# Supplementary material for: Heteroditopic receptor flexibility – an important design principle for effective ion pair extractants based on carboxylate studies
Source: Royal Society of Chemistry journal article supplement (doi:10.1039/d1nj03353k), 2021-01-01
Supplement: d1nj03353k1.pdf [file d1nj03353k1.pdf]

## Supporting Information

### Heteroditopic receptor flexibility – an important design principle for effective ion pair extractants based on carboxylates studies

Maciej Zakrzewski<sup>a</sup> and Piotr Piątek<sup>a\*</sup>

<sup>a</sup> Faculty of Chemistry, University of Warsaw, Pasteura 1, 02-093 Warsaw, Poland

#### Table of Contents:

1. Synthetic route to the receptors **1-5** with general experimental procedures and NMR spectra
2. The <sup>1</sup>H NMR titration experiments
3. The <sup>1</sup>H NMR extraction experiments
4. The 2D NMR ROESY experiment
5. The calculated structures of **2**•KOAc and **4**•KOAc complexes
6. References

#### General Information

All solvents and starting materials were purchased from Merc or Fluorochem. All commercial-grade chemicals were used without further purification. The TBAOAc salt and cation ClO<sub>4</sub><sup>-</sup> or PF<sub>6</sub><sup>-</sup> salts were dried under high vacuum at 30–45 °C before using. <sup>1</sup>H and <sup>13</sup>C NMR spectra as well as titration experiments were performed on a 300 MHz Bruker Avance spectrometer. <sup>1</sup>H NMR chemical shifts δ are reported in ppm with reference to the tetramethylsilane or protonated residual solvent signal (CDCl<sub>3</sub>/CD<sub>3</sub>CN). N-(3-Nitrobenzyl)-aza-18-crown-6 was prepared according to our literature report <sup>1</sup>.

#### 1. Synthetic route to the receptors **1-5** with general experimental procedures and NMR spectra

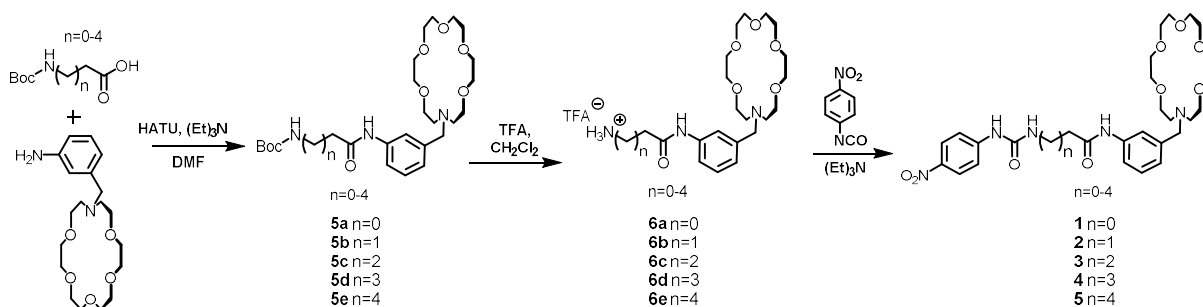

### General procedure for compounds 5(a-e)

The solution of 1.65 mmol (1.1 eq) N-Boc-amino acid, 1.65 mmol (1.1 eq) HATU and 0.73 g (1.0 mL, 7.2 mmol) triethylamine, dissolved in 17 mL of dry DMF, was stirred under argon atmosphere at room temperature for 1 h. Then 1.5 mmol of N-(3-nitrobenzyl)-aza-18-crown-6 was added. The reaction mixture was then stirred at room temperature overnight. Then the solvent was evaporated. The oily residue was dissolved in chloroform and washed two times with distilled water. The organic phase was dried over MgSO<sub>4</sub>, filtered and the solvent was evaporated. The oil was purified by column chromatography on silica gel with chloroform then with 4% methanol/chloroform as eluents to give desired product.

**(3-aminobenzyl)-aza-18-crown-6 amide of (tert-butyloxycarbonyl)glycine (5a):** 0.66 g (1.26 mmol) of an amorphous solid, 84% of yield; R<sub>f</sub> (10% MeOH/DCM) = 0.63; <sup>1</sup>H NMR (300 MHz, CD<sub>3</sub>CN, δ<sub>ppm</sub>): 8.64 (s, 1H), 7.74 (s, 1H), 7.62 (m, 1H), 7.40 (m, 1H), 7.20 (d, 1H, J=6 Hz), 5.74 (s, 1H), 4.27 (s, 2H), 3.81 (d, 1H, J=6 Hz), 3.76 (t, 4H, J=6 Hz), 3.60 (m, 18H), 3.22 (bs, 4H), 1.43 (s, 9H); <sup>13</sup>C NMR (75 MHz, CD<sub>3</sub>CN): δ 169.70, 157.20, 140.04, 130.64, 127.53, 123.07, 121.64, 80.17, 70.91, 70.74, 70.60, 65.09, 57.18, 54.26, 45.23, 28.58, 28.04

**(3-aminobenzyl)-aza-18-crown-6 amide of 2-(tert-butyloxycarbonyl)amino)propanoic acid (5b):** 0.41 g (0.78 mmol) of an amorphous solid, 52% of yield; R<sub>f</sub> (10% MeOH/DCM) = 0.5; <sup>1</sup>H NMR (300 MHz, CD<sub>3</sub>CN, δ<sub>ppm</sub>): 8.61 (s, 1H), 7.73 (s, 1H), 7.62 (bs, 1H), 7.39 (m, 1H), 7.17 (d, 1H, J=9 Hz), 5.50 (bs, 1H), 4.25 (bs, 2H), 3.75 (t, 4H, J=6 Hz), 3.59 (m, 16H), 3.35 (dd, 2H, J<sub>1</sub>=6 Hz, J<sub>2</sub>=12 Hz), 3.21 (m, 4H), 2.51 (t, 2H, J=6 Hz), 1.39 (s, 9H); <sup>13</sup>C NMR (75 MHz, CD<sub>3</sub>CN): δ 171.24, 156.87, 140.43, 130.55, 127.29, 122.85, 121.40, 79.42, 79.16, 70.87, 70.66, 70.58, 70.53, 65.19, 57.22, 54.50, 37.87, 37.43, 28.62.

**(3-aminobenzyl)-aza-18-crown-6 amide of 3-(tert-butyloxycarbonyl)amino)butanoic acid (5c):** 0.74 g (1.37 mmol) of an amorphous solid, 92% of yield; R<sub>f</sub> (10% MeOH/DCM) = 0.6; <sup>1</sup>H NMR (300 MHz, CD<sub>3</sub>CN, δ<sub>ppm</sub>): 8.65 (s, 1H), 7.73 (s, 1H), 7.61 (bs, 1H), 7.39 (m, 1H), 7.17 (d, 1H, J=9 Hz), 5.41 (bs, 1H), 4.30 (bs, 2H), 3.61 (m, 18H), 3.25 (m, 4H), 3.9 (dd, 2H, J<sub>1</sub>=6 Hz, J<sub>2</sub>=12 Hz), 2.34 (t, 2H, J=6 Hz), 1.78 (q, 2H, J=6 Hz), 1.40 (s, 9H); <sup>13</sup>C NMR (75 MHz, CD<sub>3</sub>CN): δ 171.52, 156.24, 139.66, 129.56, 126.43, 122.12, 78.18, 70.04, 69.64, 63.78, 55.67, 53.66, 39.52, 33.89, 27.67, 25.70

**(3-aminobenzyl)-aza-18-crown-6 amide of 4-(tert-butyloxycarbonyl)amino)pentanoic acid (5d):** 0.74 g (1.37 mmol) of an amorphous solid, 69% of yield; R<sub>f</sub> (10% MeOH/DCM) = 0.52; <sup>1</sup>H NMR (300 MHz, CD<sub>3</sub>CN, δ<sub>ppm</sub>): 8.53 (s, 1H), 7.72 (s, 1H), 7.63 (d, 1H, J=9 Hz), 7.38 (m, 1H), 7.17 (d, 1H, J=6 Hz), 5.35 (bs, 1H), 4.27 (bs, 2H), 3.76 (m, 4H), 3.61 (m, 16H), 3.23 (m, 4H), 3.04 (m, 2H), 2.34 (m, 2H), 1.64 (m, 2H), 1.48 (m, 2H), 1.39 (s, 9H); <sup>13</sup>C NMR (75 MHz, CD<sub>3</sub>CN): 172.64, 156.87, 140.55, 130.45, 127.05, 122.69, 121.36, 79.05, 78.92, 70.80, 70.59, 70.47, 64.87, 57.10, 54.24, 40.60, 37.08, 30.22, 28.58, 23.20

**(3-aminobenzyl)-aza-18-crown-6 amide of 5-(tert-butyloxycarbonyl)amino)hexanoic acid(5e):** 0.4 g (0.7 mmol) of an amorphous solid, 63% of yield; R<sub>f</sub> (10% MeOH/DCM) = 0.55; <sup>1</sup>H NMR (300 MHz, CDCl<sub>3</sub>, δ<sub>ppm</sub>): 8.27 (bs, 1H), 7.97 (bs, 1H), 7.50 (bs, 2H), 7.06 (m, 2H), 4.70 (bs, 1H), 4.22 (bs, 1H), 3.60 (m, 18H), 3.52 (m, 2H), 3.05 (m, 2H), 2.36 (bs, 2H), 2.33 (m, 2H), 1.67 (m, 2H), 1.44 (m, 2H), 1.38 (bs, 9H); <sup>13</sup>C NMR (75 MHz, CD<sub>3</sub>CN): 172.75, 156.98, 140.66, 130.56, 127.16, 122.80, 121.47, 79.16, 79.02, 70.90, 70.69, 70.58, 64.97, 57.21, 54.35, 40.71, 37.19, 30.33, 28.68, 23.31.

### General procedure for compounds 6(a-e)

The solution of (3-aminobenzyl)-aza-18-crown-6 amide of N-Boc-aminoacides (1.62 mmol) in 4 mL of DCM was cooled to 0 °C using dry ice/water bath. To this solution 3.0 mL of trifluoroacetic acid was added. Then cooling bath was removed and the reaction mixture was stirred at room temperature for 1 h. The full conversion of the substrate was confirmed by TLC analysis in 10% MeOH/DCM. Then the volatiles were evaporated and the residue was dried

under high vacuum to give desired compound in form of TFA salts. These compounds were used in the next step without further purification.

#### General procedure for Receptors 1-5:

In round bottom flask the 1.26 mmol of trifluoroacetic acid salt of (3-aminobenzyl)-aza-18-crown-6 amide of amino acids (6a-e) and 2.0 mL (1.45 g, 1.4 mmol, 2 eq.) of triethylamine were dissolved in 5 mL of dry THF. To the resulting mixture 4-nitrophenyl isothiocyanate (1.39 mmol, 1.1 eq.) was added, under argon atmosphere. The reaction mixture was stirred overnight at room temperature. Then the solvent was evaporated and the resulting oil was dissolved in chloroform and washed two times with distilled water. The organic phase was dried over  $\text{MgSO}_4$ , filtered and the solvent was evaporated. Receptor was absorbed on silica gel and filtered using ethyl acetate to remove isocyanate impurities, and then 20% MeOH/DCM. Then after evaporation the receptor was dissolved in chloroform and some portion of solid  $\text{MgSO}_4$  was added and left overnight. After filtration and solvent evaporation the receptor•salt complex was purified by column chromatography on silica gel with 10% MeOH/DCM as eluents to give an amorphous solid. For decomplexation of receptor•salt complex, the complexes of receptors 1-5 were dissolved in chloroform and washed 3 times with distilled water. Then solvents were evaporated (without drying) to give “free” desired receptor.

**Receptor 1:** 0.33 g (0.57 mmol) of an amorphous yellow solid, 45% of yield;  $R_f$  (10% MeOH/DCM) = 0.22;  $^1\text{H}$  NMR (300 MHz,  $\text{CD}_3\text{CN}$ ,  $\delta_{\text{ppm}}$ ): 8.71 (s, 1H), 8.35 (s, 1H), 8.07 (d, 2H,  $J=9$  Hz), 7.57 (m, 4H), 7.23 (t, 1H,  $J=9$  Hz), 7.02 (d, 1H,  $J=6$  Hz), 6.13 (m, 1H), 3.93 (d, 2H,  $J=6$  Hz), 3.58 (m, 22H), 2.67 (m, 4H);  $^{13}\text{C}$  NMR (75 MHz,  $\text{CD}_3\text{CN}$ ): 169.43, 155.73, 147.42, 142.59, 139.29, 129.44, 125.83, 125.18, 121.06, 118.18, 71.34, 71.11, 70.87, 70.41, 60.01, 55.18, 44.67; HR-MS (ESI):  $m/z$  = 612.2620  $[\text{M}+\text{Na}]^+$  (calc. for  $\text{C}_{28}\text{H}_{39}\text{N}_5\text{O}_9\text{Na}$ : 612.2643)

**Receptor 2:** 0.28 g (0.46 mmol) of an amorphous light-yellow solid, 60% of yield;  $R_f$  (10% MeOH/DCM) = 0.3;  $^1\text{H}$  NMR (300 MHz,  $\text{CD}_3\text{CN}$ ,  $\delta_{\text{ppm}}$ ): 8.70 (s, 1H), 8.23 (s, 1H), 8.03 (d, 2H,  $J=9$  Hz), 7.54 (m, 4H), 7.19 (t, 1H,  $J=6$  Hz), 6.97 (d, 1H,  $J=9$  Hz), 6.11 (t, 1H,  $J=6$  Hz), 3.51 (m, 26H), 2.63 (t, 4H,  $J=6$  Hz), 2.57 (t, 2H,  $J=6$  Hz);  $^{13}\text{C}$  NMR (75 MHz,  $\text{CD}_3\text{CN}$ ): 171.43, 155.61, 147.64, 142.21, 141.60, 139.52, 129.33, 125.78, 125.05, 120.98, 119.13, 118.26, 118.03, 71.24, 71.03, 70.80, 70.23, 60.03, 54.96, 37.72, 36.84, 2.09, 1.82, 1.54, 1.26, 0.99, 0.71, 0.44; HR-MS (ESI):  $m/z$  = 626.2819  $[\text{M}+\text{Na}]^+$  (calc. for  $\text{C}_{29}\text{H}_{41}\text{N}_5\text{O}_9\text{Na}$ : 626.2802)

**Receptor 3:** 0.45 g (0.74 mmol) of an amorphous yellow solid, 55% of yield;  $R_f$  (10% MeOH/DCM) = 0.28;  $^1\text{H}$  NMR (300 MHz,  $\text{CD}_3\text{CN}$ ,  $\delta_{\text{ppm}}$ ): 9.51 (s, 1H), 9.24 (s, 1H), 8.04 (d, 2H,  $J=9$  Hz), 7.71 (s, 1H), 7.63 (m, 3H), 7.30 (m, 1H), 7.10 (m, 2H), 4.11 (bs, 2H), 3.69 (t, 4H,  $J=6$  Hz), 3.55 (m, 15H), 3.25 (m, 2H), 3.09 (m, 4H), 2.39 (m, 2H), 1.85 (m, 2H);  $^{13}\text{C}$  NMR (75 MHz,  $\text{CD}_3\text{CN}$ ): 172.58, 162.32, 161.88, 156.27, 148.51, 141.88, 140.57, 130.12, 126.34, 125.83, 122.27, 120.84, 120.12, 117.82, 116.21, 79.12, 71.00, 70.90, 70.80, 66.42, 58.19, 54.15, 39.47, 34.89, 26.94; HR-MS (ESI):  $m/z$  = 640.2950  $[\text{M}+\text{Na}]^+$  (calc. for  $\text{C}_{30}\text{H}_{43}\text{N}_5\text{O}_9\text{Na}$ : 640.2958)

**Receptor 4:** 0.48 g (0.76 mmol) of an amorphous dark-yellow solid, 58% of yield;  $R_f$  (10% MeOH/DCM) = 0.42;  $^1\text{H}$  NMR (300 MHz,  $\text{CD}_3\text{CN}$ ,  $\delta_{\text{ppm}}$ ): 9.10 (s, 1H), 8.79 (s, 1H), 8.03 (d, 2H,  $J=9$  Hz), 7.58 (m, 4H), 7.25 (m, 1H), 7.05 (d, 1H,  $J=9$  Hz), 6.63 (m, 1H), 3.88 (bs, 2H), 3.54 (m, 21H), 3.18 (dd, 2H,  $J_1=6$  Hz,  $J_2=12$  Hz), 2.89 (m, 4H), 2.33 (m, 2H), 1.67 (m, 2H), 1.51 (m, 2H);  $^{13}\text{C}$  NMR (75 MHz,  $\text{CD}_3\text{CN}$ ): 172.72, 156.01, 148.34, 141.95, 140.24, 129.81, 125.84, 121.89, 120.15, 117.86, 71.07, 70.88, 70.75, 67.87, 58.54, 54.72, 39.97, 37.25, 30.21, 23.55; HR-MS (ESI):  $m/z$  = 654.3091  $[\text{M}+\text{Na}]^+$  (calc. for  $\text{C}_{31}\text{H}_{45}\text{N}_5\text{O}_9\text{Na}$ : 654.3115)

**Receptor 5:** 0.28 g (0.43 mmol) of an amorphous orange solid, 63% of yield;  $R_f$  (10% MeOH/DCM) = 0.43;  $^1\text{H}$  NMR (300 MHz,  $\text{CD}_3\text{CN}$ ,  $\delta_{\text{ppm}}$ ): 8.45 (s, 1H), 8.19 (d, 2H,  $J=9$  Hz), 8.01 (s, 1H), 7.58 (m, 4H), 7.22 (m, 1H), 7.00 (d, 1H,  $J=9$  Hz), 5.69 (s, 1H), 3.66 (s, 2H), 3.58 (m, 20H), 3.19 (m, 2H), 2.71 (m, 4H), 2.31 (m, 2H), 1.68 (m, 2H), 1.53 (m, 2H), 1.38 (m, 2H);  $^{13}\text{C}$  NMR (75 MHz,  $\text{CDCl}_3$ ): 172.77, 155.82, 147.46, 140.86, 138.99, 128.85, 124.96, 124.22, 120.97,

117.09, 69.25, 68.13, 53.87, 39.40, 37.19, 29.27, 26.38, 25.27; HR-MS (ESI):  $m/z = 668.3264$   $[M+Na]^+$  (calc. for  $C_{32}H_{47}N_5O_9Na$ : 668.3271)

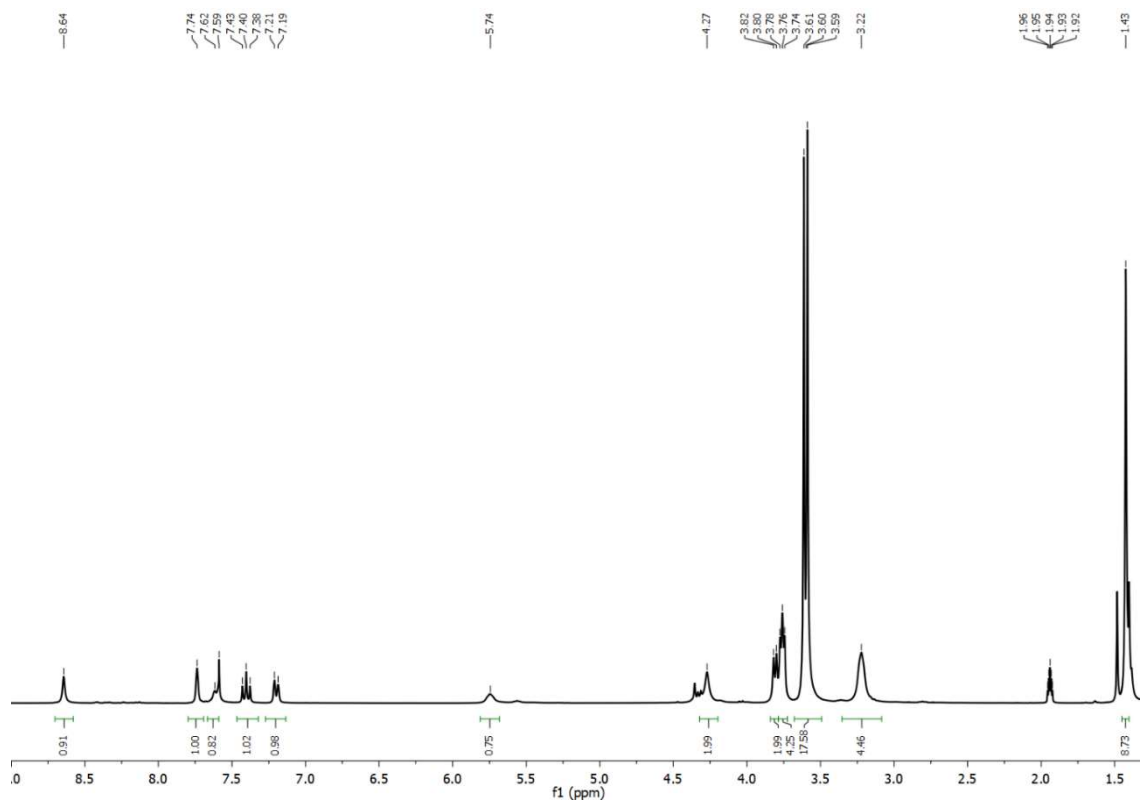

Figure S1.  $^1H$  NMR spectrum of 5a

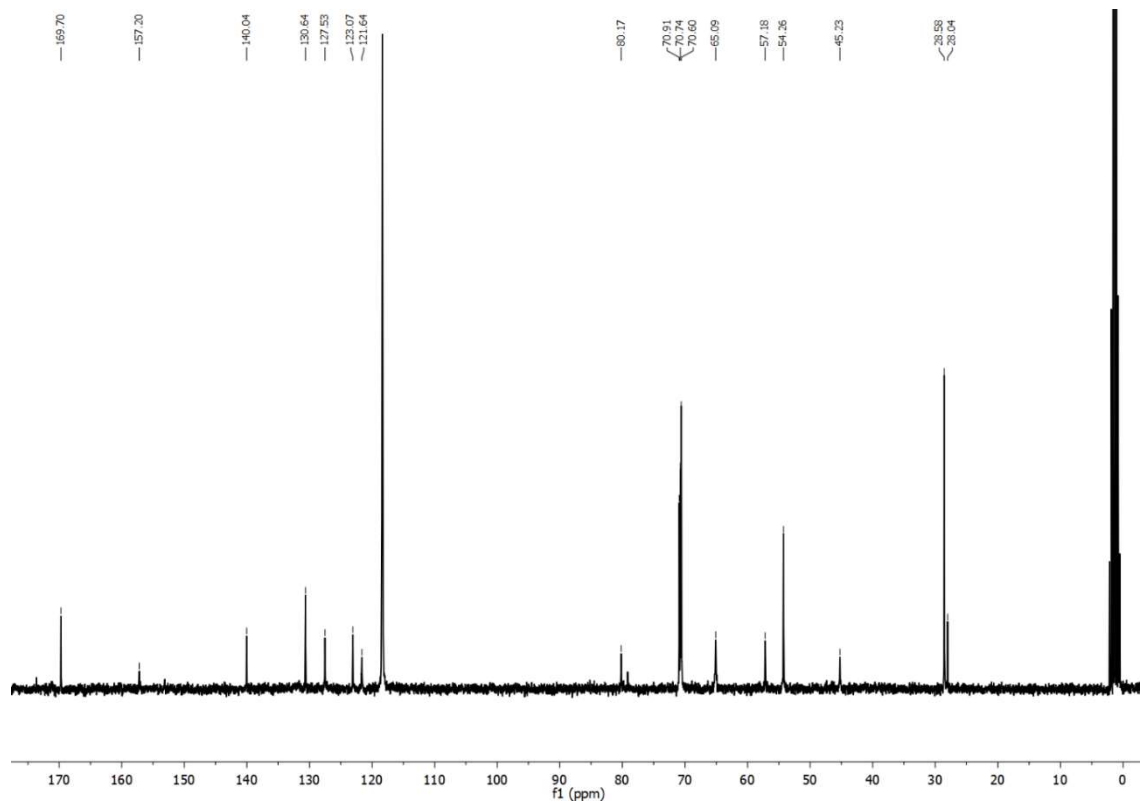

Figure S2.  $^{13}C$  NMR spectrum of 5a

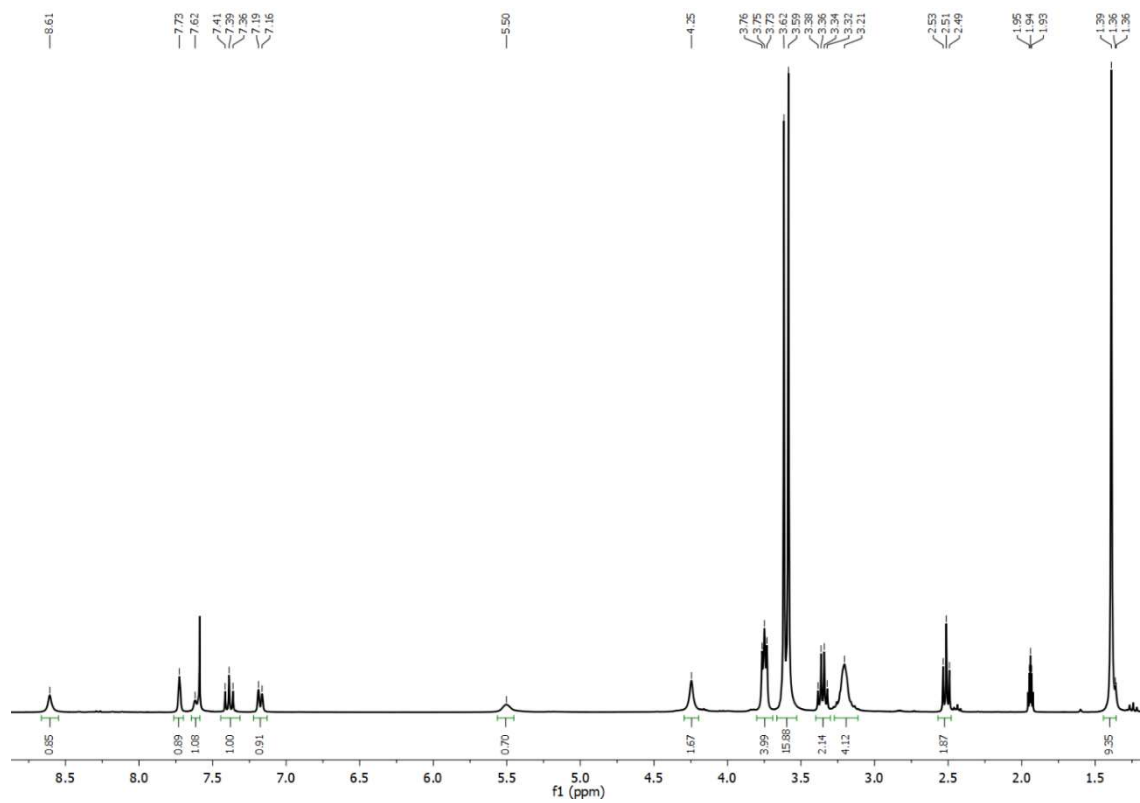

Figure S3. <sup>1</sup>H NMR spectrum of 5b

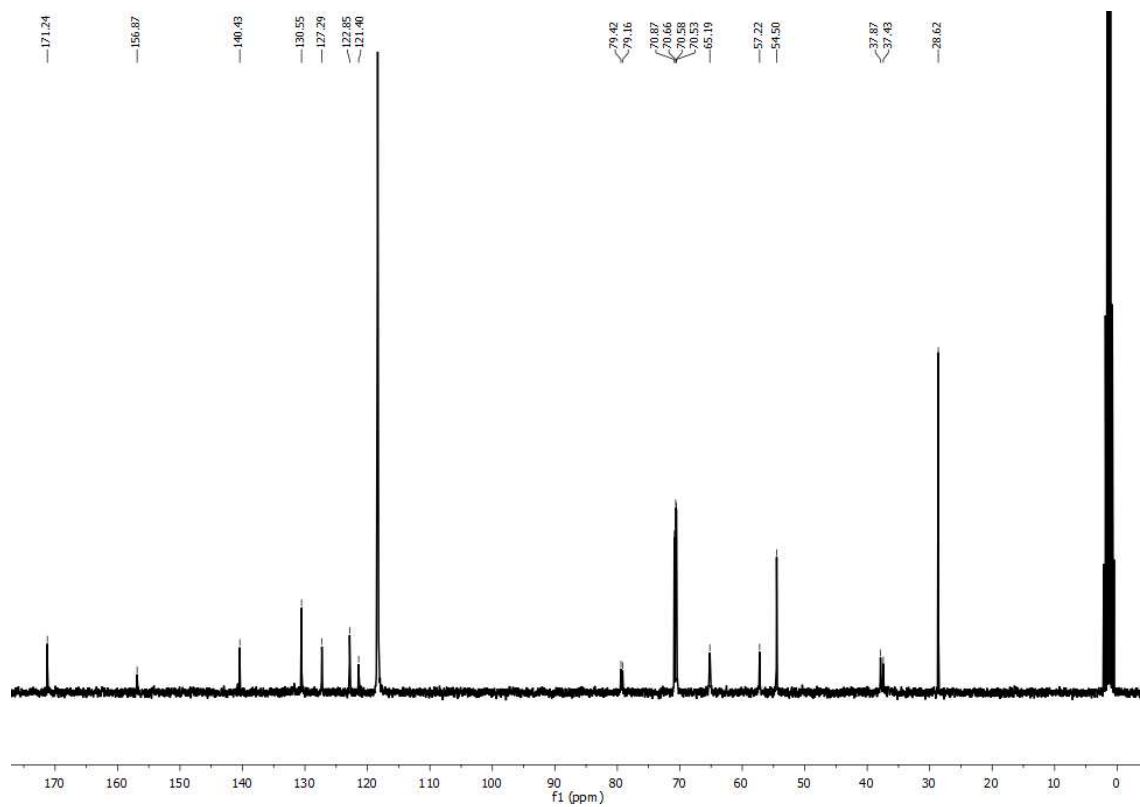

Figure S4. <sup>13</sup>C NMR spectrum of 5b

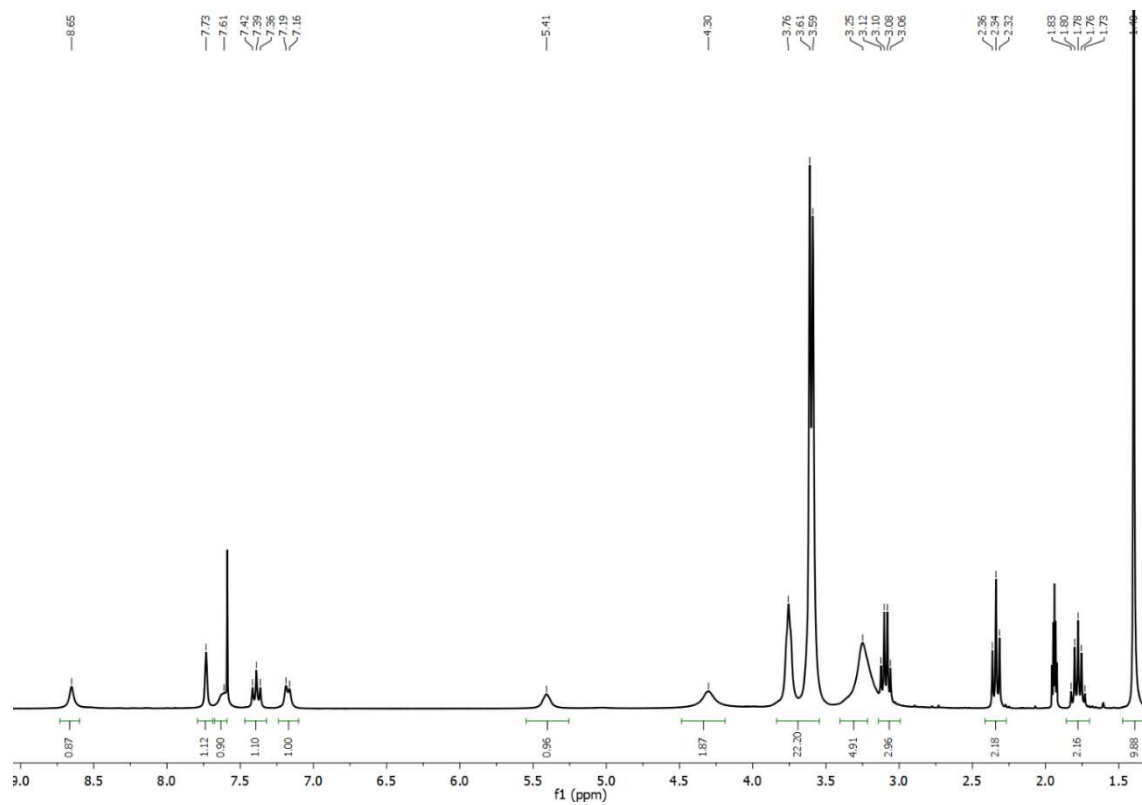

Figure S5.  $^1\text{H}$  NMR spectrum of 5c

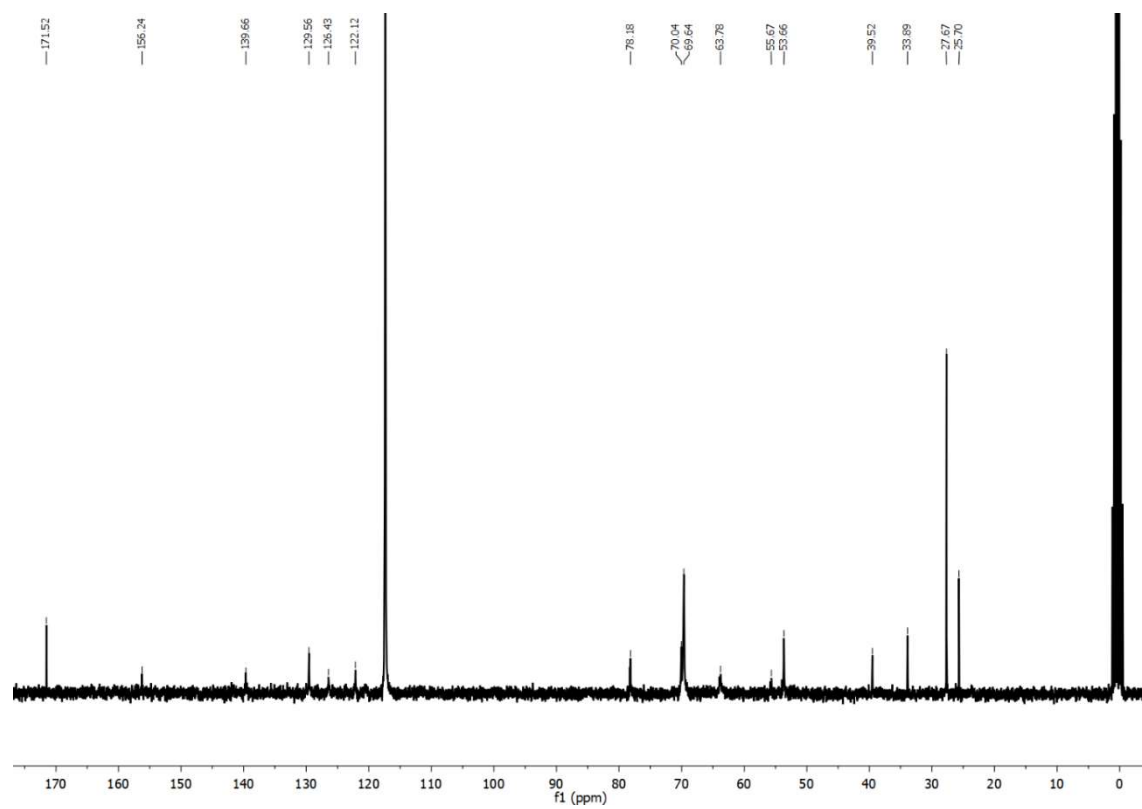

Figure S6.  $^{13}\text{C}$  NMR spectrum of 5c

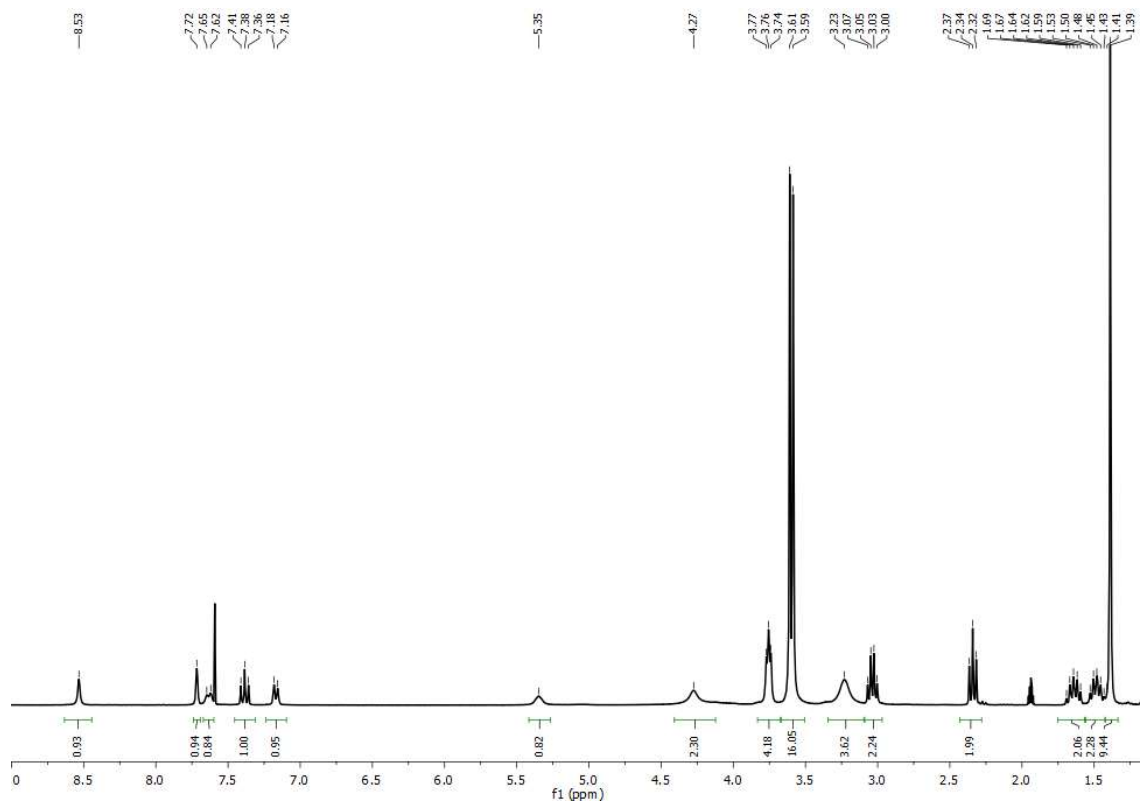

Figure S7. <sup>1</sup>H NMR spectrum of 5d

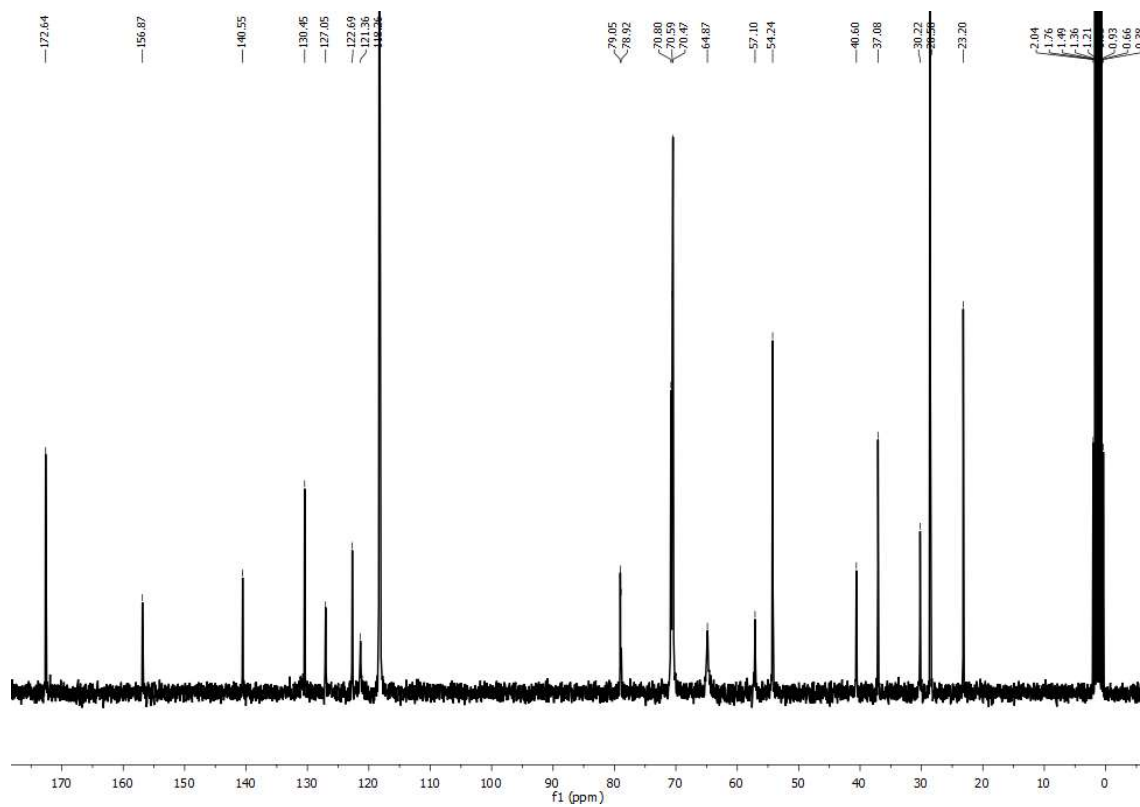

Figure S8. <sup>13</sup>C NMR spectrum of 5d

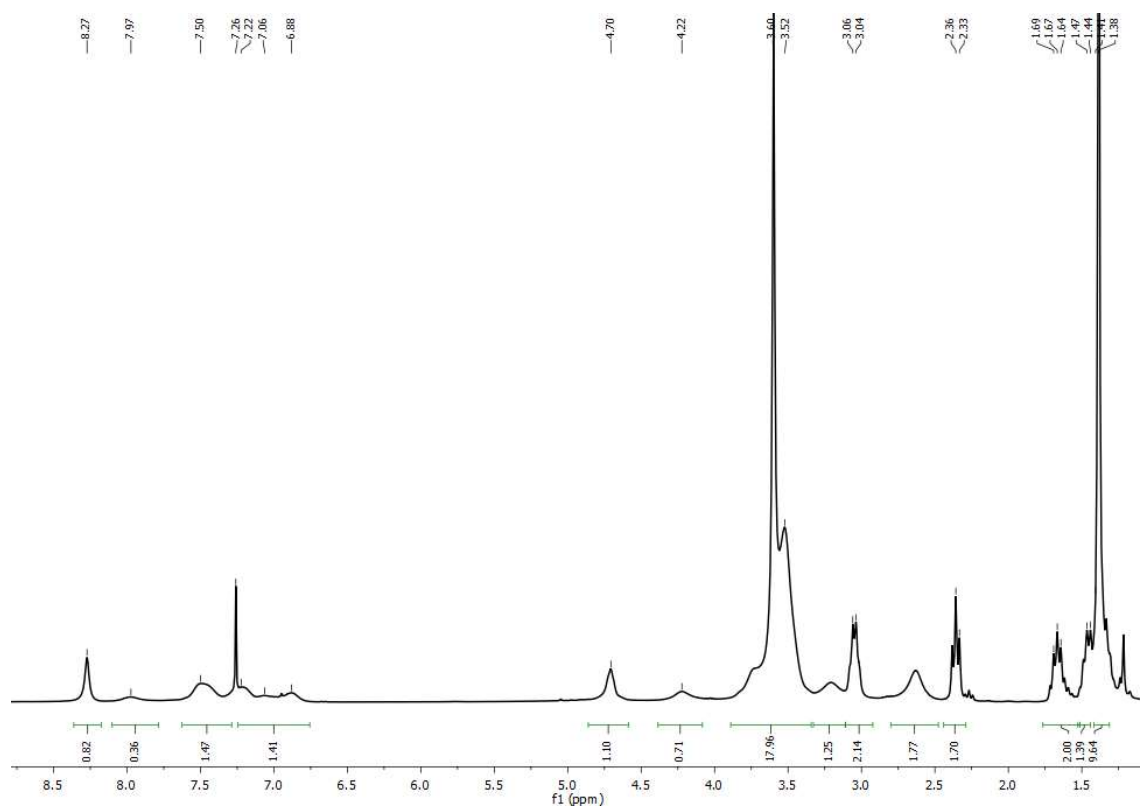

Figure S9.  $^1\text{H}$  NMR spectrum of **5e**

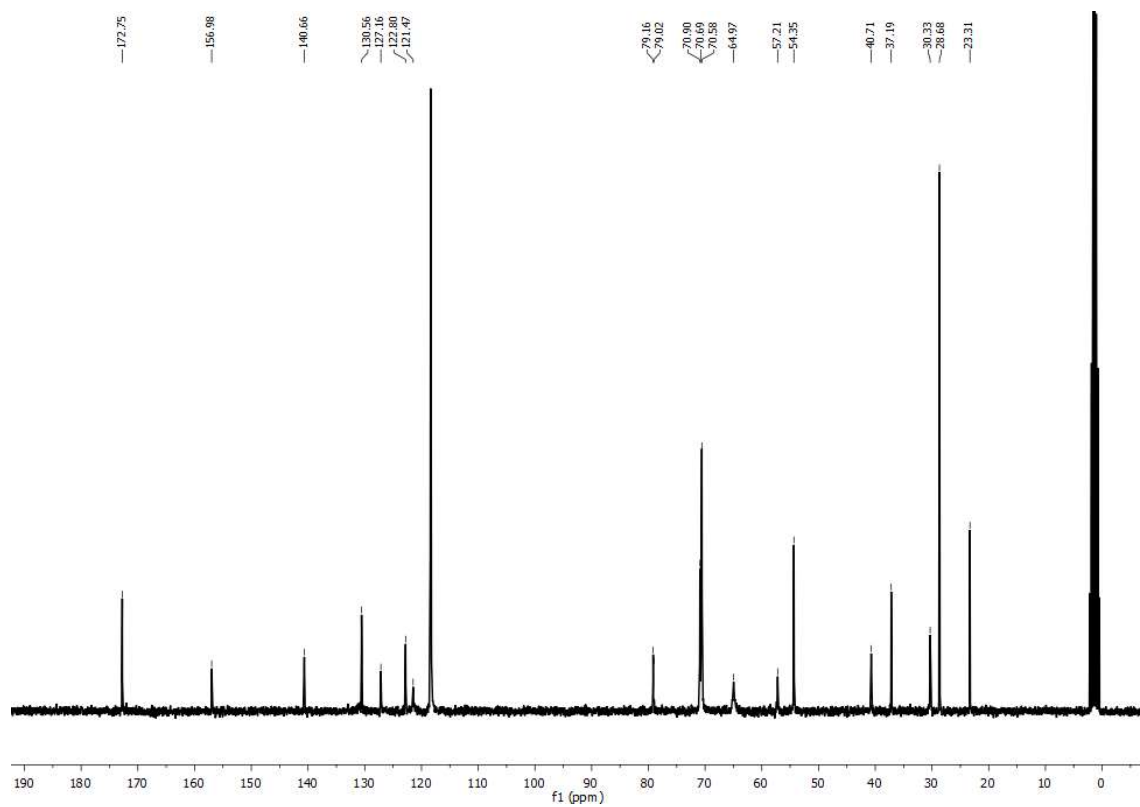

Figure S10.  $^{13}\text{C}$  NMR spectrum of **5e**



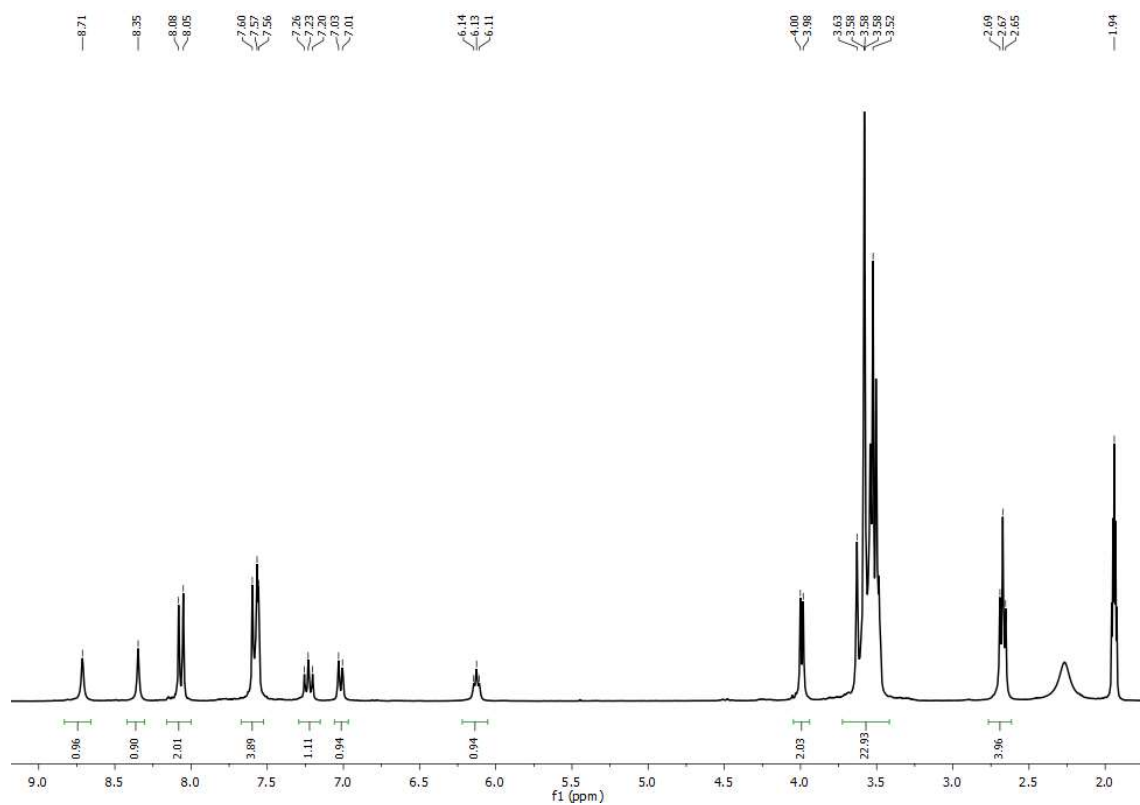

Figure S11. <sup>1</sup>H NMR spectrum of the receptor 1

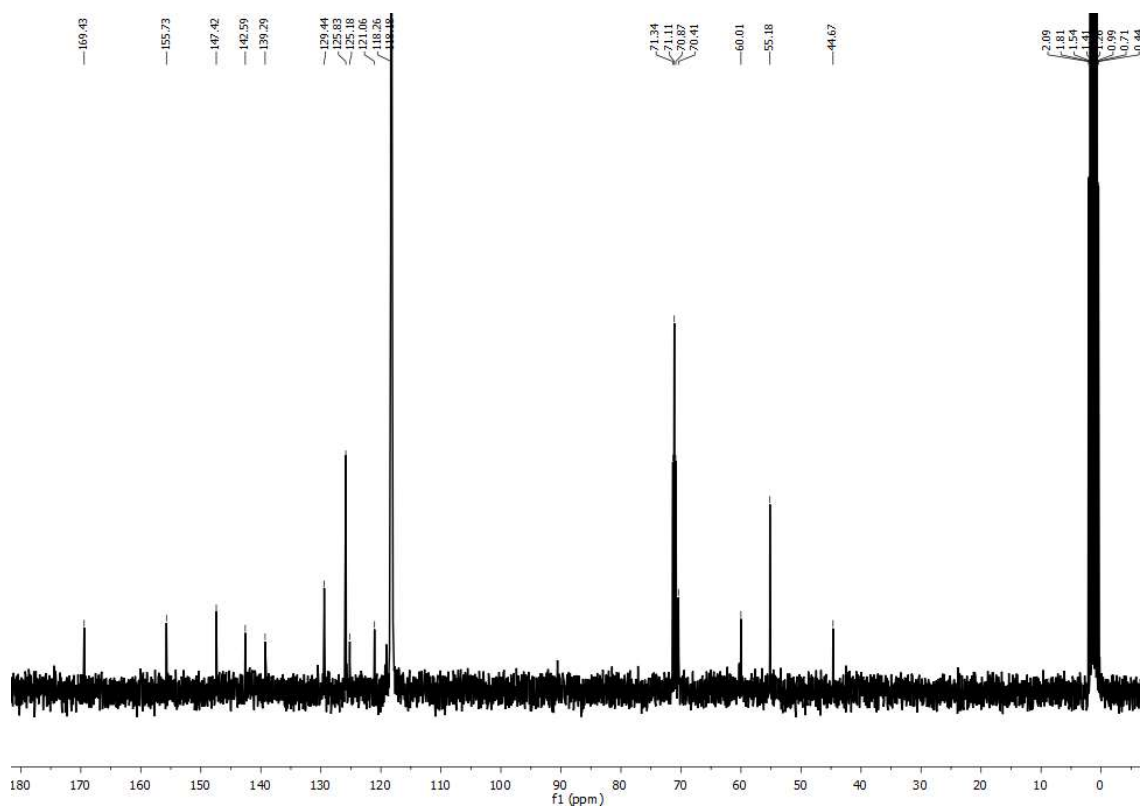

Figure S12. <sup>13</sup>C NMR spectrum of the receptor 1

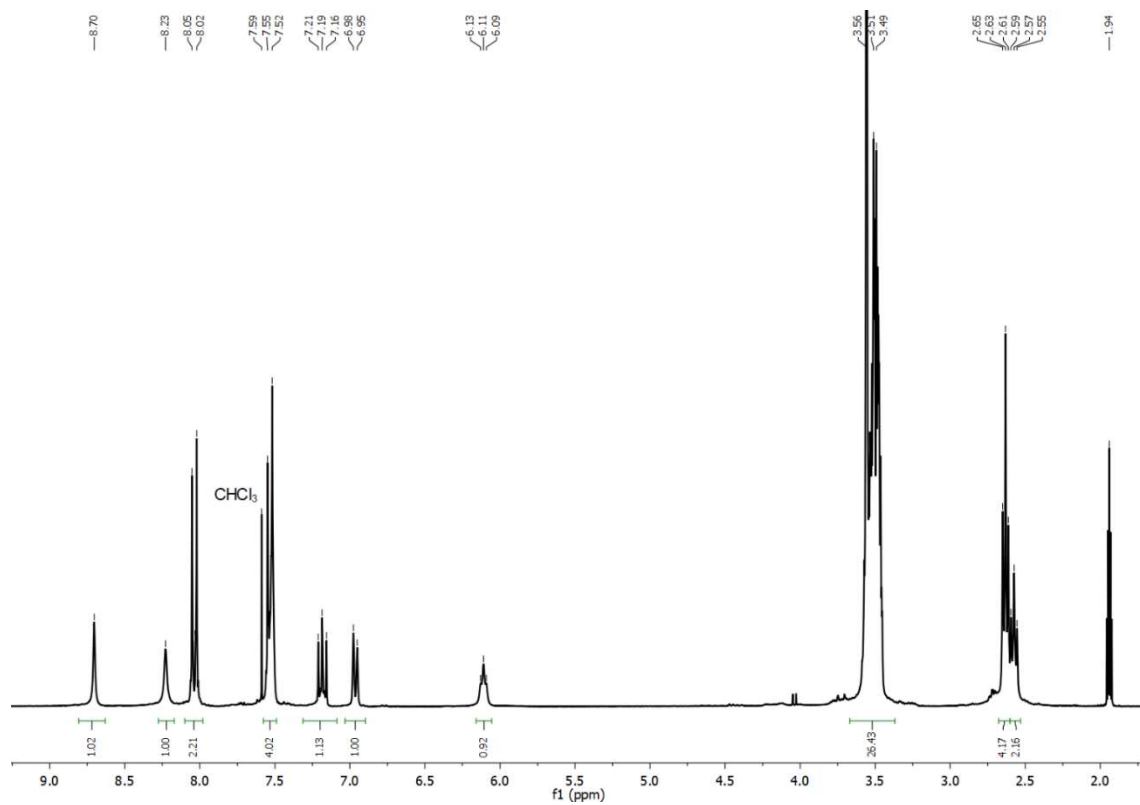

Figure S13. <sup>1</sup>H NMR spectrum of the receptor 2

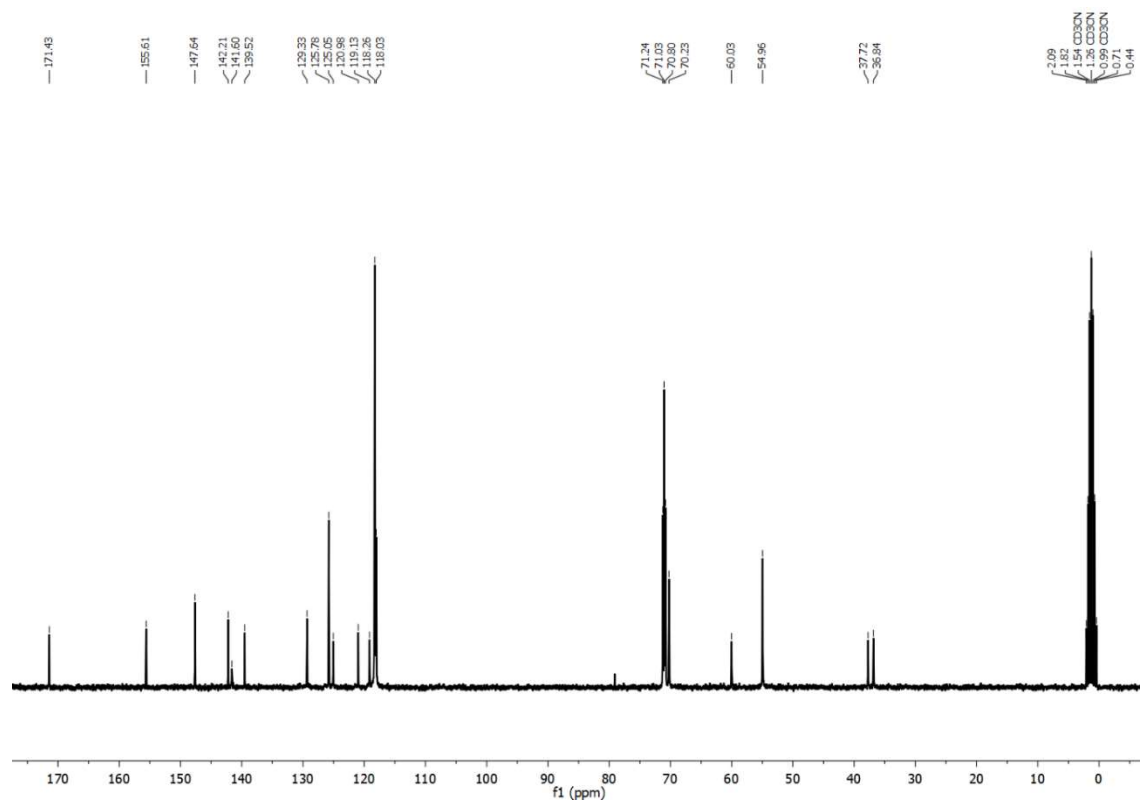

Figure S14. <sup>13</sup>C NMR spectrum of the receptor 2

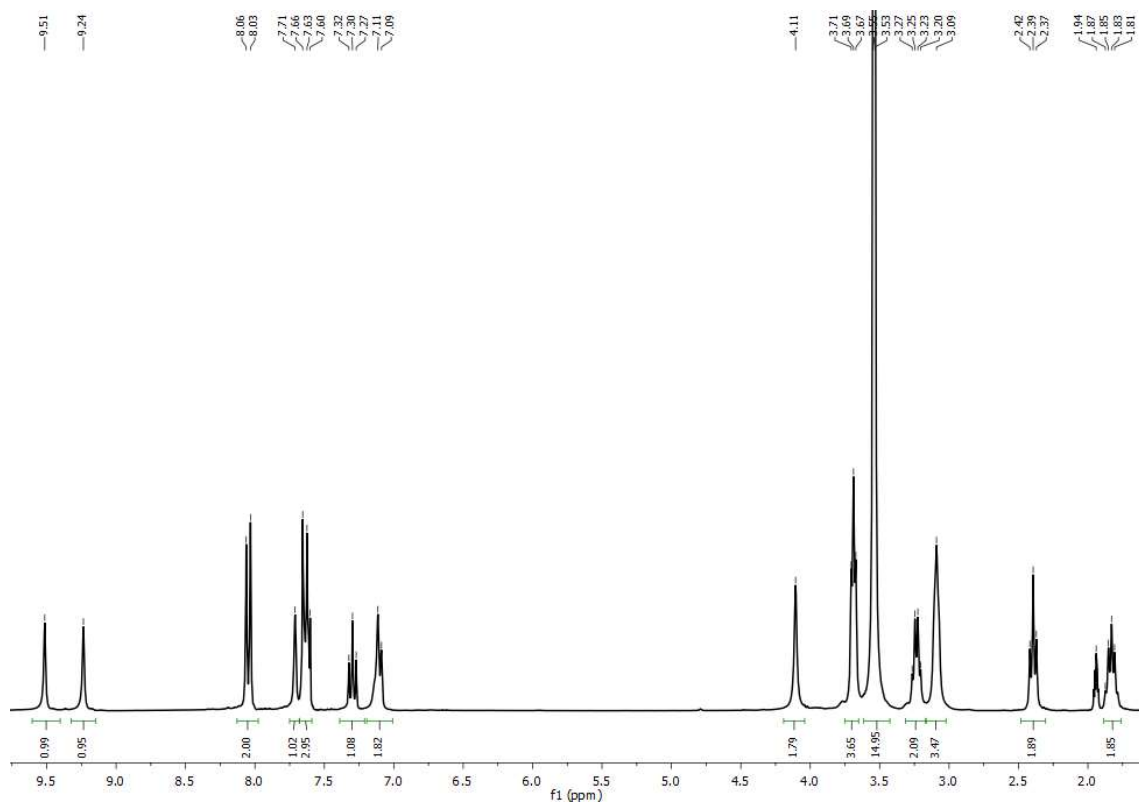

Figure S15.  $^1\text{H}$  NMR spectrum of the receptor **3**

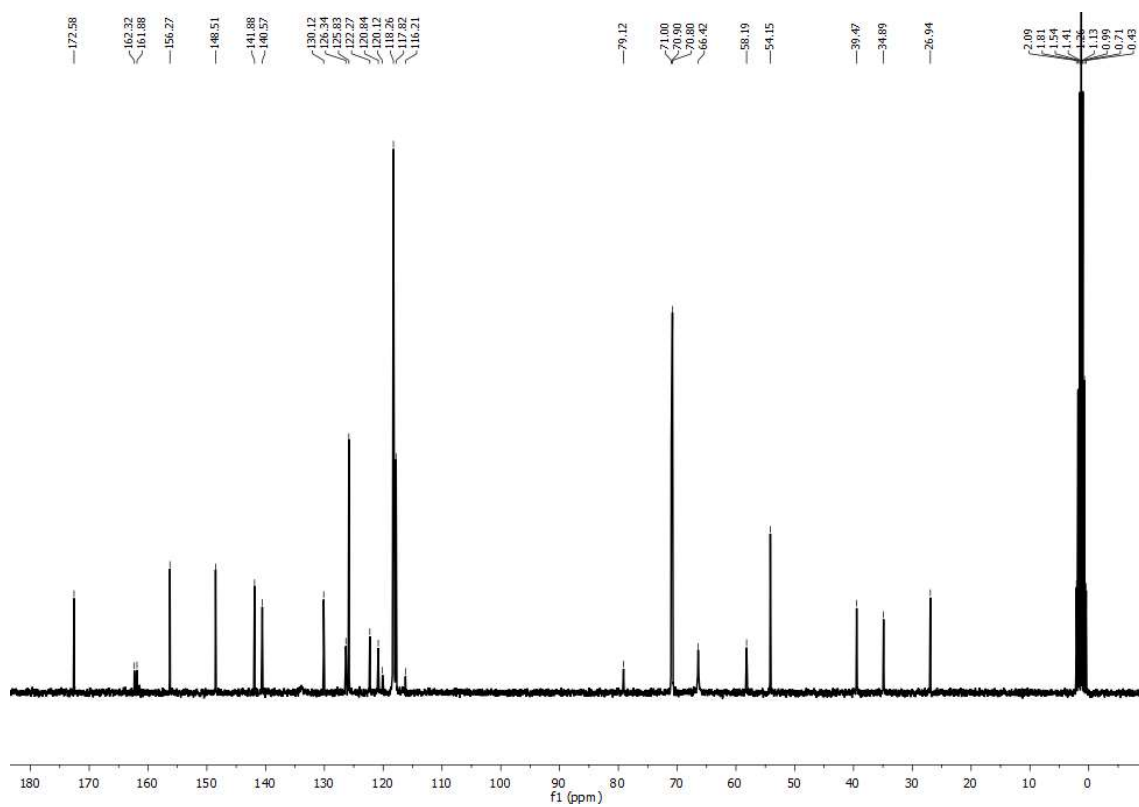

Figure S16.  $^{13}\text{C}$  NMR spectrum of the receptor **3**

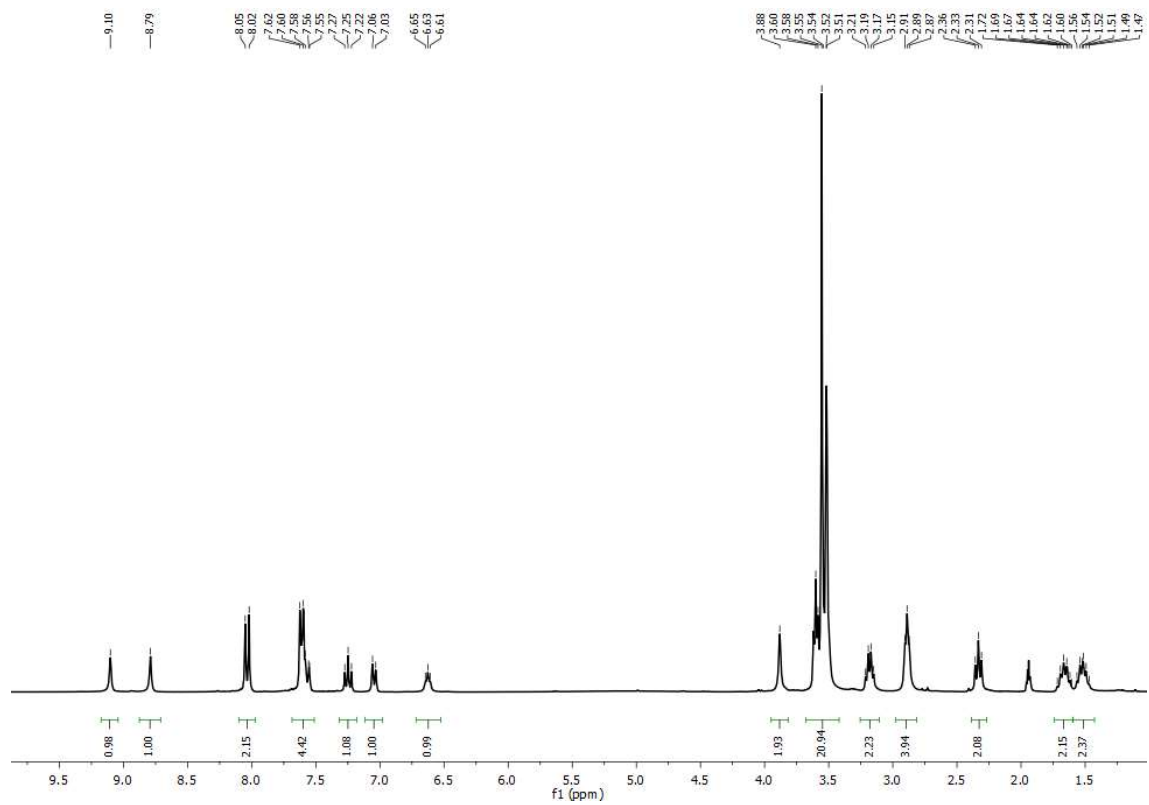

Figure S17.  $^1\text{H}$  NMR spectrum of the receptor 4

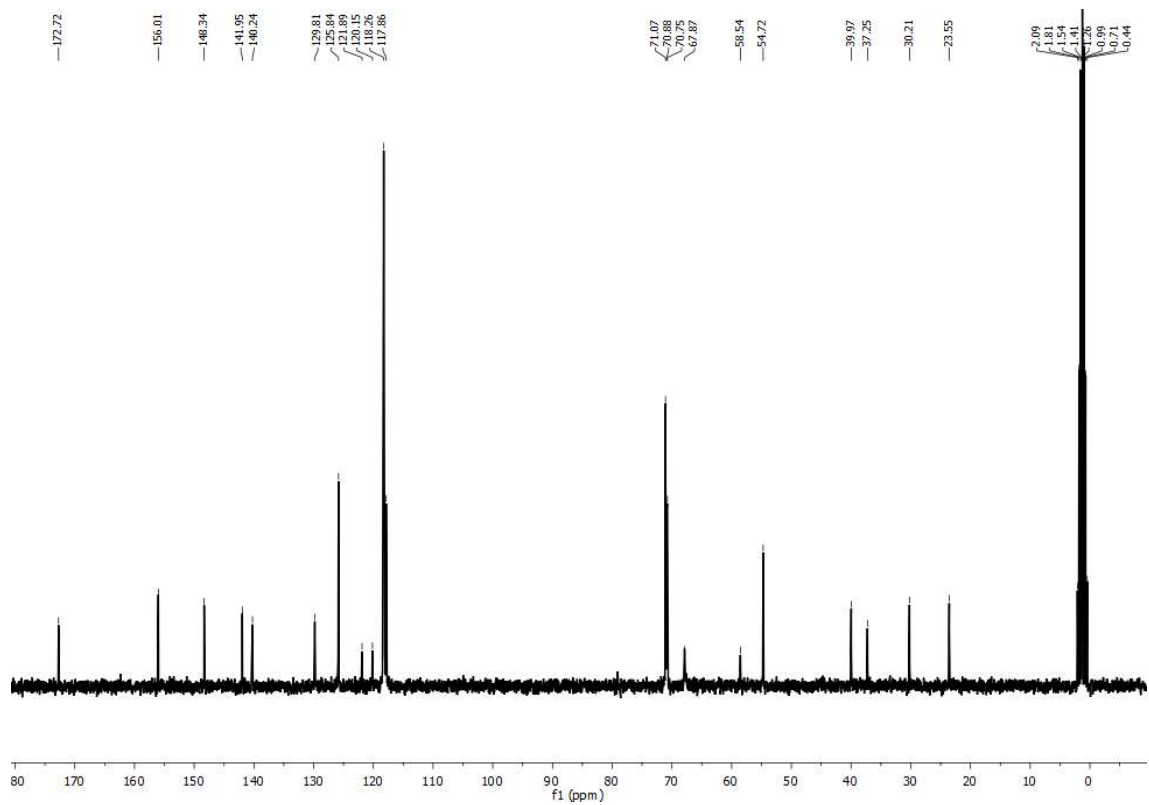

Figure S18.  $^{13}\text{C}$  NMR spectrum of the receptor 4

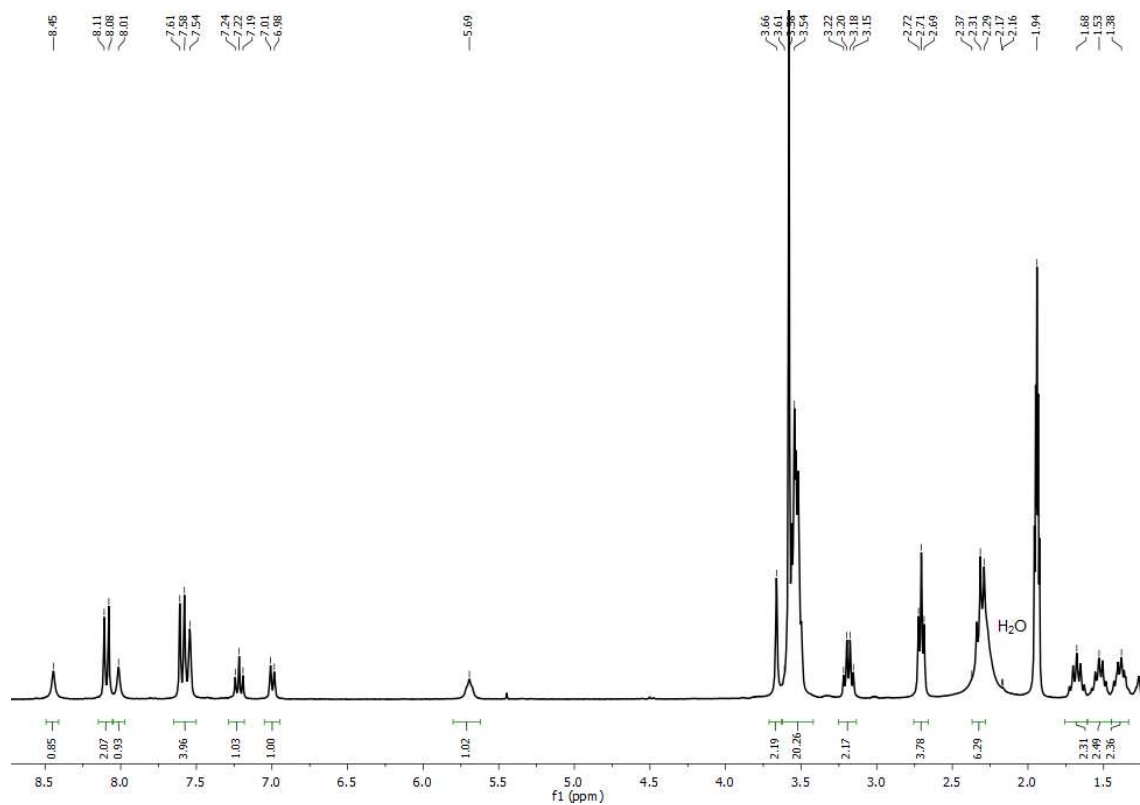

Figure S19.  $^1\text{H}$  NMR spectrum of the receptor 5

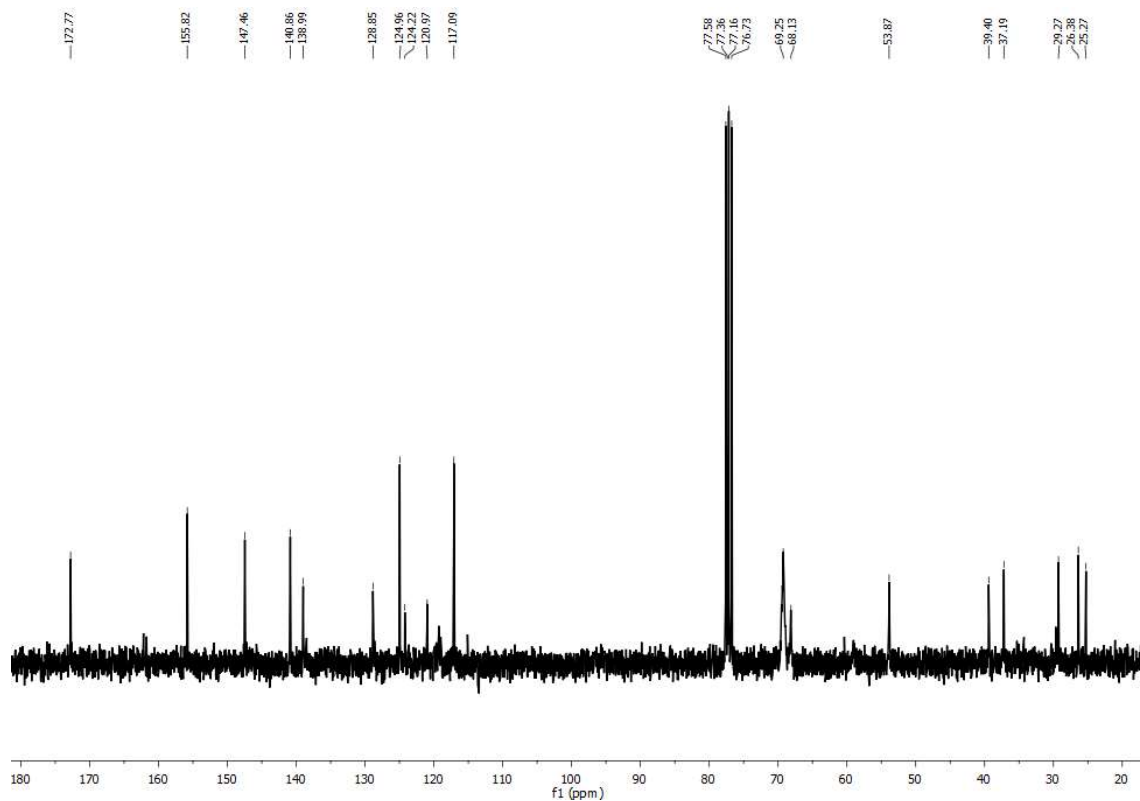

Figure S20.  $^{13}\text{C}$  NMR spectrum of the receptor 5

## 2. The $^1\text{H}$ NMR titration experiments

$^1\text{H}$  NMR titration experiments were performed on a 300 MHz Bruker Avance spectrometer, at 298 K, in 3%  $\text{H}_2\text{O}/\text{CD}_3\text{CN}$  solution. In each case 0.5 mL of  $4.0 \times 10^{-3}$  M solution of the receptor **1-5** was added to 5 mm NMR tube. The receptor solution contains or not 1 mol eq. of potassium cation. Then to the receptor solution the titrant solution of tetrabutylammonium acetate or chloride in the receptor solution ( $2.1 \times 10^{-1}$  M) was added. After each addition of the titrant, a spectrum was registered. The resulting titration data were analyzed by Bindfit.<sup>2</sup>

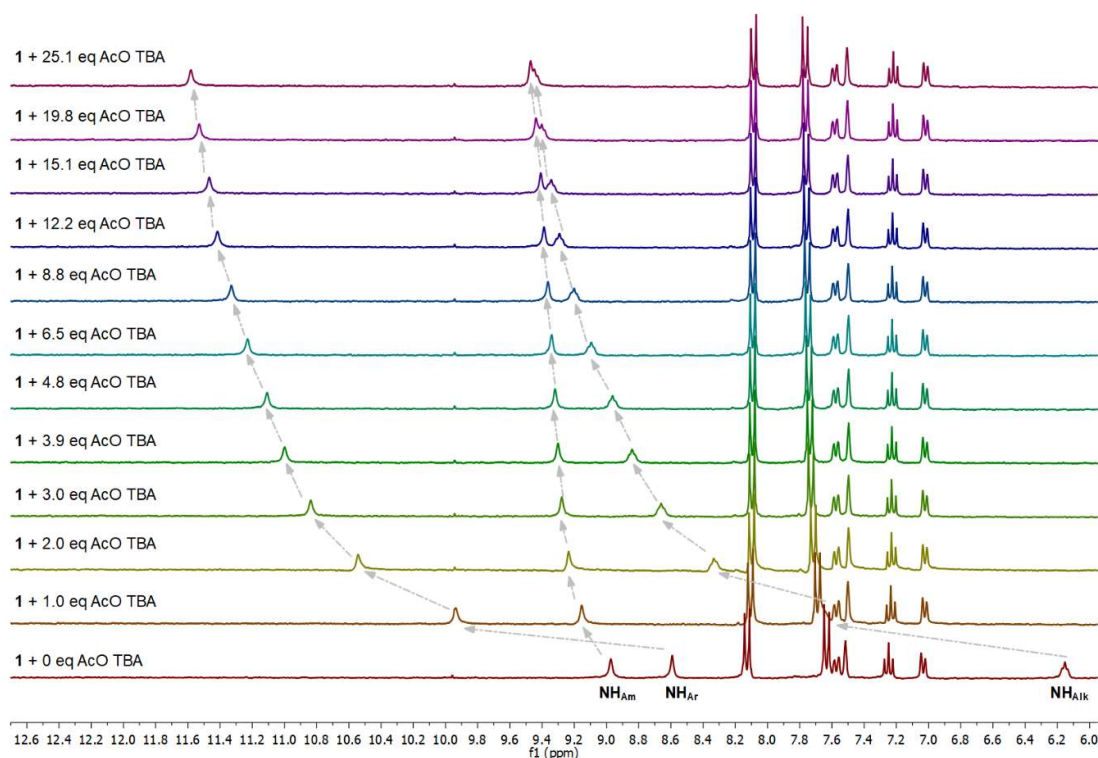

**Figure S21.** Partial  $^1\text{H}$  NMR titration experiment of **1** upon titrant (TBAOAc) addition, (293 K, 3%  $\text{H}_2\text{O}/\text{CD}_3\text{CN}$  solution,  $C_{\text{titrant}}=2.1 \times 10^{-1}$  M,  $C_{\text{receptor}}=4.0 \times 10^{-3}$  M)

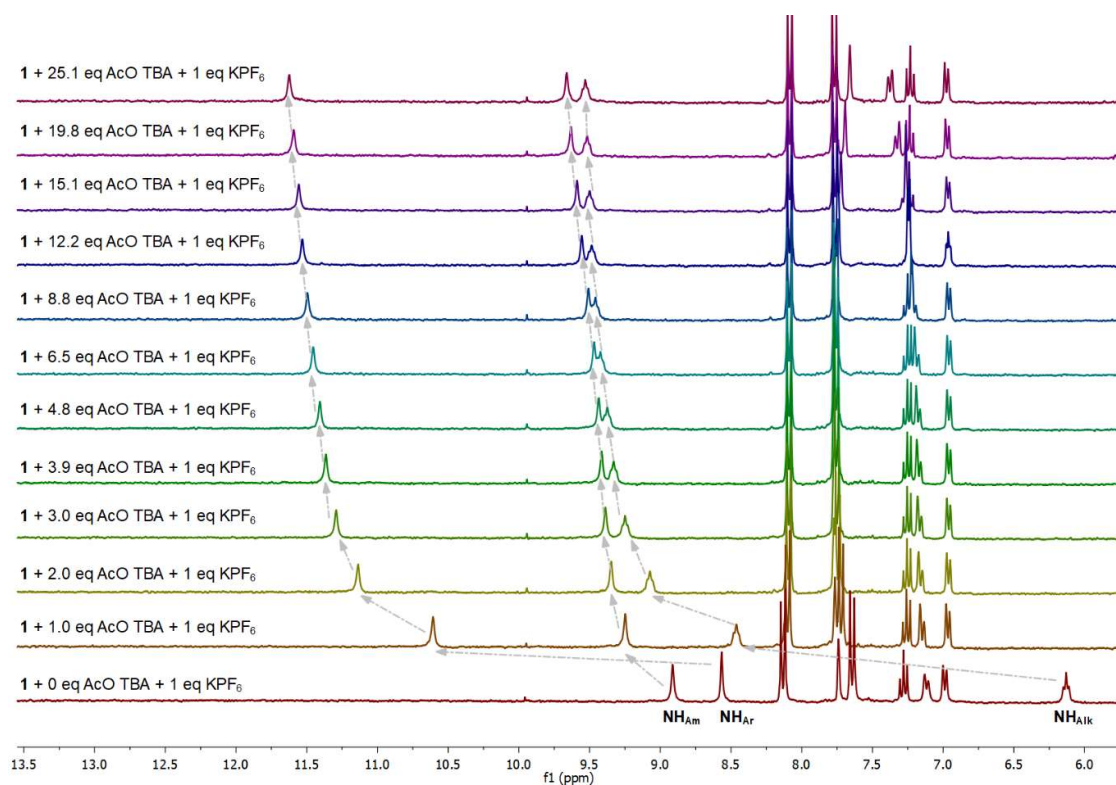

**Figure S22.** Partial  $^1\text{H}$  NMR titration experiment of **1** upon titrant (TBAOAc) addition in presence of 1eq.  $\text{KPF}_6$ , (293 K, 3%  $\text{H}_2\text{O}/\text{CD}_3\text{CN}$  solution,  $C_{\text{titrant}}=2.1 \times 10^{-1}$  M,  $C_{\text{receptor}}=4.0 \times 10^{-3}$  M)

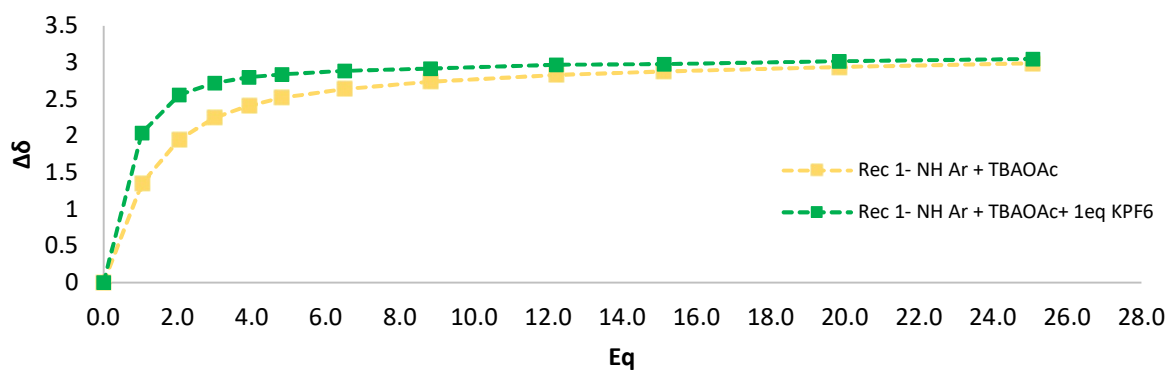

**Figure S23.**  $^1\text{H}$  NMR titration binding isotherm of **1** with TBAOAc in the presence or absence of 1 eq. of cations, 3%  $\text{H}_2\text{O}/\text{CD}_3\text{CN}$  solution

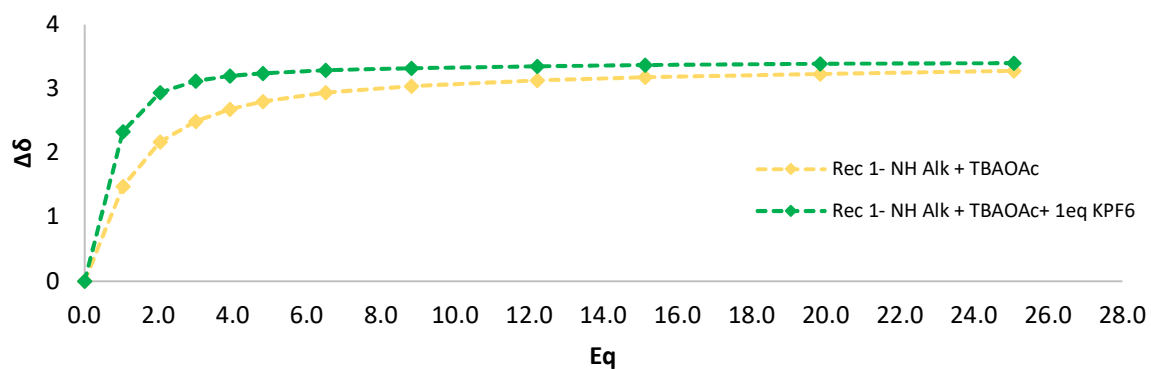

**Figure S24.**  $^1\text{H}$  NMR titration binding isotherm of **1** with TBAOAc in the presence or absence of 1 eq. of cations, 3%  $\text{H}_2\text{O}/\text{CD}_3\text{CN}$  solution

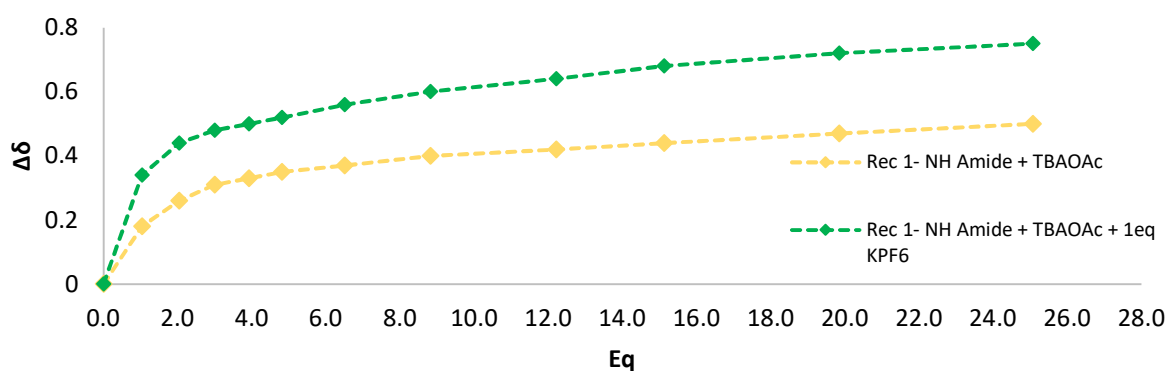

**Figure S25.**  $^1\text{H}$  NMR titration binding isotherm of **1** with TBAOAc in the presence or absence of 1 eq. of cations, 3%  $\text{H}_2\text{O}/\text{CD}_3\text{CN}$  solution

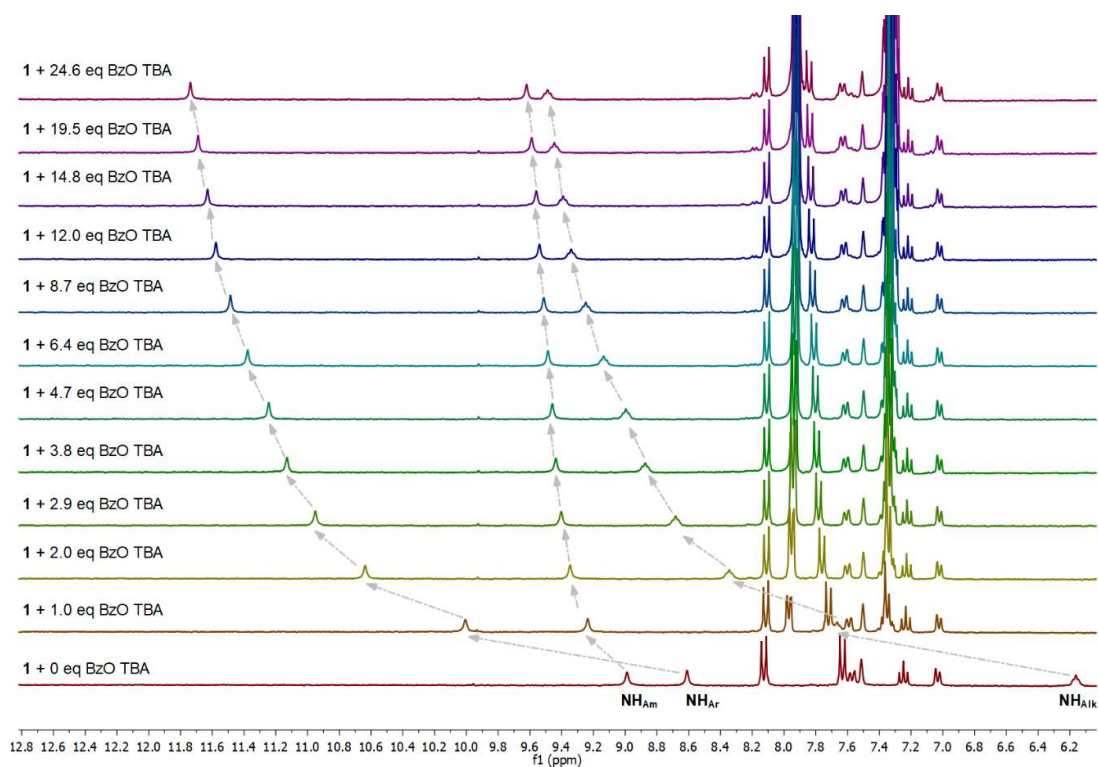

**Figure S26.** Partial  $^1\text{H}$  NMR titration experiment of **1** upon titrant (TBAOBz) addition, (293 K, 3%  $\text{H}_2\text{O}/\text{CD}_3\text{CN}$  solution,  $C_{\text{titrant}}=2.1 \times 10^{-1} \text{ M}$ ,  $C_{\text{receptor}}=4.0 \times 10^{-3} \text{ M}$ )



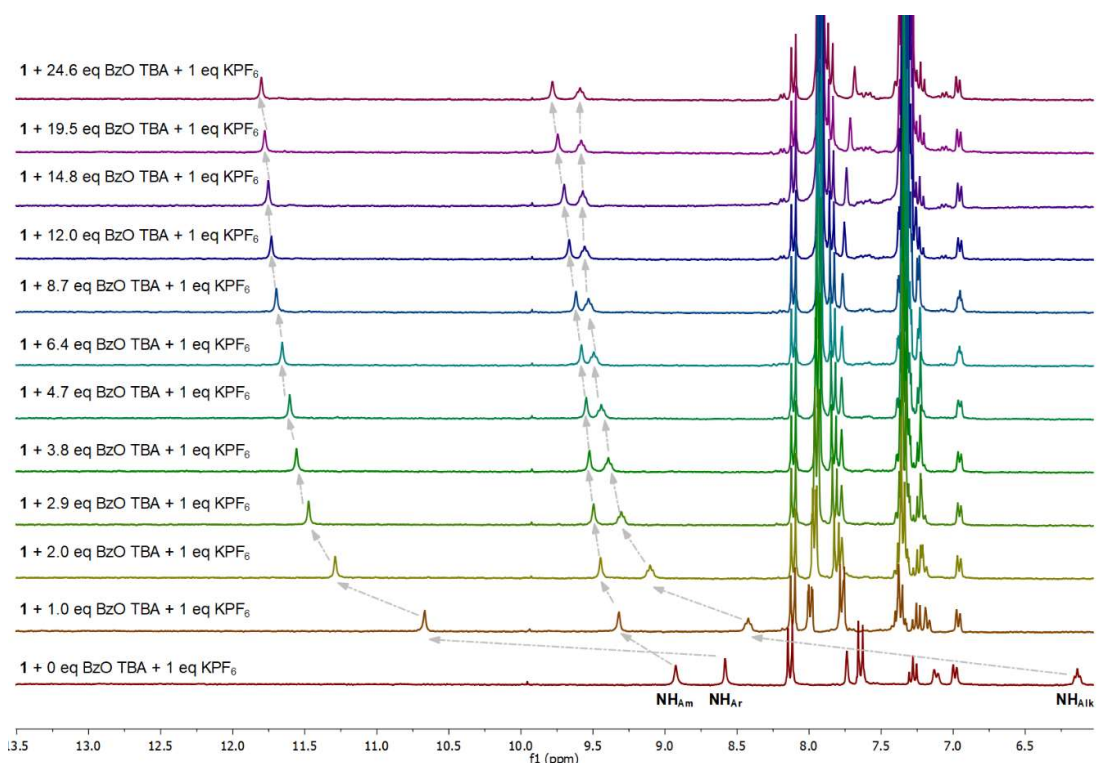

**Figure S27.** Partial <sup>1</sup>H NMR titration experiment of **1** upon titrant (TBAOBz) addition in presence of 1eq. KPF<sub>6</sub>, (293 K, 3% H<sub>2</sub>O/CD<sub>3</sub>CN solution,  $C_{\text{titrant}}=2.1 \times 10^{-1}$  M,  $C_{\text{receptor}}=4.0 \times 10^{-3}$  M)

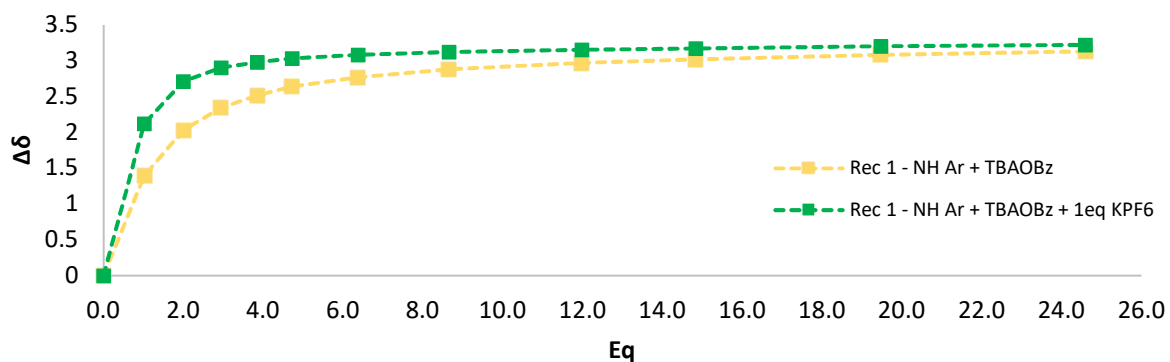

**Figure S28.** <sup>1</sup>H NMR titration binding isotherm of **1** with TBAOBz in the presence or absence of 1 eq. of cations, 3% H<sub>2</sub>O/CD<sub>3</sub>CN solution

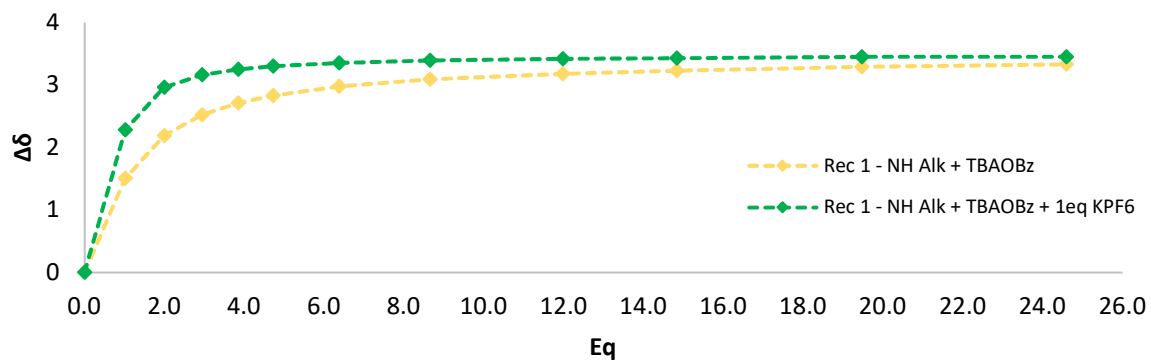

**Figure S29.** <sup>1</sup>H NMR titration binding isotherm of **1** with TBAOBz in the presence or absence of 1 eq. of cations, 3% H<sub>2</sub>O/CD<sub>3</sub>CN solution

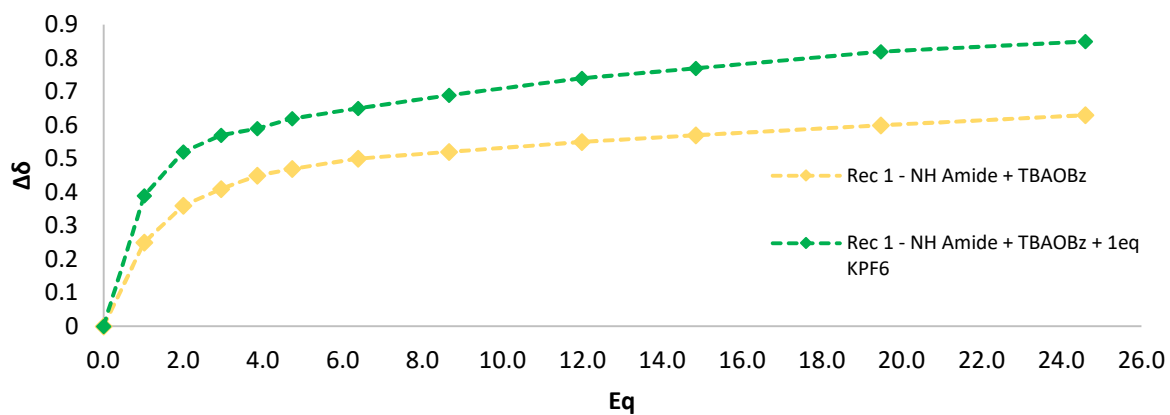

**Figure S30.**  $^1\text{H}$  NMR titration binding isotherm of **1** with TBAOBz in the presence or absence of 1 eq. of cations, 3%  $\text{H}_2\text{O}/\text{CD}_3\text{CN}$  solution

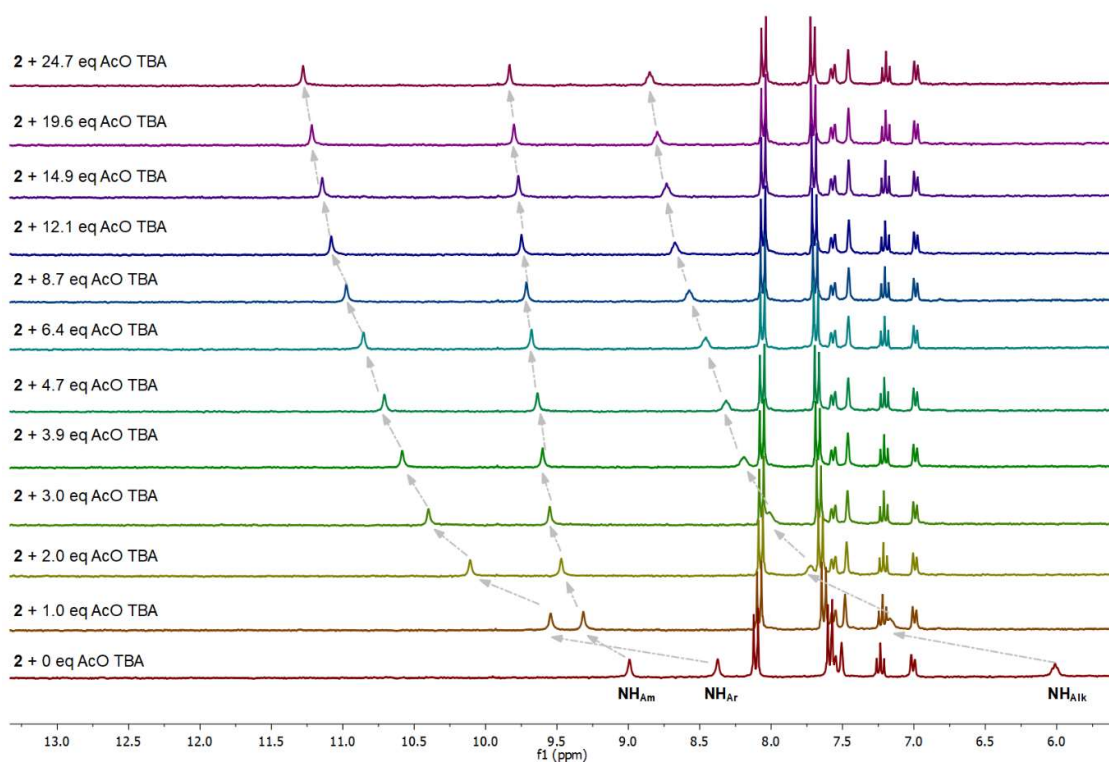

**Figure S31.** Partial  $^1\text{H}$  NMR titration experiment of **2** upon titrant (TBAOAc) addition, (293 K, 3%  $\text{H}_2\text{O}/\text{CD}_3\text{CN}$  solution,  $C_{\text{titrant}}=2.1 \times 10^{-1}$  M,  $C_{\text{receptor}}=4.0 \times 10^{-3}$  M)

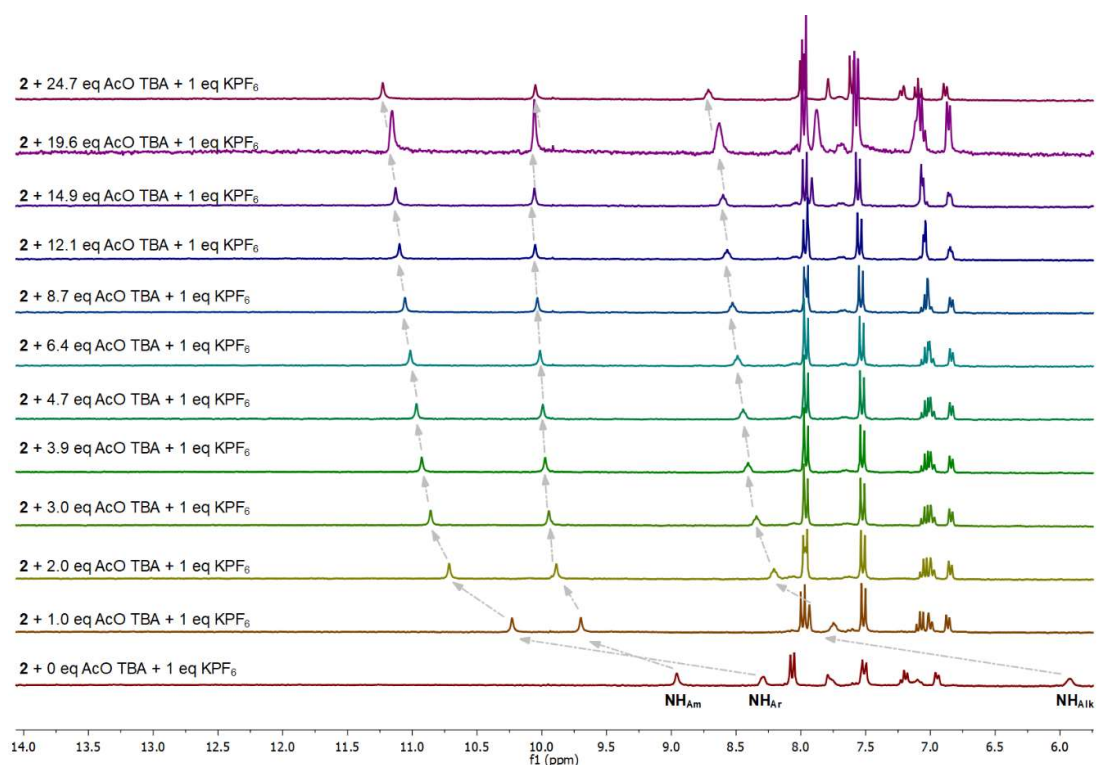

**Figure S32.** Partial  $^1\text{H}$  NMR titration experiment of **2** upon titrant (TBAOAc) addition in presence of 1 eq.  $\text{KPF}_6$ , (293 K, 3%  $\text{H}_2\text{O}/\text{CD}_3\text{CN}$  solution,  $C_{\text{titrant}}=2.1 \times 10^{-1} \text{ M}$ ,  $C_{\text{receptor}}=4.0 \times 10^{-3} \text{ M}$ )

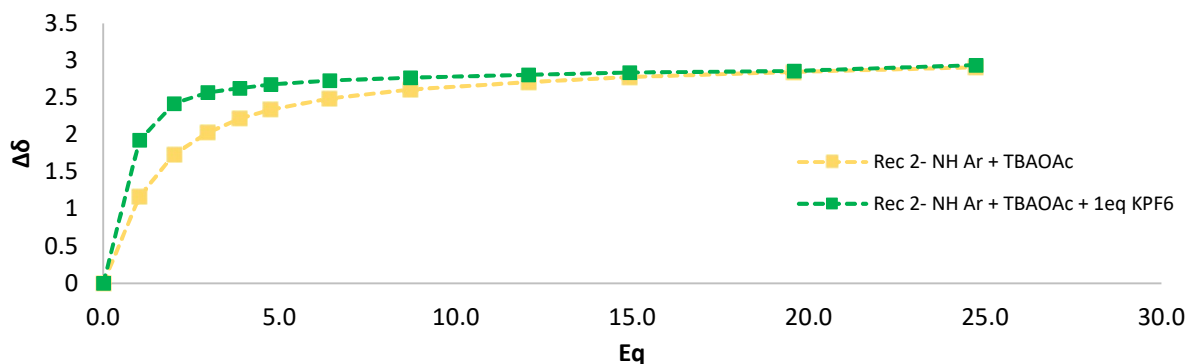

**Figure S33.**  $^1\text{H}$  NMR titration binding isotherm of **2** with TBAOAc in the presence or absence of 1 eq. of cations, 3%  $\text{H}_2\text{O}/\text{CD}_3\text{CN}$  solution

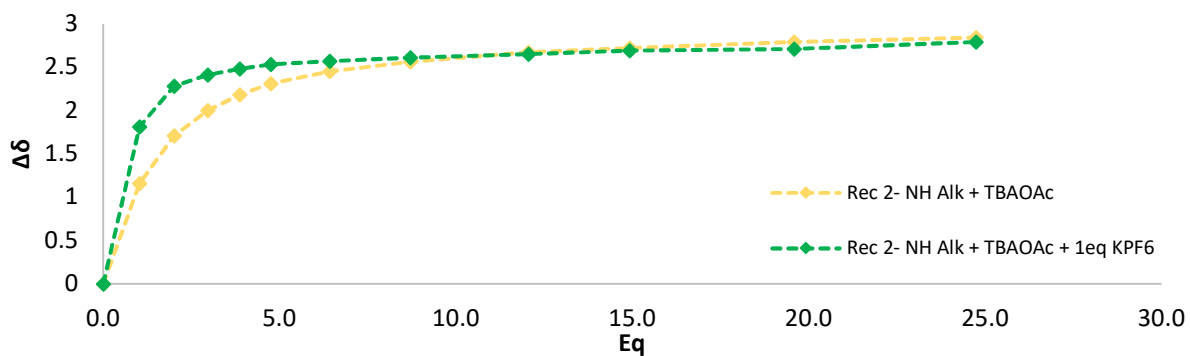

**Figure S34.**  $^1\text{H}$  NMR titration binding isotherm of **2** with TBAOAc in the presence or absence of 1 eq. of cations, 3%  $\text{H}_2\text{O}/\text{CD}_3\text{CN}$  solution

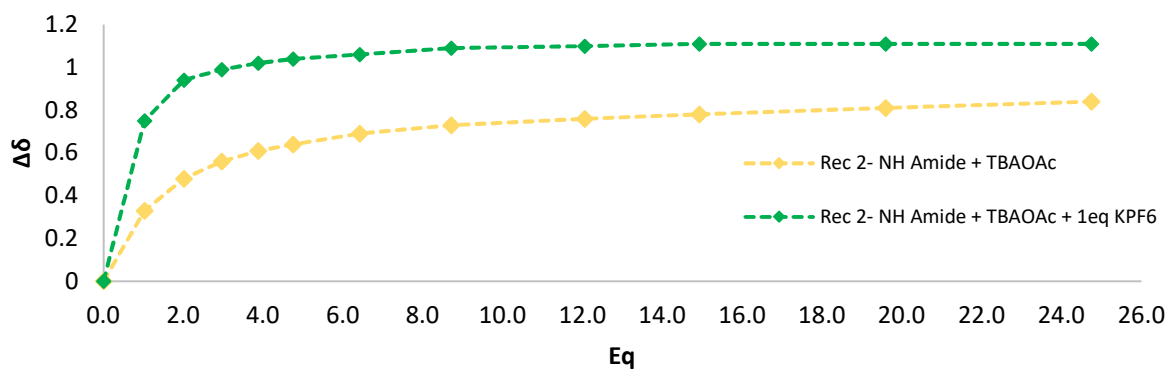

**Figure S35.**  $^1\text{H}$  NMR titration binding isotherm of **2** with TBAOAc in the presence or absence of 1 eq. of cations, 3%  $\text{H}_2\text{O}/\text{CD}_3\text{CN}$  solution

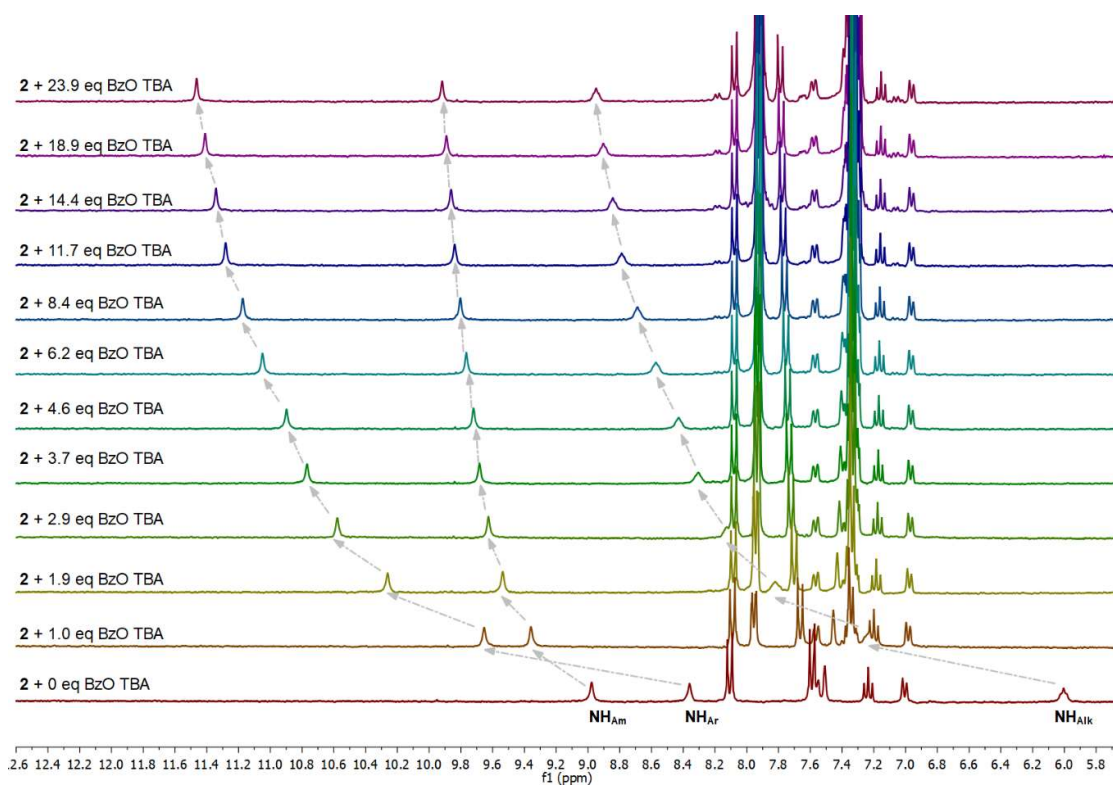

**Figure S36.** Partial  $^1\text{H}$  NMR titration experiment of **2** upon titrant (TBAOBz) addition, (293 K, 3%  $\text{H}_2\text{O}/\text{CD}_3\text{CN}$  solution,  $C_{\text{titrant}}=2.05 \times 10^{-1} \text{ M}$ ,  $C_{\text{receptor}}=4.1 \times 10^{-3} \text{ M}$ )

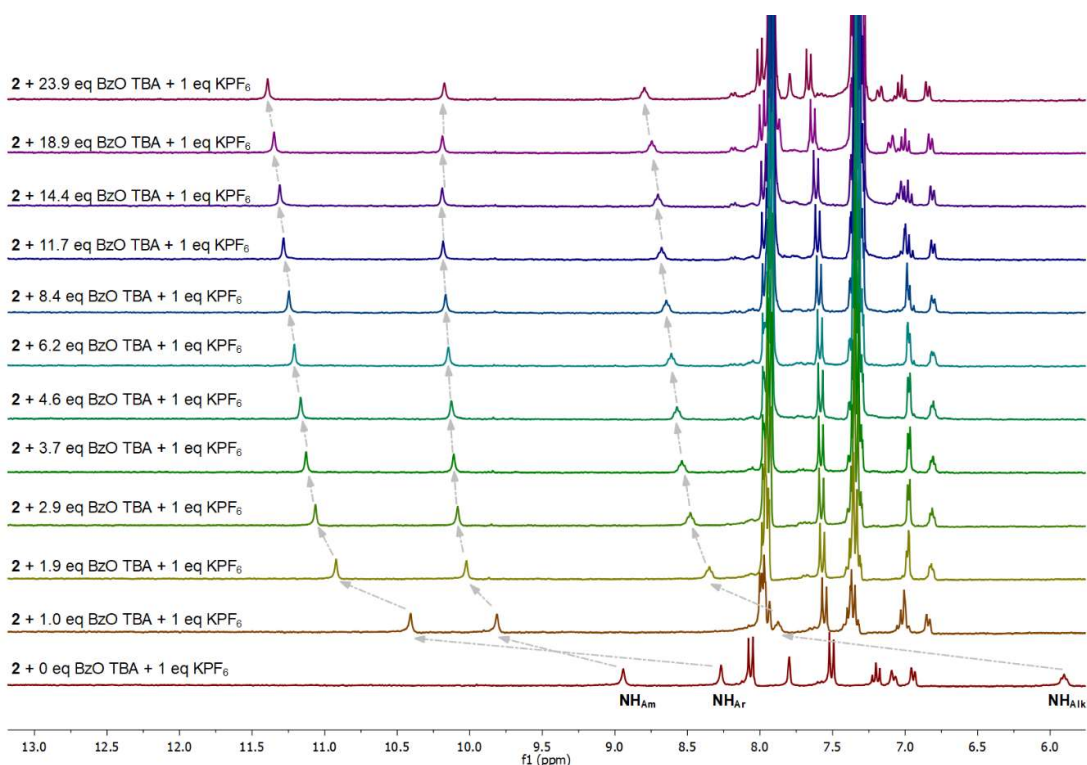

**Figure S37.** Partial  $^1\text{H}$  NMR titration experiment of **2** upon titrant (TBAOBz) addition in presence of 1eq.  $\text{KPF}_6$ , (293 K, 3%  $\text{H}_2\text{O}/\text{CD}_3\text{CN}$  solution,  $C_{\text{titrant}}=2.05 \times 10^{-1} \text{ M}$ ,  $C_{\text{receptor}}=4.1 \times 10^{-3} \text{ M}$ )

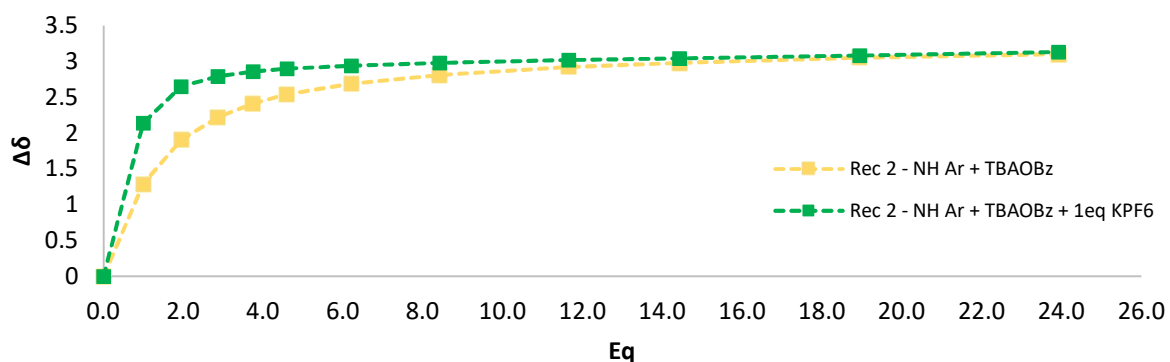

**Figure S38.**  $^1\text{H}$  NMR titration binding isotherm of **2** with TBAOBz in the presence or absence of 1 eq. of cations, 3%  $\text{H}_2\text{O}/\text{CD}_3\text{CN}$  solution

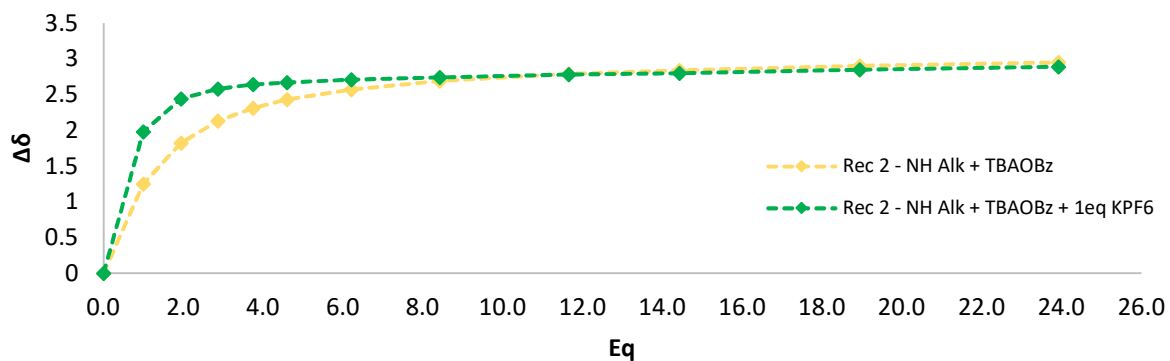

**Figure S39.**  $^1\text{H}$  NMR titration binding isotherm of **2** with TBAOBz in the presence or absence of 1 eq. of cations, 3%  $\text{H}_2\text{O}/\text{CD}_3\text{CN}$  solution

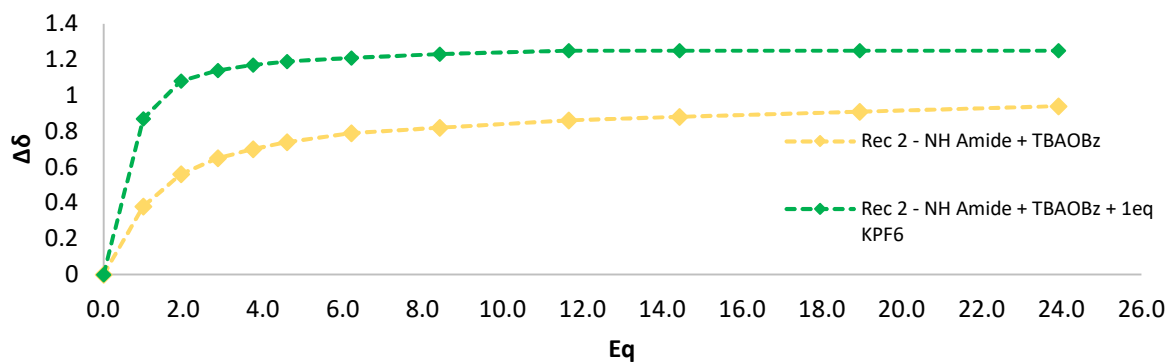

**Figure S40.**  $^1\text{H}$  NMR titration binding isotherm of **2** with TBAOBz in the presence or absence of 1 eq. of cations, 3%  $\text{H}_2\text{O}/\text{CD}_3\text{CN}$  solution

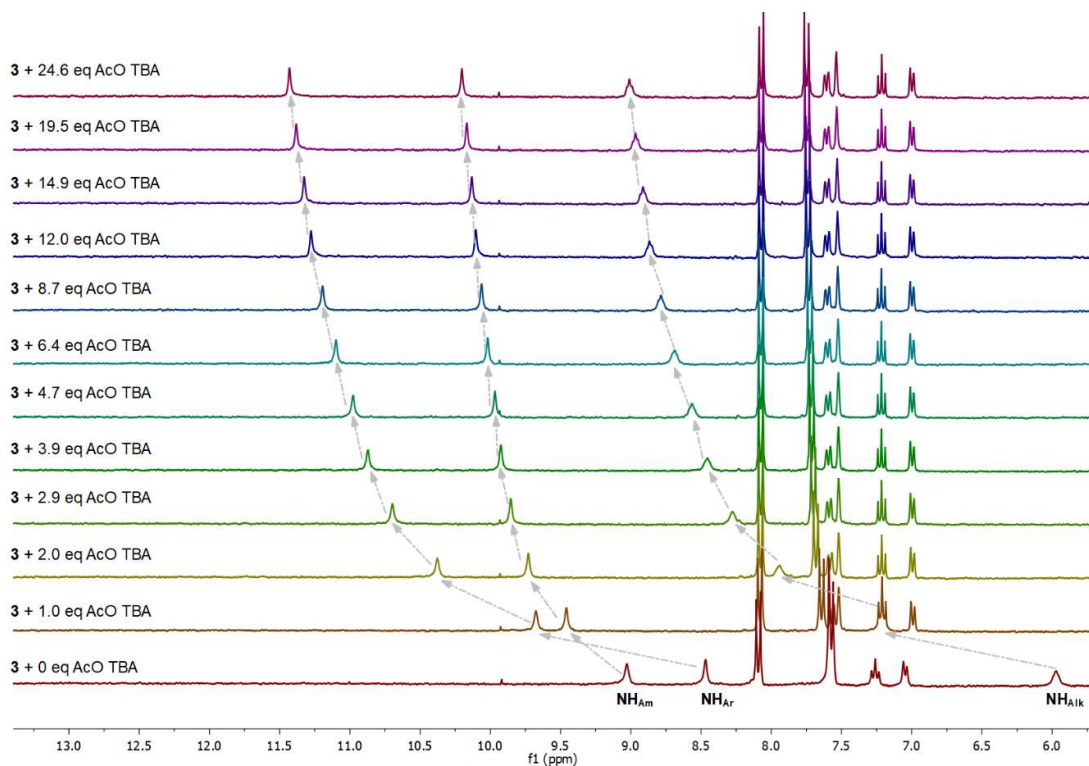

**Figure S41.** Partial  $^1\text{H}$  NMR titration experiment of **3** upon titrant (TBAOAc) addition, (293 K, 3%  $\text{H}_2\text{O}/\text{CD}_3\text{CN}$  solution,  $C_{\text{titrant}}=2.1 \times 10^{-1} \text{ M}$ ,  $C_{\text{receptor}}=4.0 \times 10^{-3} \text{ M}$ )

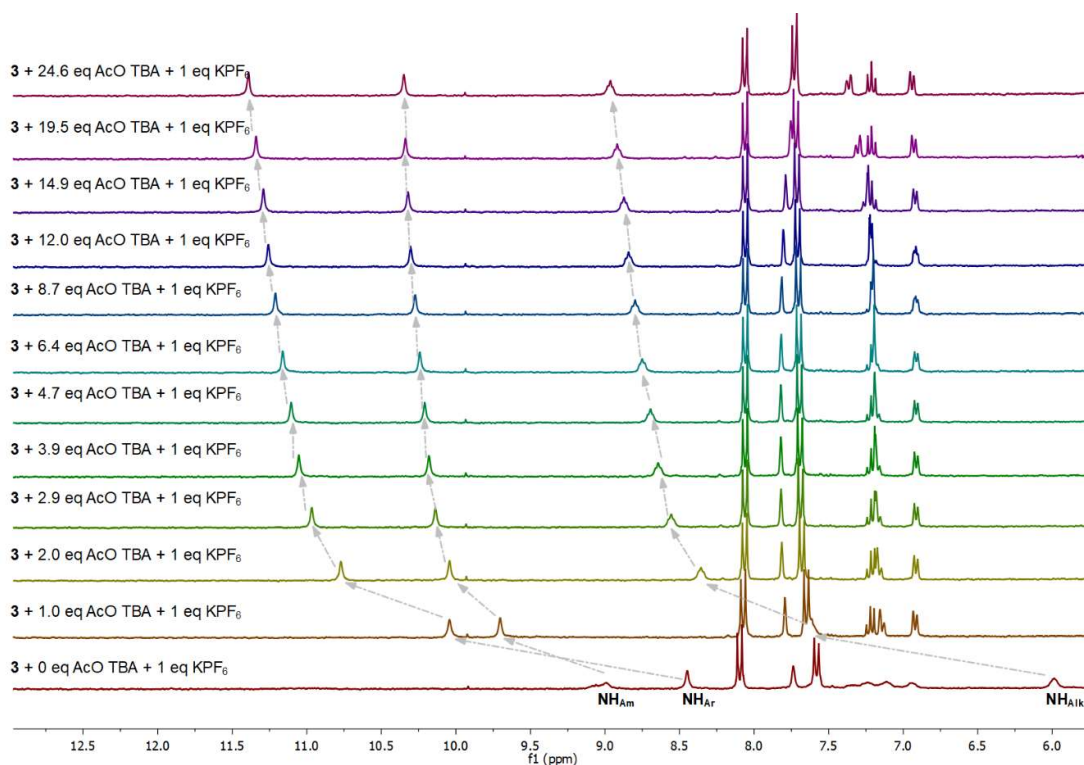

**Figure S42.** Partial  $^1\text{H}$  NMR titration experiment of **3** upon titrant (TBAOAc) addition in presence of 1eq.  $\text{KPF}_6$ , (293 K, 3%  $\text{H}_2\text{O}/\text{CD}_3\text{CN}$  solution,  $C_{\text{titrant}}=2.1 \times 10^{-1} \text{ M}$ ,  $C_{\text{receptor}}=4.0 \times 10^{-3} \text{ M}$ )

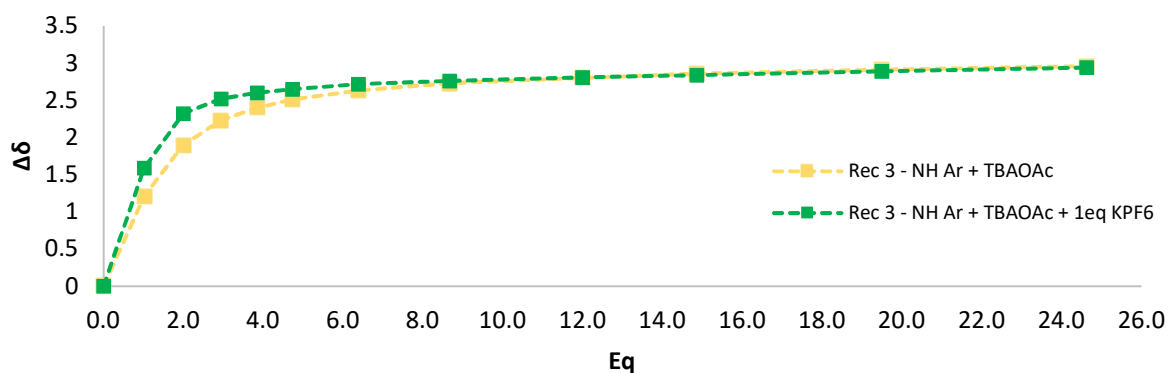

**Figure S43.**  $^1\text{H}$  NMR titration binding isotherm of **3** with TBAOAc in the presence or absence of 1 eq. of cations, 3%  $\text{H}_2\text{O}/\text{CD}_3\text{CN}$  solution

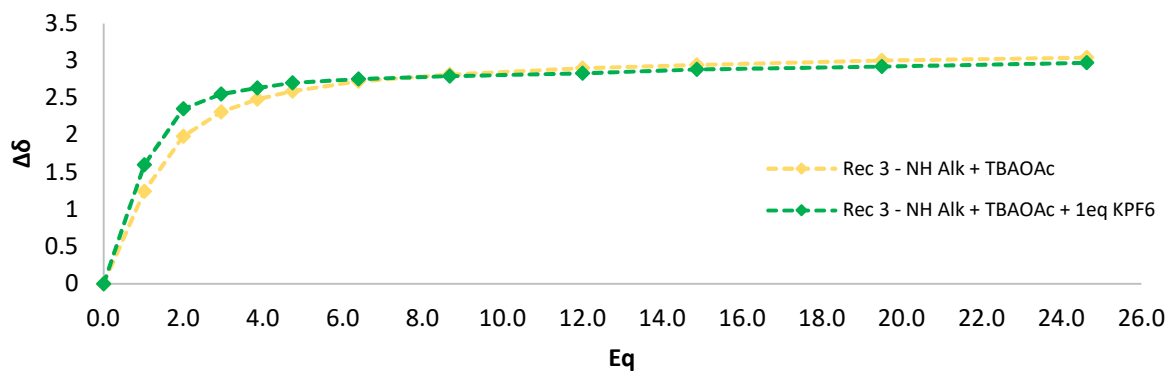

**Figure S44.**  $^1\text{H}$  NMR titration binding isotherm of **3** with TBAOAc in the presence or absence of 1 eq. of cations, 3%  $\text{H}_2\text{O}/\text{CD}_3\text{CN}$  solution

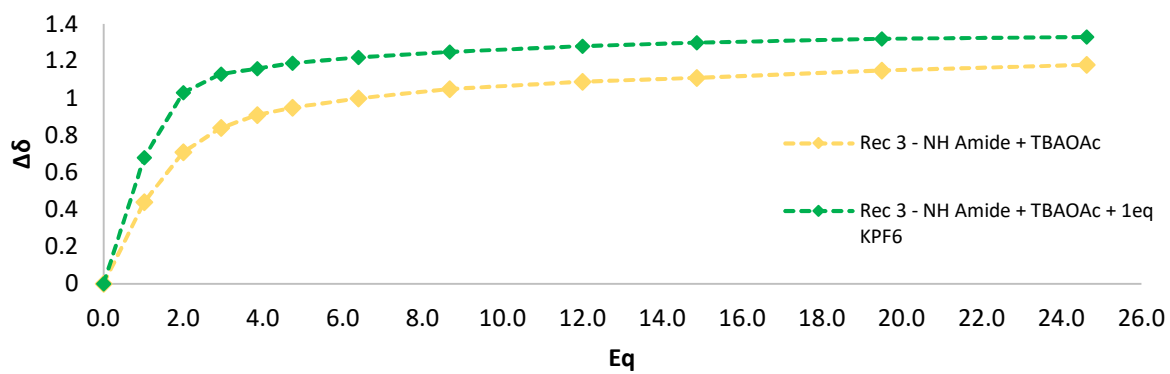

**Figure S45.**  $^1\text{H}$  NMR titration binding isotherm of **3** with TBAOAc in the presence or absence of 1 eq. of cations, 3%  $\text{H}_2\text{O}/\text{CD}_3\text{CN}$  solution

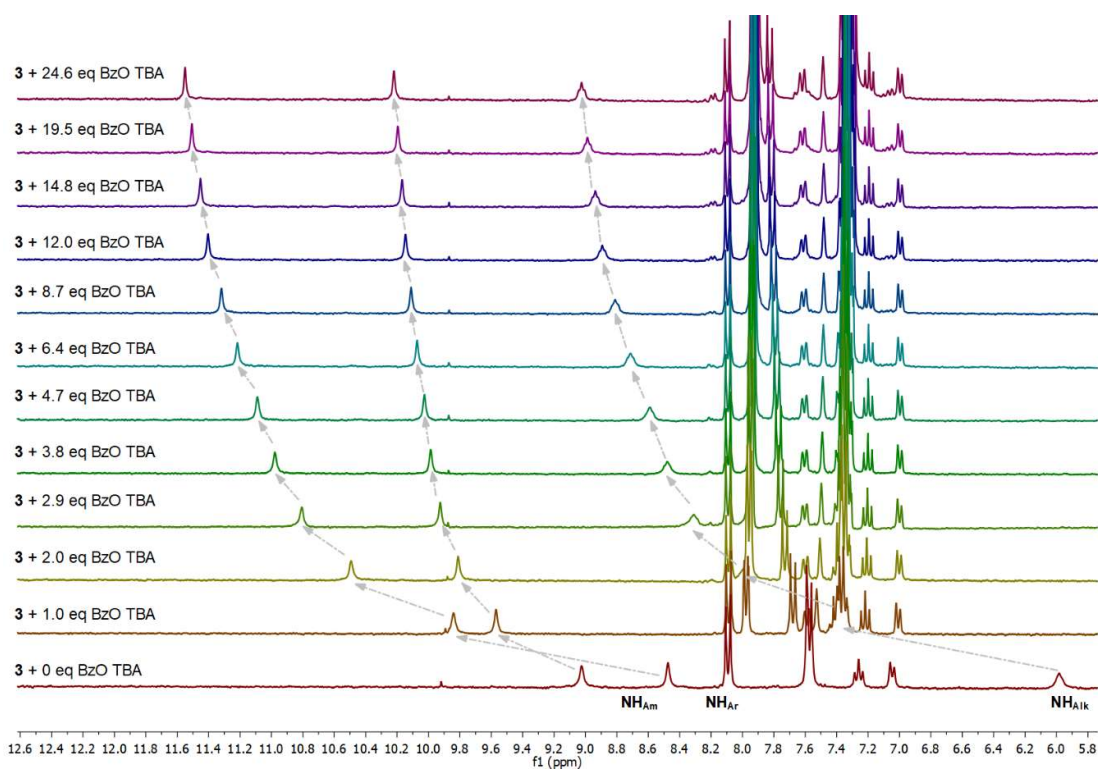

**Figure S46.** Partial  $^1\text{H}$  NMR titration experiment of **3** upon titrant (TBAOBz) addition, (293 K, 3%  $\text{H}_2\text{O}/\text{CD}_3\text{CN}$  solution,  $C_{\text{titrant}}=2.1 \times 10^{-1} \text{ M}$ ,  $C_{\text{receptor}}=4.0 \times 10^{-3} \text{ M}$ )



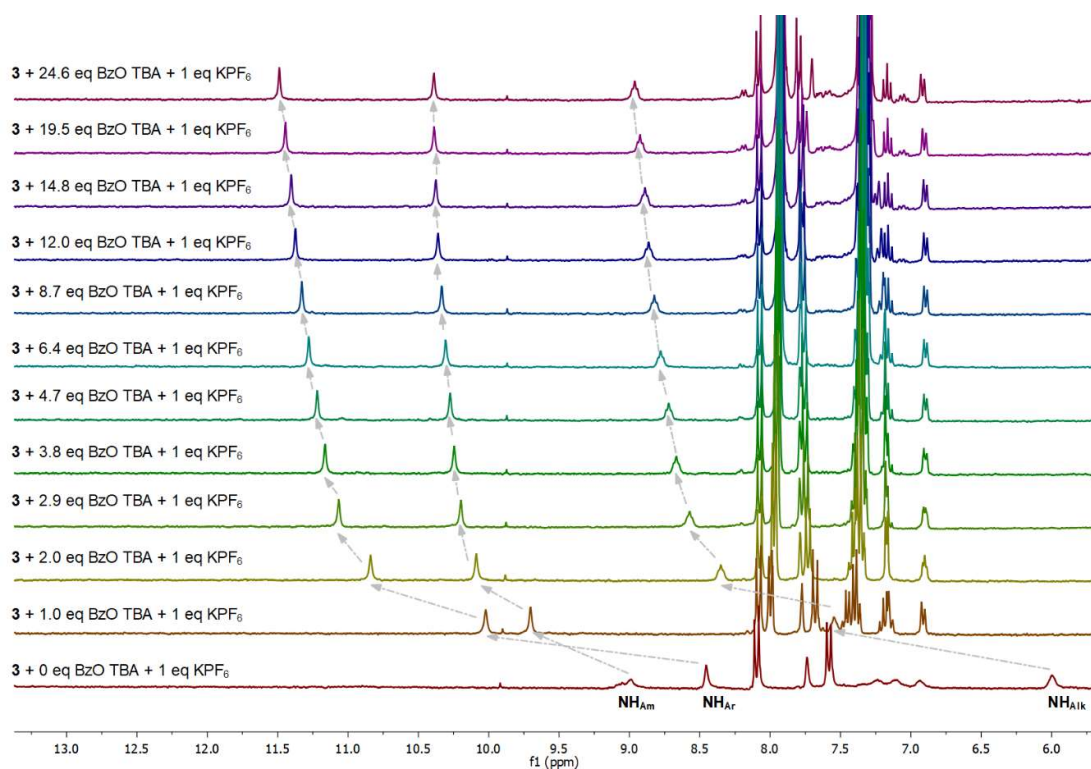

**Figure S47.** Partial  $^1\text{H}$  NMR titration experiment of **3** upon titrant (TBAOBz) addition in presence of 1eq.  $\text{KPF}_6$ , (293 K, 3%  $\text{H}_2\text{O}/\text{CD}_3\text{CN}$  solution,  $C_{\text{titrant}}=2.1 \times 10^{-1} \text{ M}$ ,  $C_{\text{receptor}}=4.0 \times 10^{-3} \text{ M}$ )

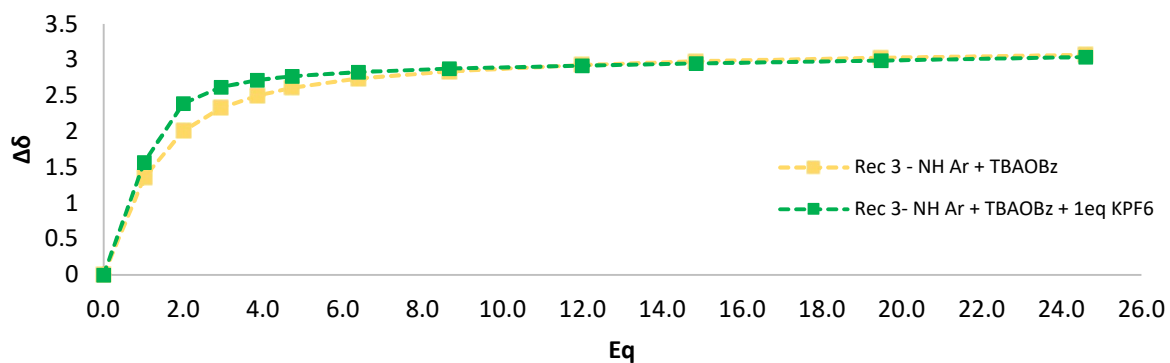

**Figure S48.**  $^1\text{H}$  NMR titration binding isotherm of **3** with TBAOBz in the presence or absence of 1 eq. of cations, 3%  $\text{H}_2\text{O}/\text{CD}_3\text{CN}$  solution

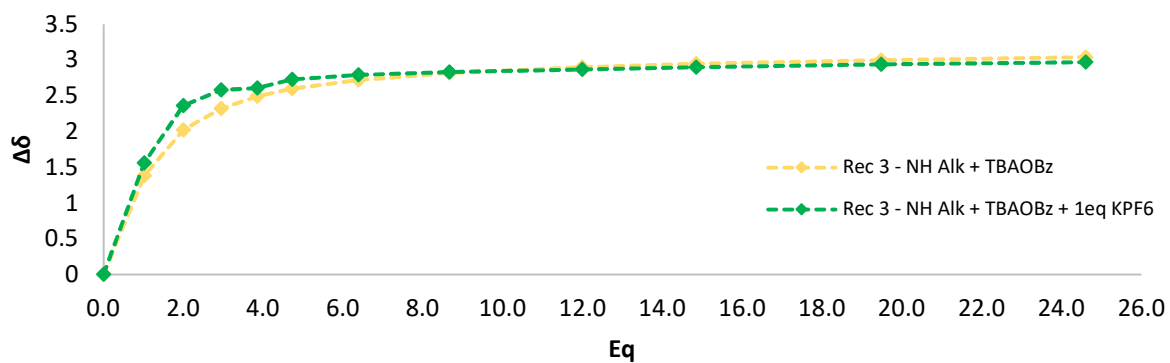

**Figure S49.**  $^1\text{H}$  NMR titration binding isotherm of **3** with TBAOBz in the presence or absence of 1 eq. of cations, 3%  $\text{H}_2\text{O}/\text{CD}_3\text{CN}$  solution

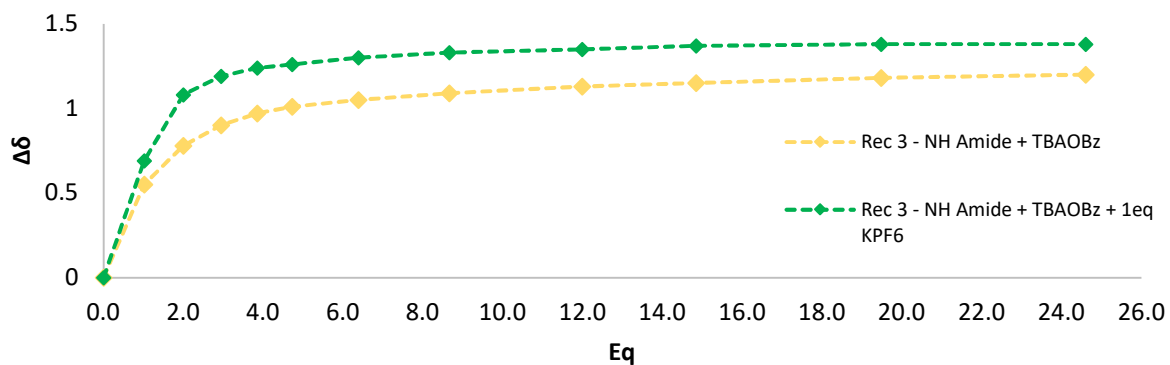

**Figure S50.**  $^1\text{H}$  NMR titration binding isotherm of **3** with TBAOBz in the presence or absence of 1 eq. of cations, 3%  $\text{H}_2\text{O}/\text{CD}_3\text{CN}$  solution

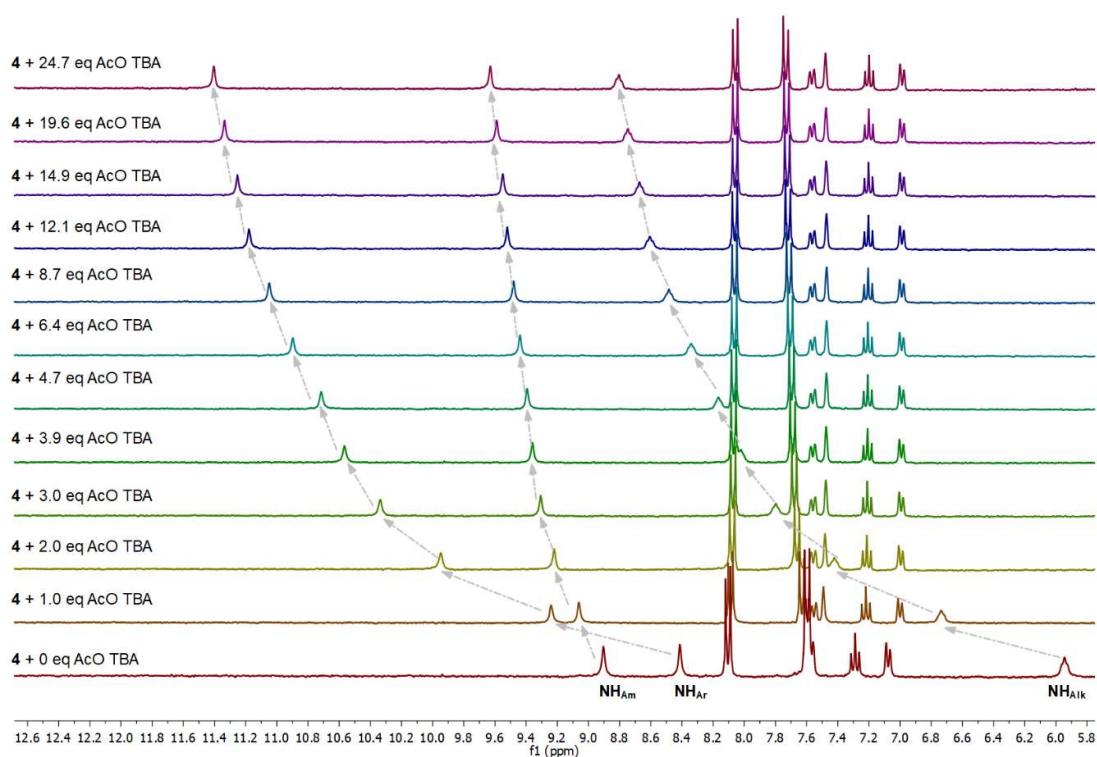

**Figure S51.** Partial  $^1\text{H}$  NMR titration experiment of **4** upon titrant (TBAOAc) addition, (293 K, 3%  $\text{H}_2\text{O}/\text{CD}_3\text{CN}$  solution,  $C_{\text{titrant}}=2.1 \times 10^{-3} \text{ M}$ ,  $C_{\text{receptor}}=4.0 \times 10^{-3} \text{ M}$ )

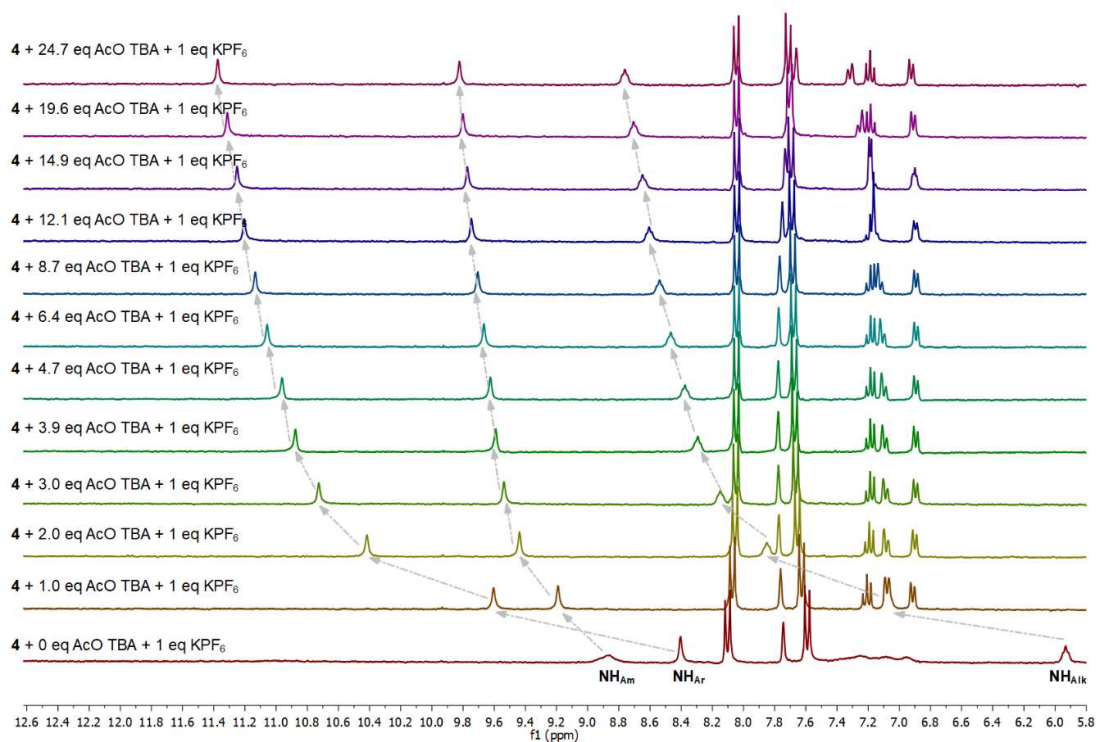

**Figure S52.** Partial  $^1\text{H}$  NMR titration experiment of **4** upon titrant (TBAOAc) addition in presence of 1eq.  $\text{KPF}_6$ , (293 K, 3%  $\text{H}_2\text{O}/\text{CD}_3\text{CN}$  solution,  $C_{\text{titrant}}=2.1 \times 10^{-1} \text{ M}$ ,  $C_{\text{receptor}}=4.0 \times 10^{-3} \text{ M}$ )

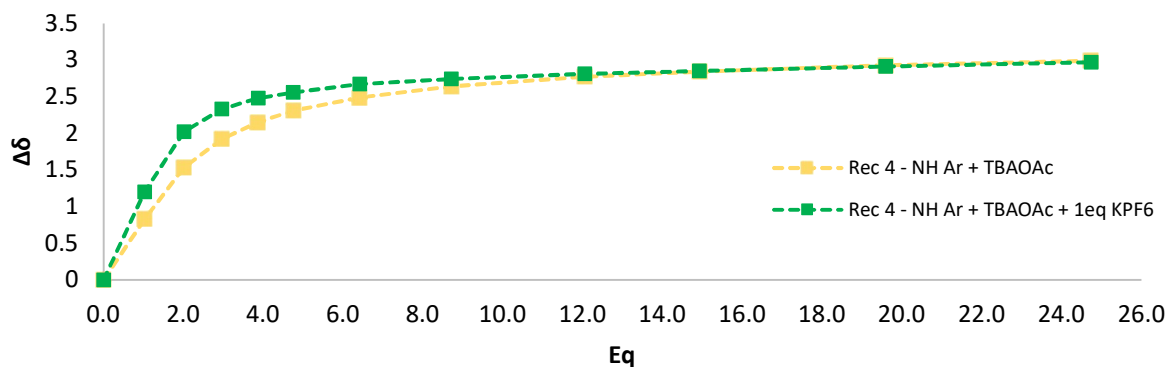

**Figure S53.**  $^1\text{H}$  NMR titration binding isotherm of **4** with TBAOAc in the presence or absence of 1 eq. of cations, 3%  $\text{H}_2\text{O}/\text{CD}_3\text{CN}$  solution

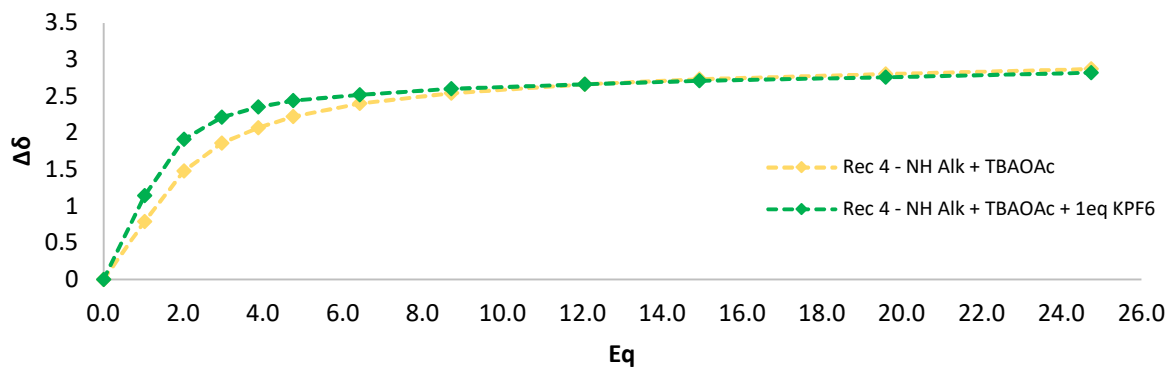

**Figure S54.**  $^1\text{H}$  NMR titration binding isotherm of **4** with TBAOAc in the presence or absence of 1 eq. of cations, 3%  $\text{H}_2\text{O}/\text{CD}_3\text{CN}$  solution

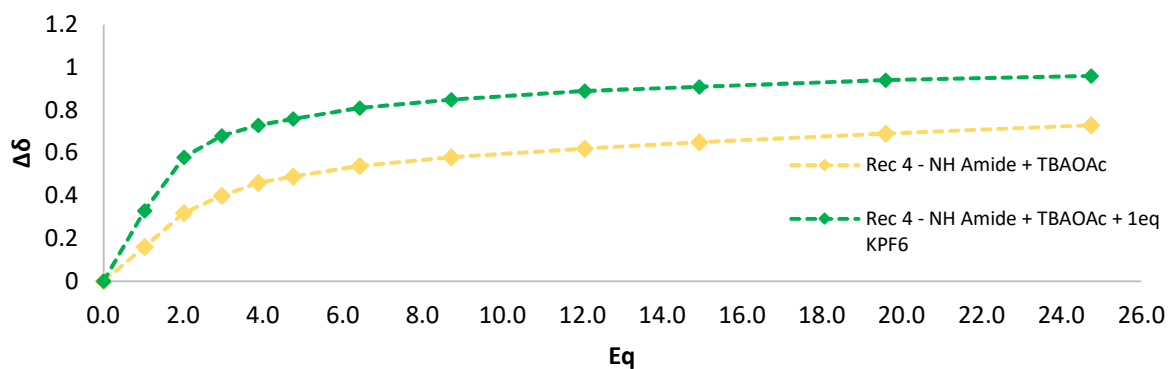

**Figure S55.**  $^1\text{H}$  NMR titration binding isotherm of **4** with TBAOAc in the presence or absence of 1 eq. of cations, 3%  $\text{H}_2\text{O}/\text{CD}_3\text{CN}$  solution

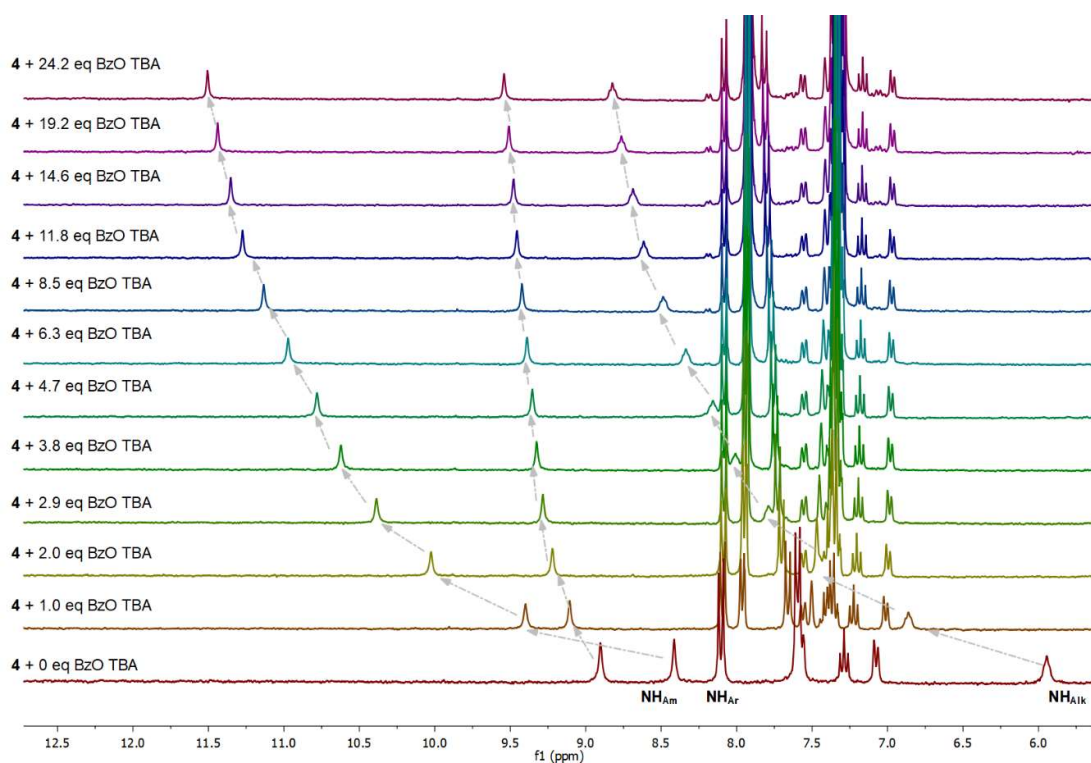

**Figure S56.** Partial  $^1\text{H}$  NMR titration experiment of **4** upon titrant (TBAOBz) addition, (293 K, 3%  $\text{H}_2\text{O}/\text{CD}_3\text{CN}$  solution,  $C_{\text{titrant}}=2.1 \times 10^{-1} \text{ M}$ ,  $C_{\text{receptor}}=4.0 \times 10^{-3} \text{ M}$ )

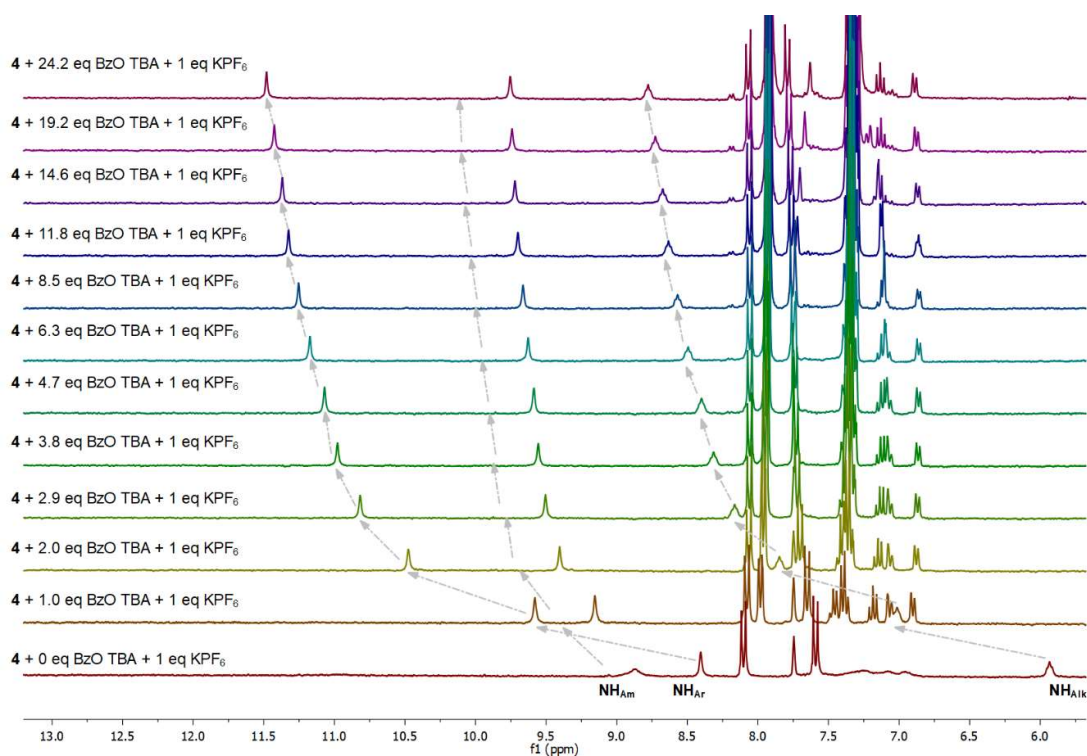

**Figure S57.** Partial  $^1\text{H}$  NMR titration experiment of **4** upon titrant (TBAOBz) addition in presence of 1eq.  $\text{KPF}_6$ , (293 K, 3%  $\text{H}_2\text{O}/\text{CD}_3\text{CN}$  solution,  $C_{\text{titrant}}=2.1 \times 10^{-1} \text{ M}$ ,  $C_{\text{receptor}}=4.0 \times 10^{-3} \text{ M}$ )

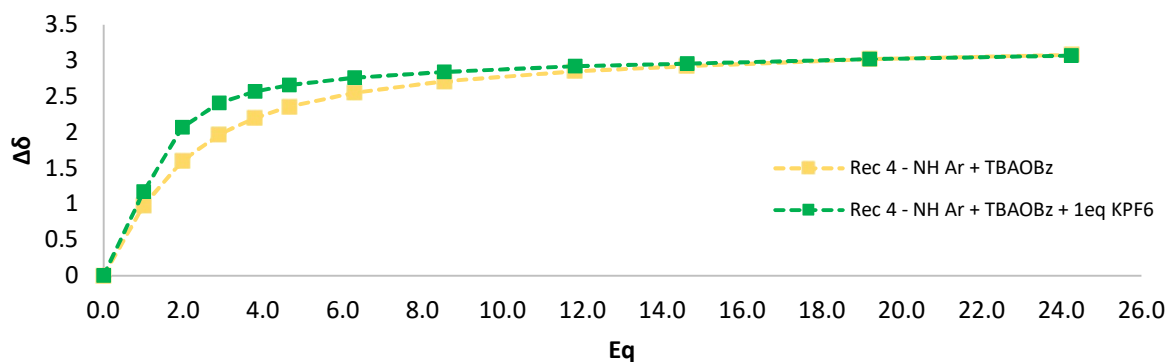

**Figure S58.**  $^1\text{H}$  NMR titration binding isotherm of **4** with TBAOBz in the presence or absence of 1 eq. of cations, 3%  $\text{H}_2\text{O}/\text{CD}_3\text{CN}$  solution

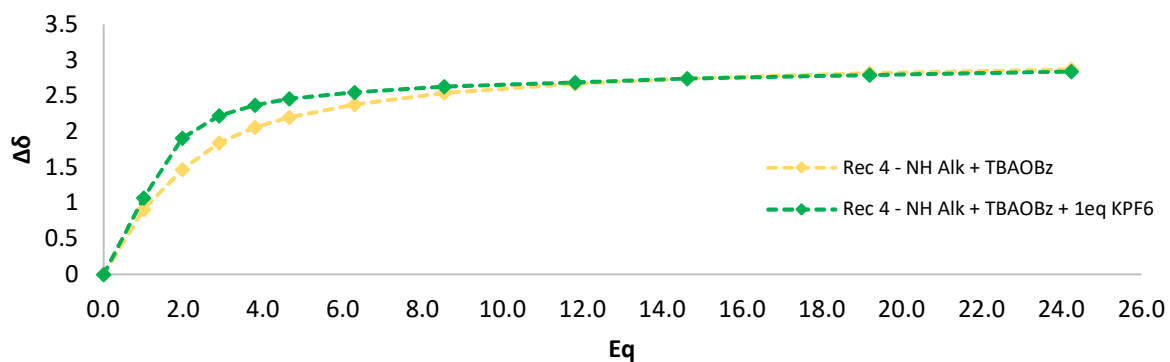

**Figure S59.**  $^1\text{H}$  NMR titration binding isotherm of **4** with TBAOBz in the presence or absence of 1 eq. of cations, 3%  $\text{H}_2\text{O}/\text{CD}_3\text{CN}$  solution

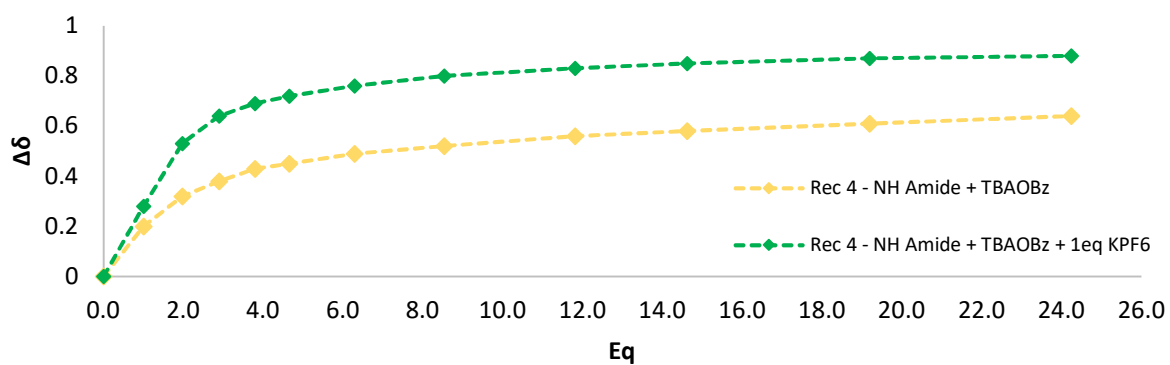

**Figure S60.**  $^1\text{H}$  NMR titration binding isotherm of **4** with TBAOBz in the presence or absence of 1 eq. of cations, 3%  $\text{H}_2\text{O}/\text{CD}_3\text{CN}$  solution

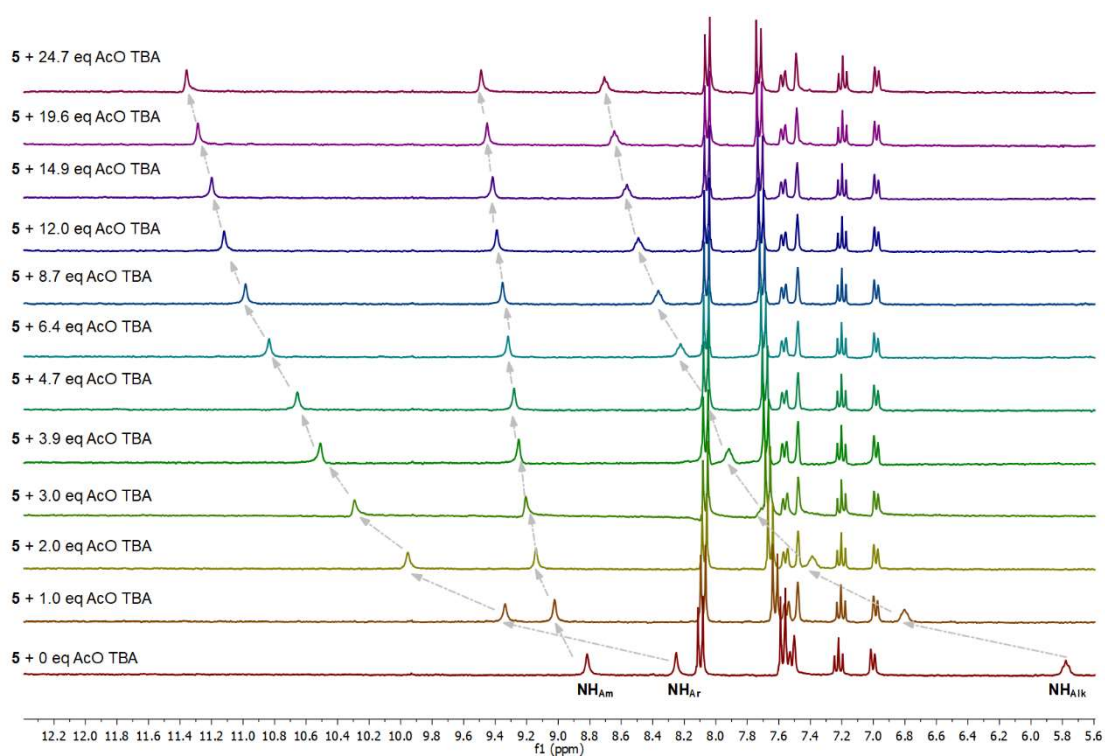

**Figure S61.** Partial  $^1\text{H}$  NMR titration experiment of **5** upon titrant (TBAOAc) addition, (293 K, 3%  $\text{H}_2\text{O}/\text{CD}_3\text{CN}$  solution,  $C_{\text{titrant}}=2.0 \times 10^{-3} \text{ M}$ ,  $C_{\text{receptor}}=4.0 \times 10^{-3} \text{ M}$ )

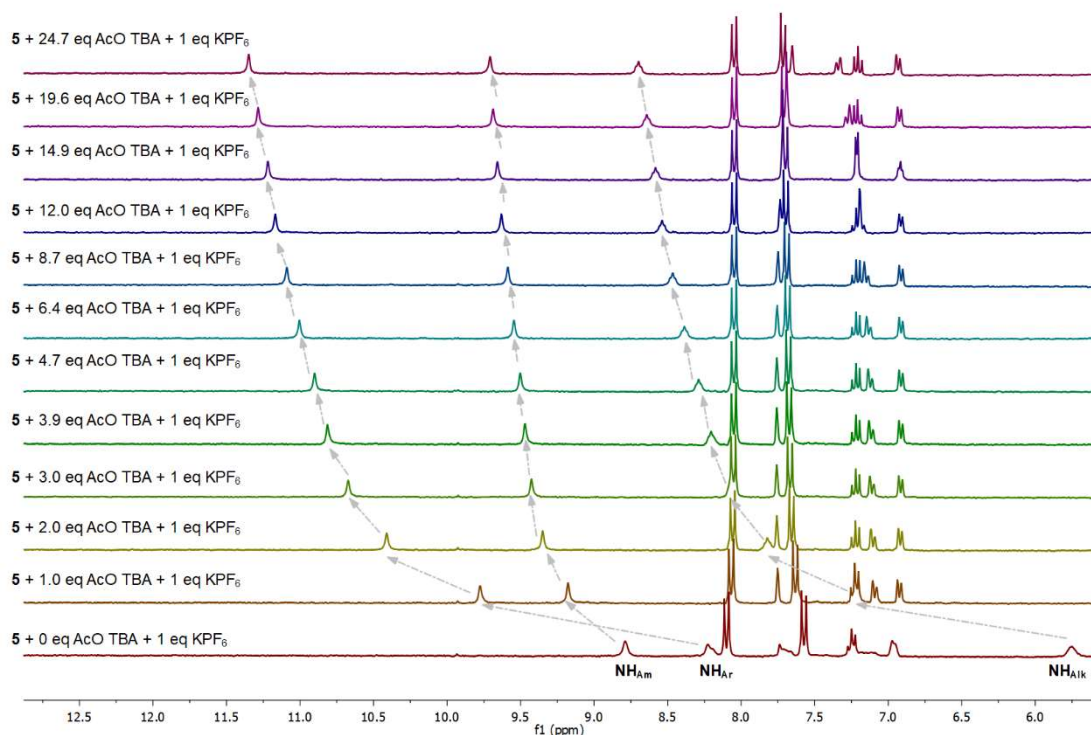

**Figure S62.** Partial <sup>1</sup>H NMR titration experiment of **5** upon titrant (TBAOAc) addition in presence of 1eq. KPF<sub>6</sub>, (293 K, 3% H<sub>2</sub>O/CD<sub>3</sub>CN solution, C<sub>titrant</sub>=2.0 x10<sup>-1</sup> M, C<sub>receptor</sub>=4.0 x10<sup>-3</sup> M)

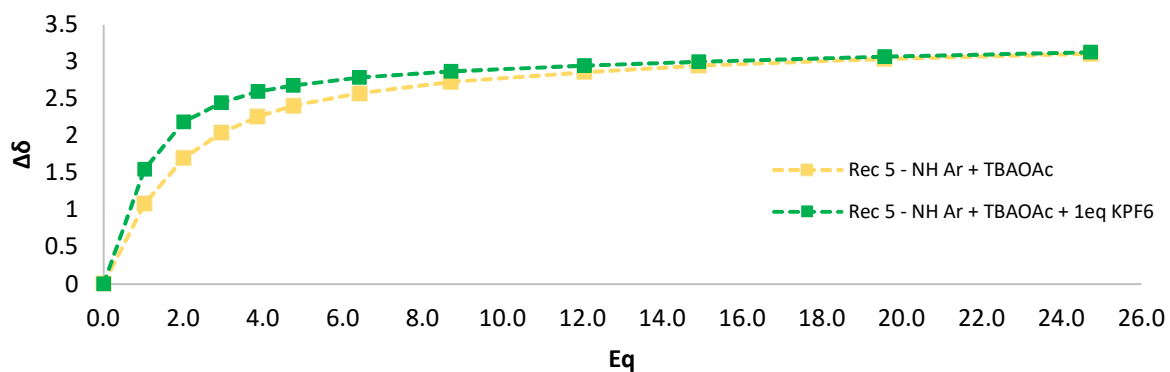

**Figure S63.** <sup>1</sup>H NMR titration binding isotherm of **5** with TBAOAc in the presence or absence of 1 eq. of cations, 3% H<sub>2</sub>O/CD<sub>3</sub>CN solution

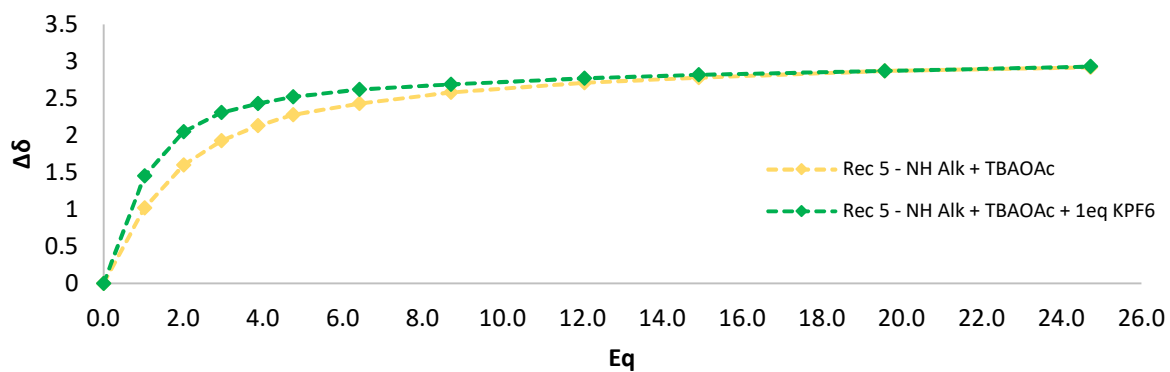

**Figure S64.** <sup>1</sup>H NMR titration binding isotherm of **5** with TBAOAc in the presence or absence of 1 eq. of cations, 3% H<sub>2</sub>O/CD<sub>3</sub>CN solution

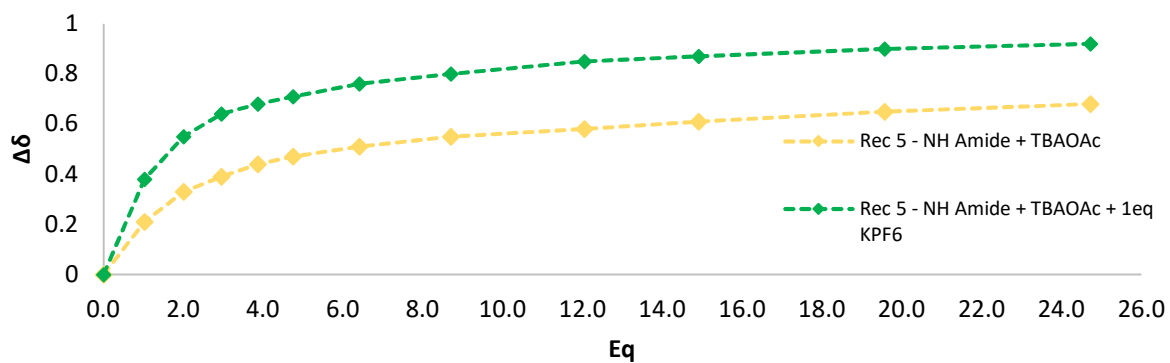

**Figure S65.**  $^1\text{H}$  NMR titration binding isotherm of **5** with TBAOAc in the presence or absence of 1 eq. of cations, 3%  $\text{H}_2\text{O}/\text{CD}_3\text{CN}$  solution

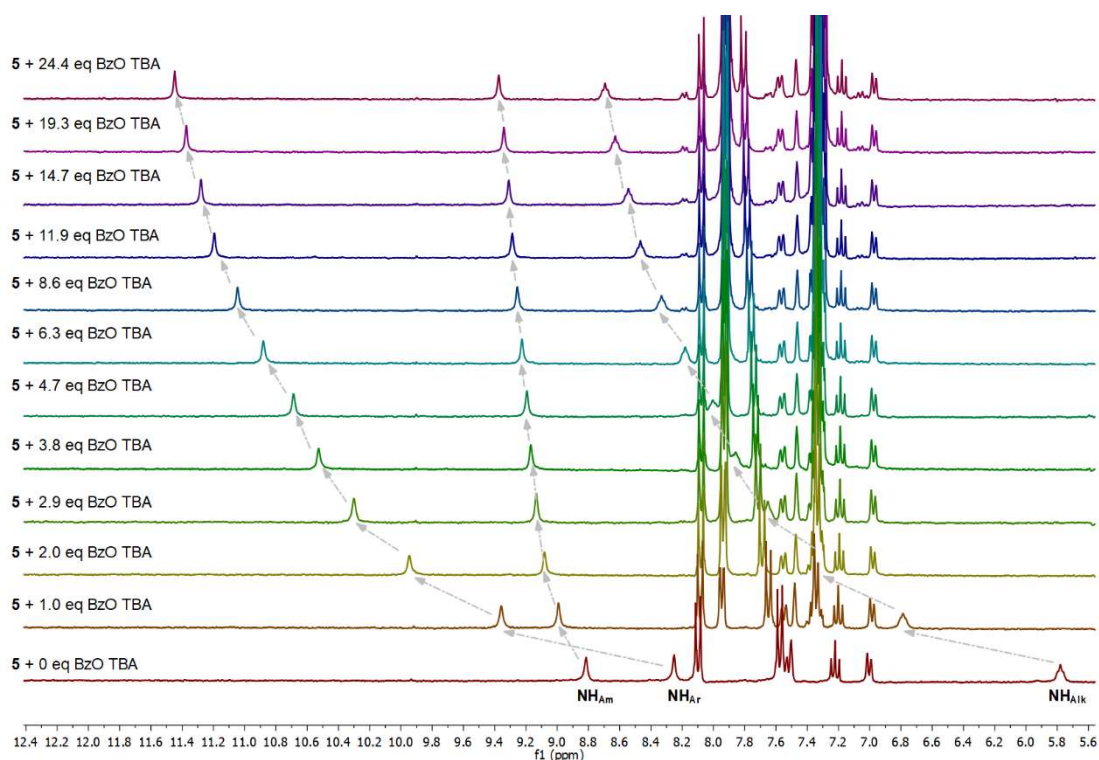

**Figure S66.** Partial  $^1\text{H}$  NMR titration experiment of **5** upon titrant (TBAOBz) addition, (293 K, 3%  $\text{H}_2\text{O}/\text{CD}_3\text{CN}$  solution,  $C_{\text{titrant}}=2.1 \times 10^{-1} \text{ M}$ ,  $C_{\text{receptor}}=4.0 \times 10^{-3} \text{ M}$ )



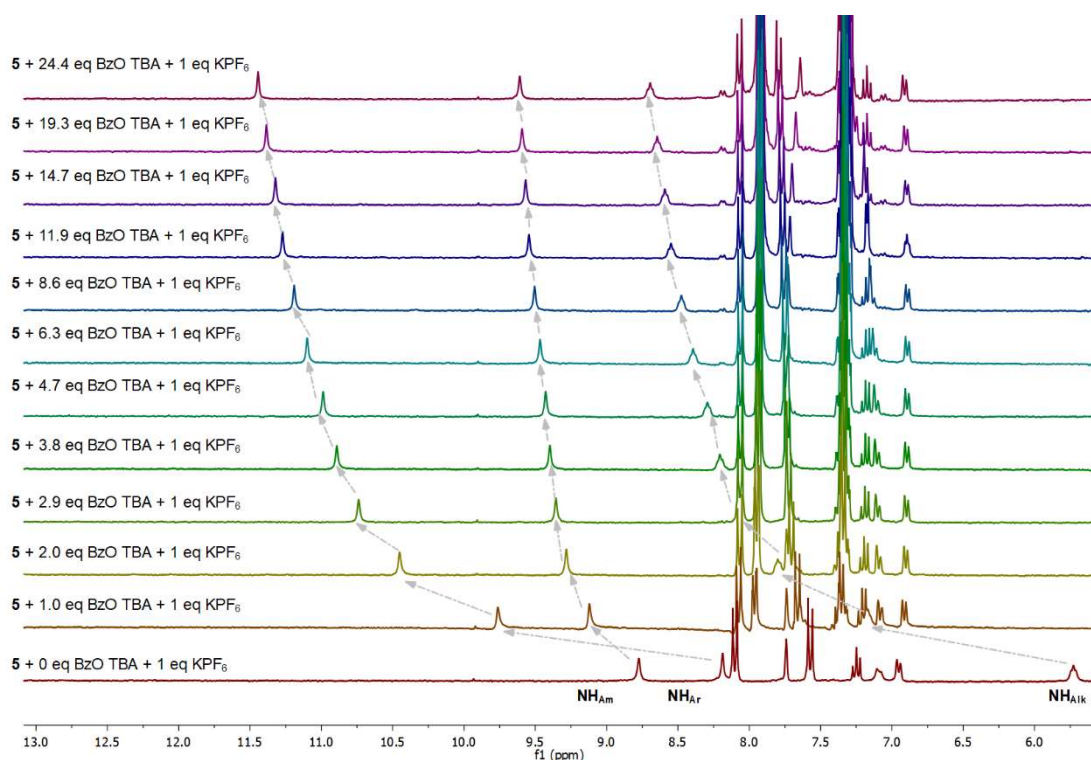

**Figure S67.** Partial  $^1\text{H}$  NMR titration experiment of **5** upon titrant (TBAOBz) addition in presence of 1eq.  $\text{KPF}_6$ , (293 K, 3%  $\text{H}_2\text{O}/\text{CD}_3\text{CN}$  solution,  $C_{\text{titrant}}=2.1 \times 10^{-1} \text{ M}$ ,  $C_{\text{receptor}}=4.0 \times 10^{-3} \text{ M}$ )

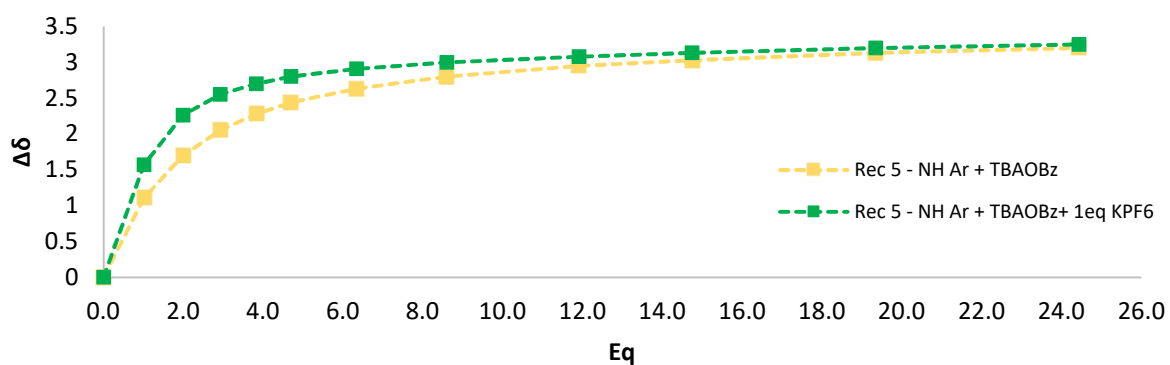

**Figure S68.**  $^1\text{H}$  NMR titration binding isotherm of **5** with TBAOBz in the presence or absence of 1 eq. of cations, 3%  $\text{H}_2\text{O}/\text{CD}_3\text{CN}$  solution

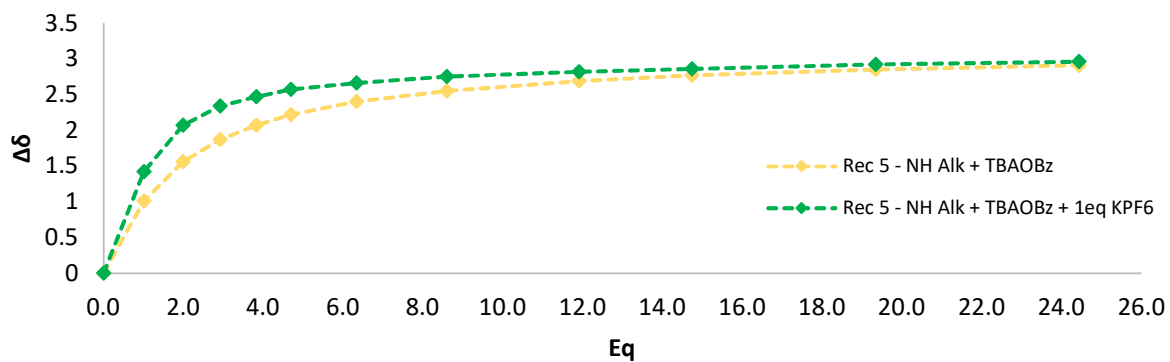

**Figure S69.**  $^1\text{H}$  NMR titration binding isotherm of **5** with TBAOBz in the presence or absence of 1 eq. of cations, 3%  $\text{H}_2\text{O}/\text{CD}_3\text{CN}$  solution

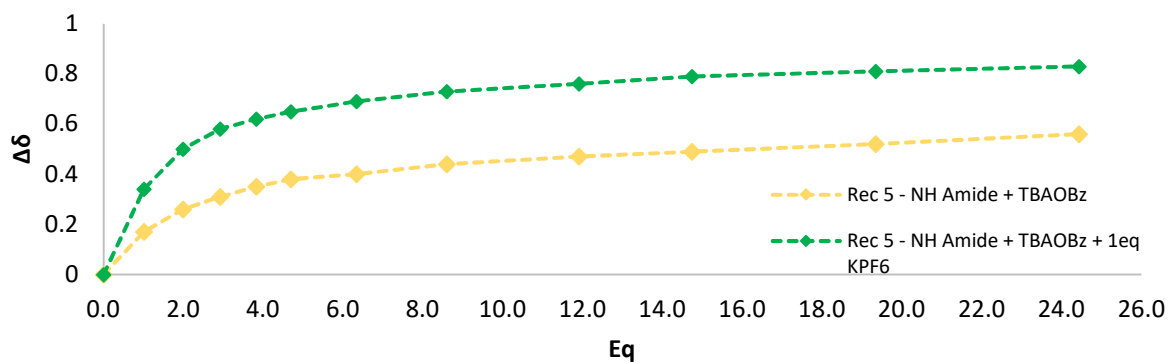

**Figure S70.**  $^1\text{H}$  NMR titration binding isotherm of **5** with TBAOBz in the presence or absence of 1 eq. of cations, 3%  $\text{H}_2\text{O}/\text{CD}_3\text{CN}$  solution

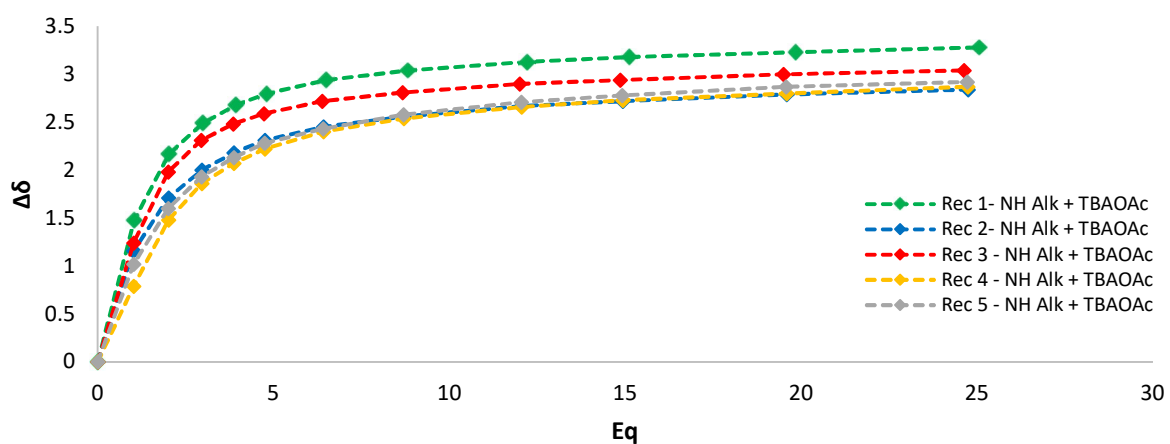

**Figure S71.**  $^1\text{H}$  NMR titration binding isotherm of receptors **1-5** with TBAOAc, 3%  $\text{H}_2\text{O}/\text{CD}_3\text{CN}$  solution

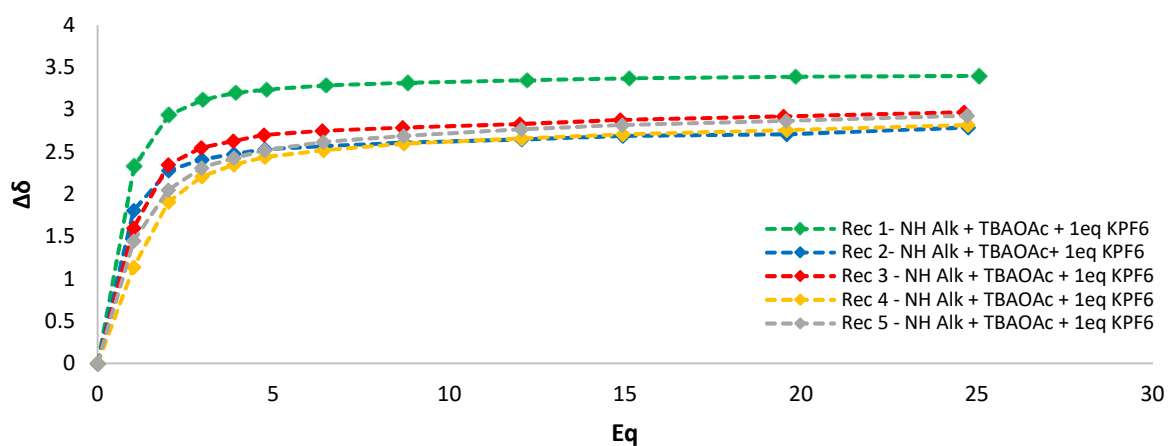

**Figure S72.**  $^1\text{H}$  NMR titration binding isotherm of receptors **1-5** with TBAOAc in the presence or absence of 1 eq. of cations, 3%  $\text{H}_2\text{O}/\text{CD}_3\text{CN}$  solution

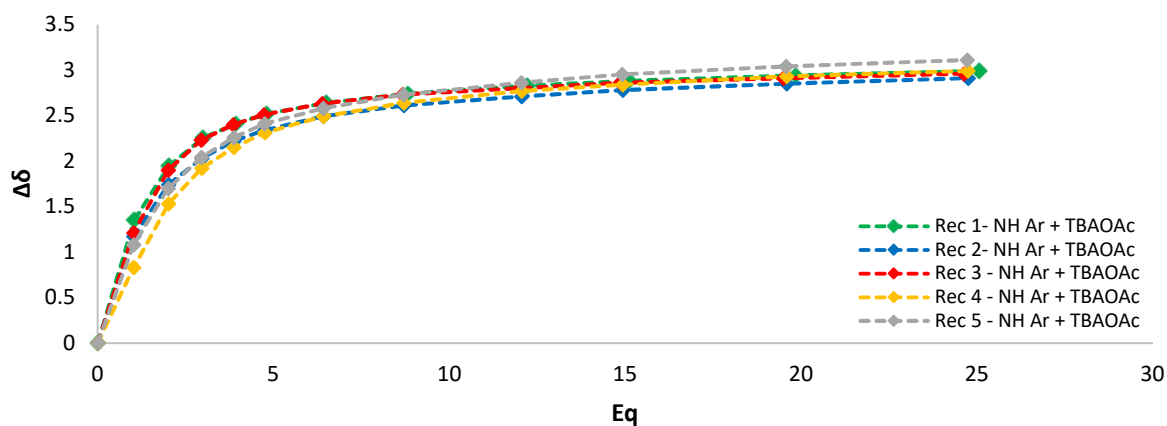

**Figure S73.**  $^1\text{H}$  NMR titration binding isotherm of receptors **1-5** with TBAOAc, 3%  $\text{H}_2\text{O}/\text{CD}_3\text{CN}$  solution

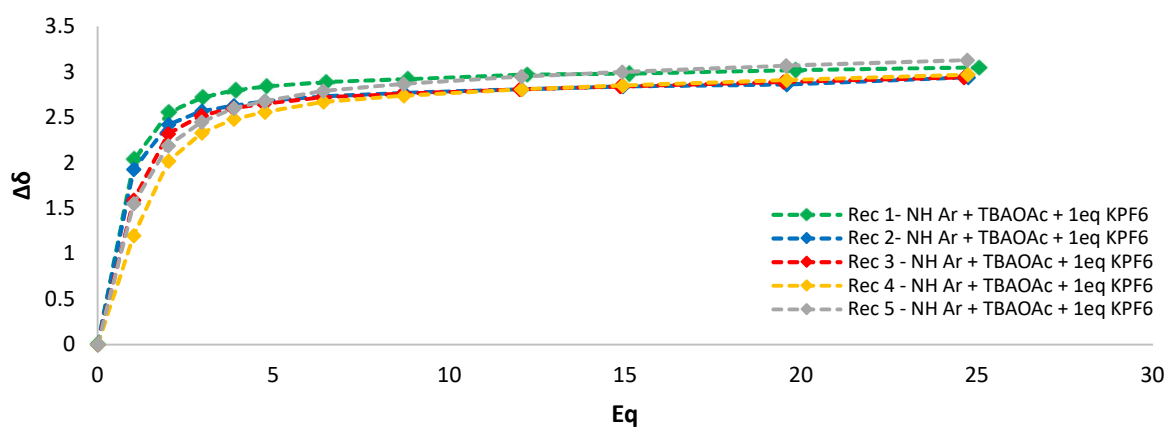

**Figure S74.**  $^1\text{H}$  NMR titration binding isotherm of receptors **1-5** with TBAOAc in the presence or absence of 1 eq. of cations, 3%  $\text{H}_2\text{O}/\text{CD}_3\text{CN}$  solution.

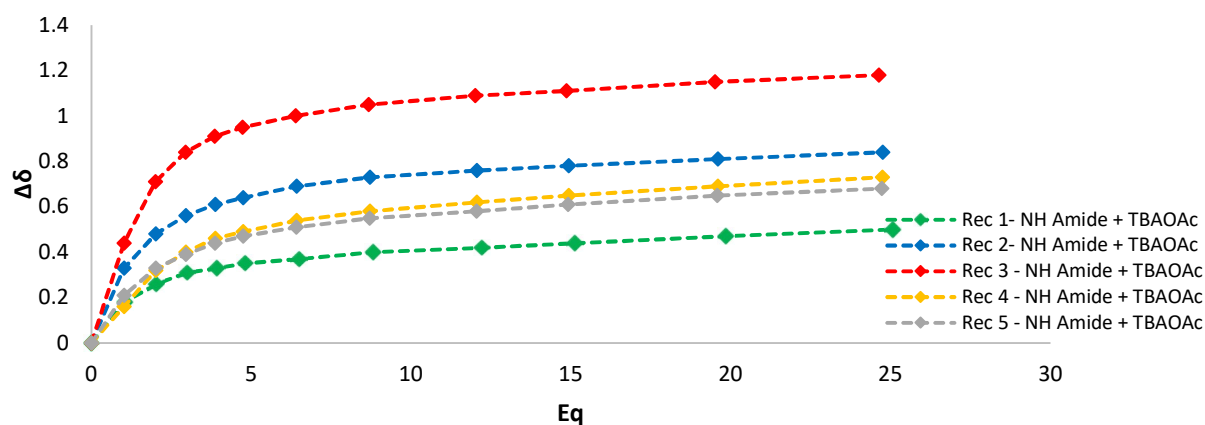

**Figure S75.**  $^1\text{H}$  NMR titration binding isotherm of receptors **1-5** with TBAOAc, 3%  $\text{H}_2\text{O}/\text{CD}_3\text{CN}$  solution

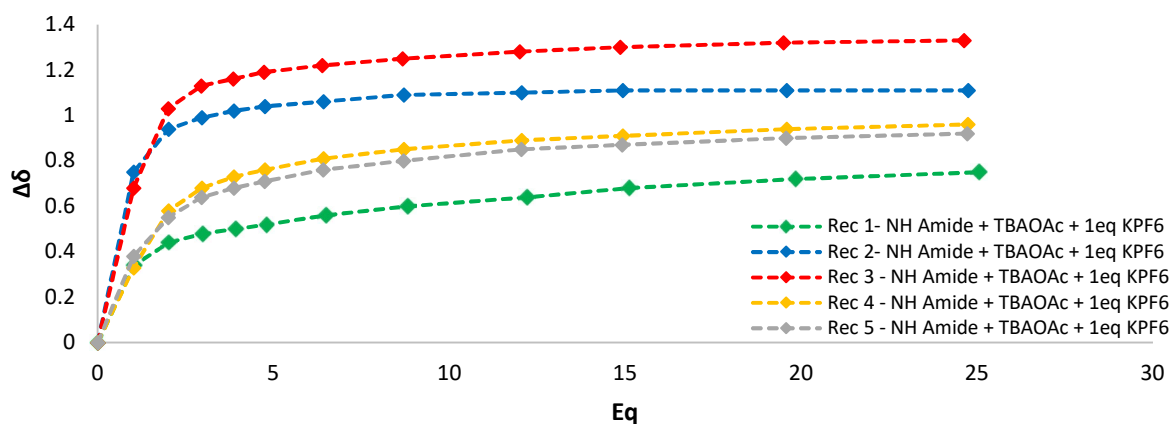

**Figure S76.**  $^1\text{H}$  NMR titration binding isotherm of receptors 1-5 with TBAOAc in the presence or absence of 1 eq. of cations, 3%  $\text{H}_2\text{O}/\text{CD}_3\text{CN}$  solution

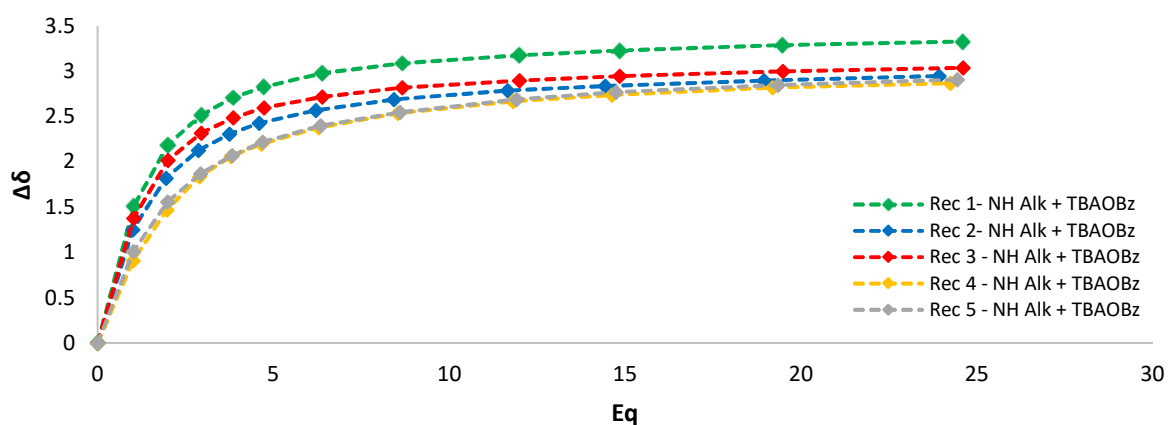

**Figure S77.**  $^1\text{H}$  NMR titration binding isotherm of receptors 1-5 with TBAOBz, 3%  $\text{H}_2\text{O}/\text{CD}_3\text{CN}$  solution

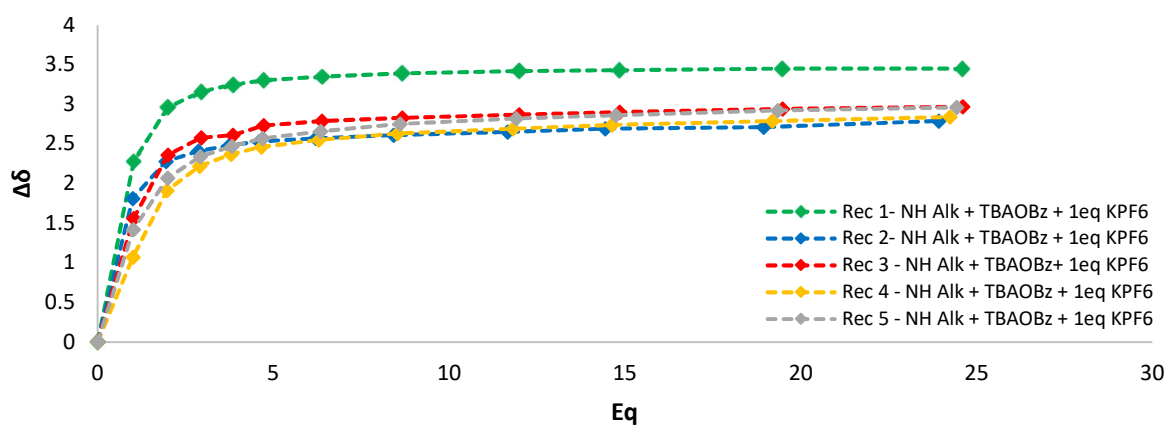

**Figure S78.**  $^1\text{H}$  NMR titration binding isotherm of receptors 1-5 with TBAOBz in the presence or absence of 1 eq. of cations, 3%  $\text{H}_2\text{O}/\text{CD}_3\text{CN}$  solution

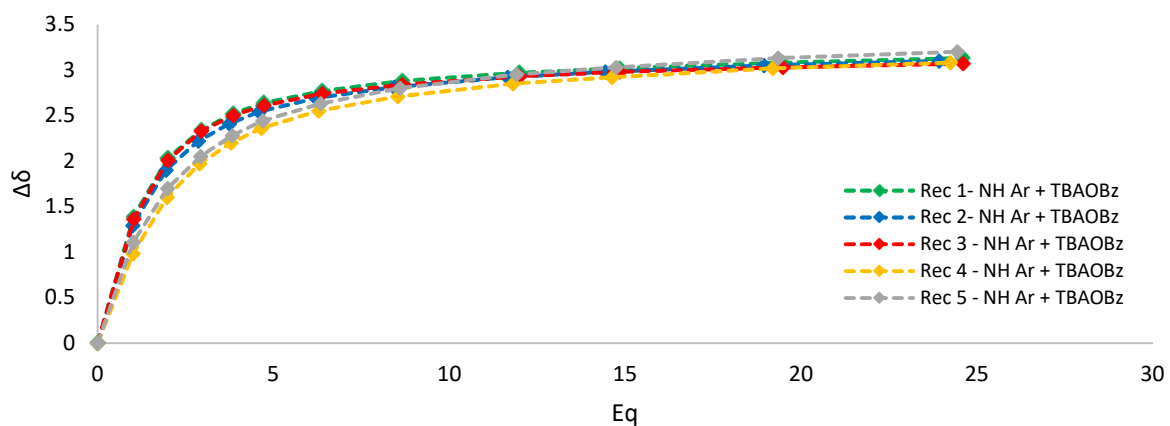

**Figure S79.**  $^1\text{H}$  NMR titration binding isotherm of receptors 1-5 with TBAOBz, 3%  $\text{H}_2\text{O}/\text{CD}_3\text{CN}$  solution

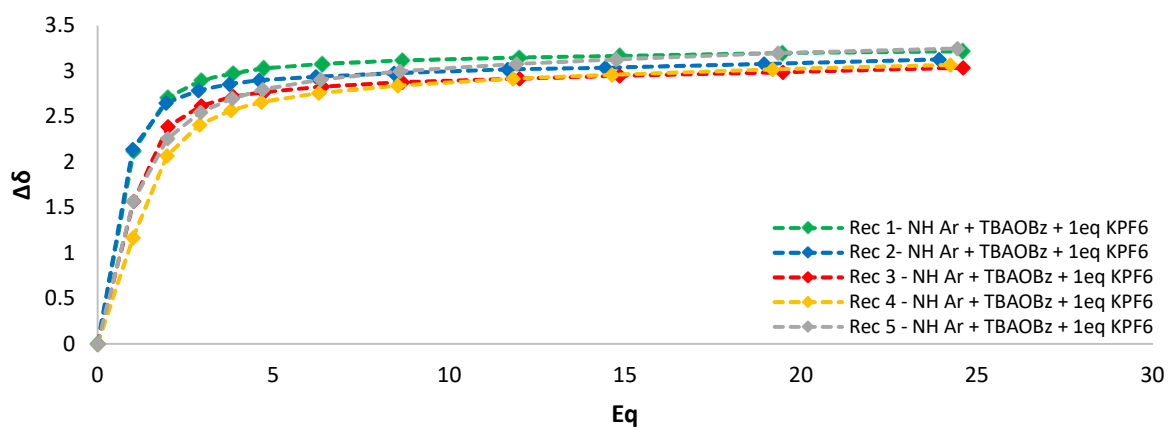

**Figure S80.**  $^1\text{H}$  NMR titration binding isotherm of receptors 1-5 with TBAOBz in the presence or absence of 1 eq. of cations, 3%  $\text{H}_2\text{O}/\text{CD}_3\text{CN}$  solution

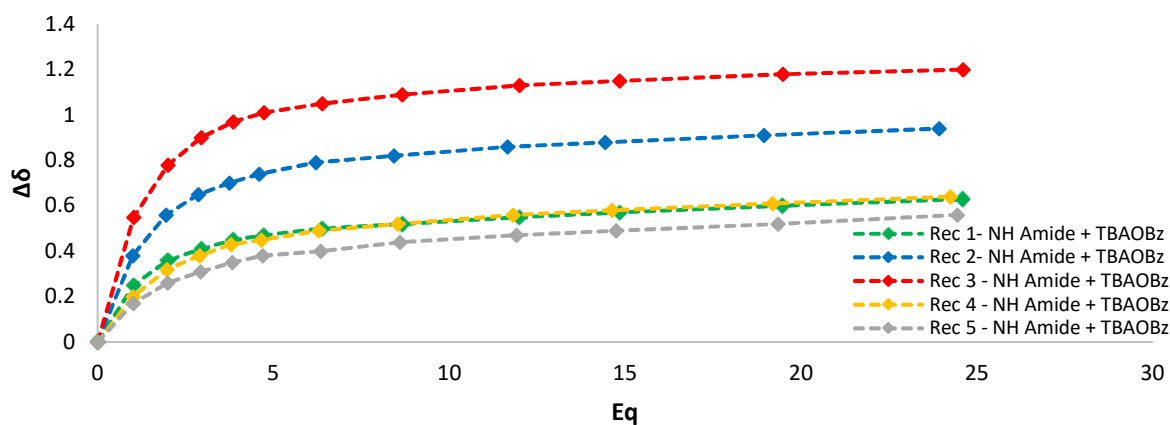

**Figure S81.**  $^1\text{H}$  NMR titration binding isotherm of receptors 1-5 with TBAOBz, 3%  $\text{H}_2\text{O}/\text{CD}_3\text{CN}$  solution

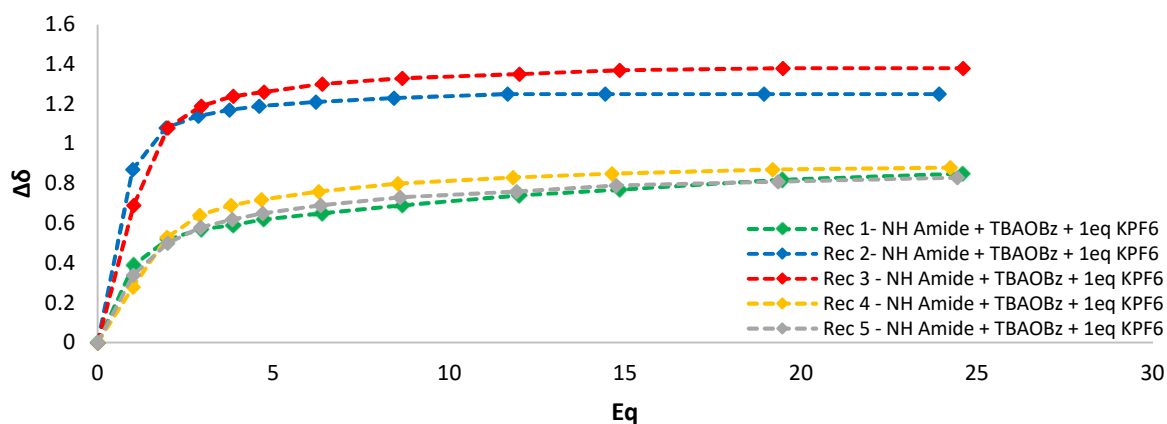

**Figure S82.**  $^1\text{H}$  NMR titration binding isotherm of receptors **1-5** with TBAOBz in the presence or absence of 1 eq. of cations, 3%  $\text{H}_2\text{O}/\text{CD}_3\text{CN}$  solution

| Receptor | TBAOAc                 | KOAc                     | $K_K/K_{\text{TBA}}$ | TBAOBz                 | KOBz                     | $K_K/K_{\text{TBA}}$ |
|----------|------------------------|--------------------------|----------------------|------------------------|--------------------------|----------------------|
| <b>1</b> | 320<br>( $\pm 2.6\%$ ) | 1330<br>( $\pm 11.2\%$ ) | 4.15                 | 320<br>( $\pm 2.3\%$ ) | 1200<br>( $\pm 11.0\%$ ) | 3.8                  |
| <b>2</b> | 240<br>( $\pm 2.3\%$ ) | 1200<br>( $\pm 9.1\%$ )  | 5.0                  | 270<br>( $\pm 2.2\%$ ) | 1600<br>( $\pm 9.8\%$ )  | 5.9                  |
| <b>3</b> | 290<br>( $\pm 2.7\%$ ) | 680<br>( $\pm 5.2\%$ )   | 2.3                  | 330<br>( $\pm 1.6\%$ ) | 630<br>( $\pm 5.7\%$ )   | 1.9                  |
| <b>4</b> | 150<br>( $\pm 3.8\%$ ) | 330<br>( $\pm 5.6\%$ )   | 2.2                  | 160<br>( $\pm 1.3\%$ ) | 320<br>( $\pm 6.7\%$ )   | 2                    |
| <b>5</b> | 180<br>( $\pm 1.9\%$ ) | 420<br>( $\pm 4.9\%$ )   | 2.3                  | 160<br>( $\pm 1.8\%$ ) | 400<br>( $\pm 3.7\%$ )   | 2.5                  |

**Figure S83.**  $^1\text{H}$  NMR spectroscopy  $K_{\text{obs}}$  values (298 K; 3%  $\text{H}_2\text{O}/\text{CD}_3\text{CN}$  solution) for interactions of the receptors **1-5** with anions in the presence or absence of potassium cation and errors values in parentheses

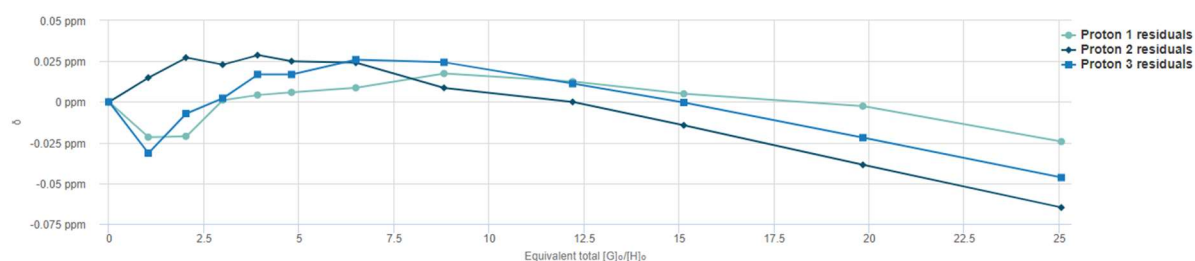

**Figure S84.** Residual plot for  $^1\text{H}$  NMR titration experiment for receptor **1** with TBAOAc, 3%  $\text{H}_2\text{O}/\text{CD}_3\text{CN}$  solution

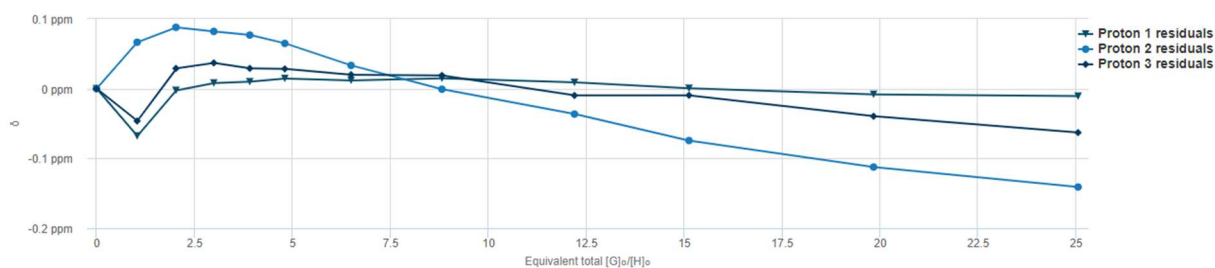

**Figure S85.** Residual plot for  $^1\text{H}$  NMR titration experiment for receptor **1** with TBAOAc in the presence of 1 eq. of potassium cations, 3%  $\text{H}_2\text{O}/\text{CD}_3\text{CN}$  solution

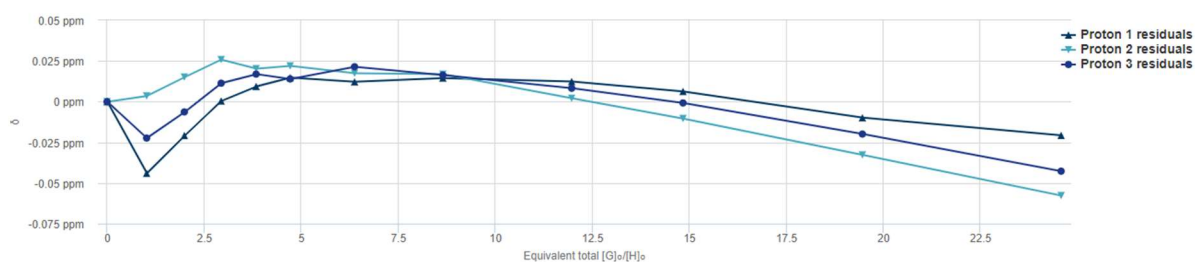

**Figure S86.** Residual plot for  $^1\text{H}$  NMR titration experiment for receptor **1** with TBAOBz, 3%  $\text{H}_2\text{O}/\text{CD}_3\text{CN}$  solution

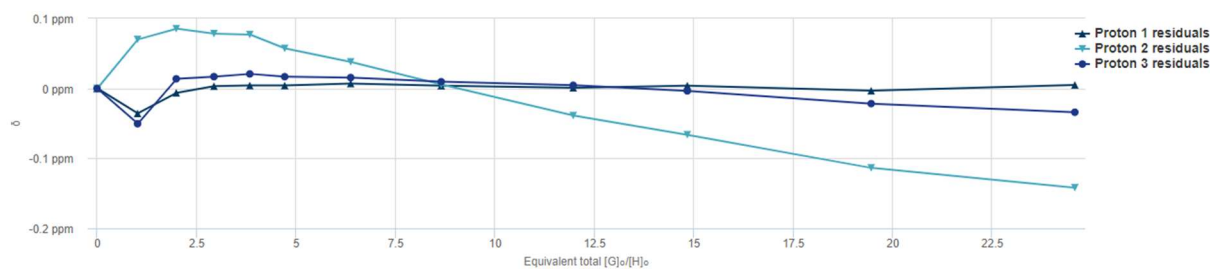

**Figure S87.** Residual plot for  $^1\text{H}$  NMR titration experiment for receptor **1** with TBAOBz in the presence of 1 eq. of potassium cations, 3%  $\text{H}_2\text{O}/\text{CD}_3\text{CN}$  solution

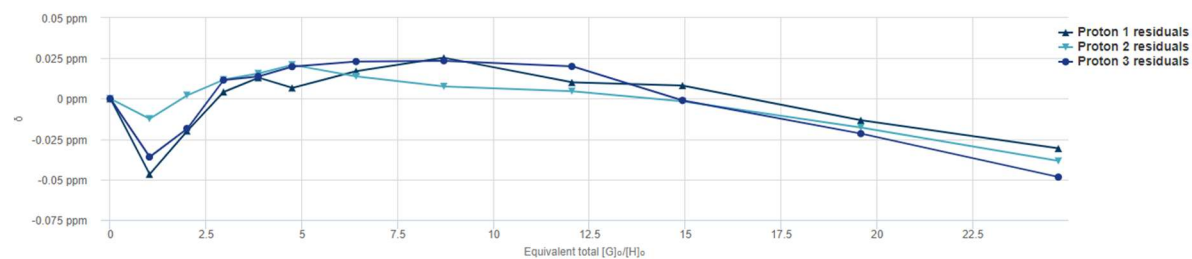

**Figure S88.** Residual plot for  $^1\text{H}$  NMR titration experiment for receptor **2** with TBAOAc, 3%  $\text{H}_2\text{O}/\text{CD}_3\text{CN}$  solution

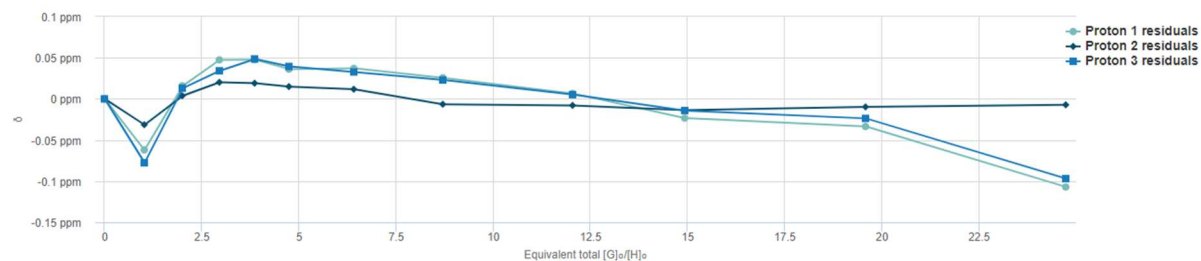

**Figure S89.** Residual plot for  $^1\text{H}$  NMR titration experiment for receptor **2** with TBAOAc in the presence of 1 eq. of potassium cations, 3%  $\text{H}_2\text{O}/\text{CD}_3\text{CN}$  solution

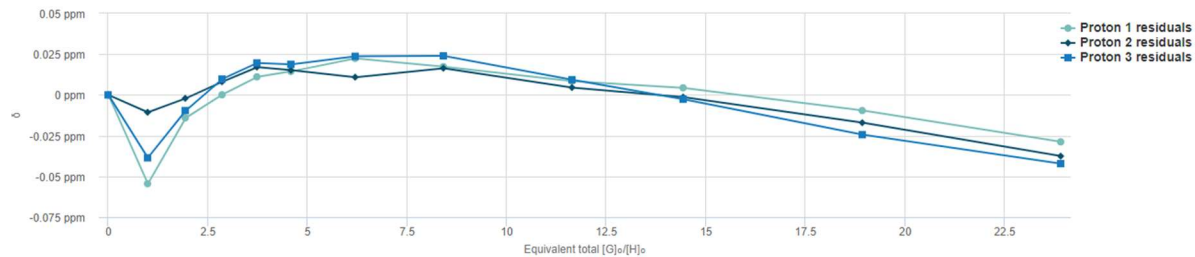

**Figure S90.** Residual plot for  $^1\text{H}$  NMR titration experiment for receptor **2** with TBAOBz, 3%  $\text{H}_2\text{O}/\text{CD}_3\text{CN}$  solution

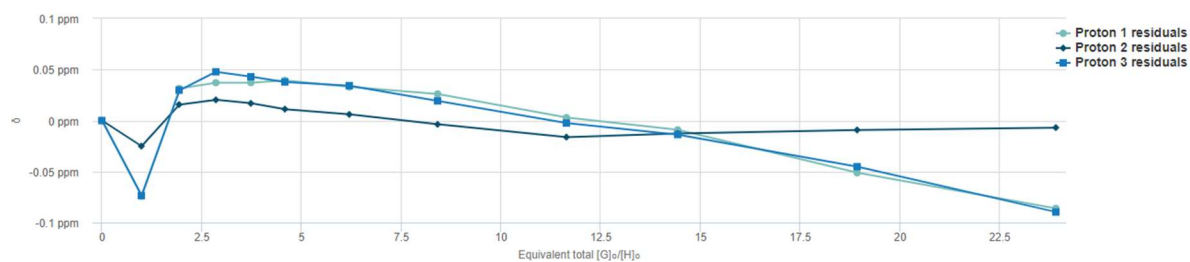

**Figure S91.** Residual plot for  $^1\text{H}$  NMR titration experiment for receptor **2** with TBAOBz in the presence of 1 eq. of potassium cations, 3%  $\text{H}_2\text{O}/\text{CD}_3\text{CN}$  solution

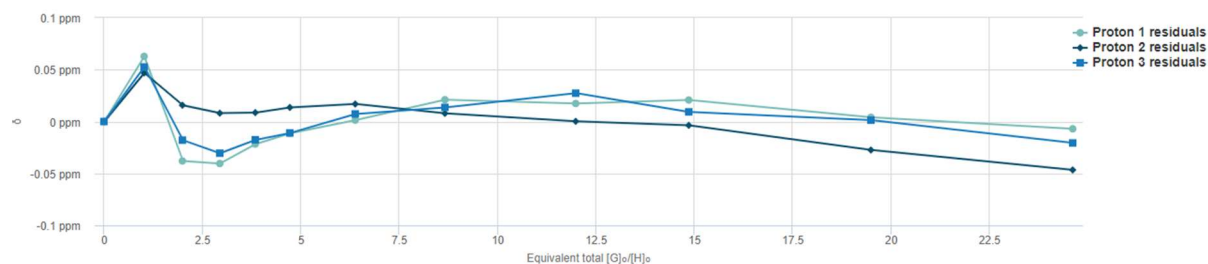

**Figure S92.** Residual plot for  $^1\text{H}$  NMR titration experiment for receptor **3** with TBAOAc, 3%  $\text{H}_2\text{O}/\text{CD}_3\text{CN}$  solution

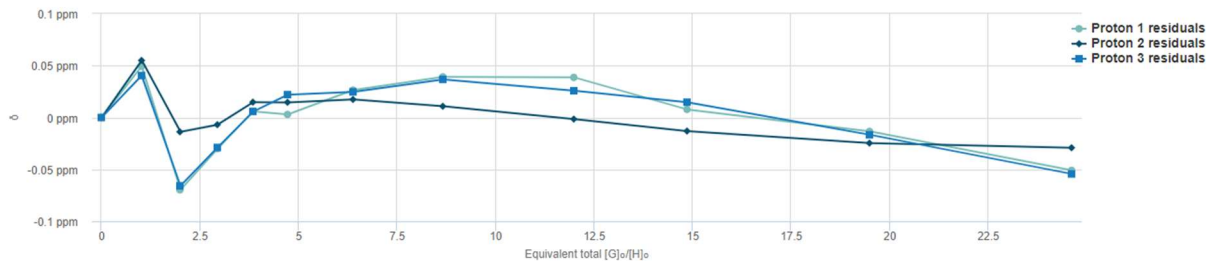

**Figure S93.** Residual plot for  $^1\text{H}$  NMR titration experiment for receptor **3** with TBAOAc in the presence of 1 eq. of potassium cations, 3%  $\text{H}_2\text{O}/\text{CD}_3\text{CN}$  solution

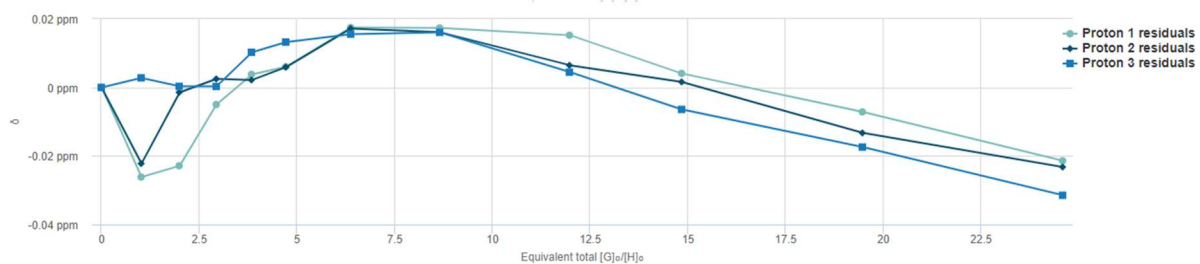

**Figure S94.** Residual plot for  $^1\text{H}$  NMR titration experiment for receptor **3** with TBAOBz, 3%  $\text{H}_2\text{O}/\text{CD}_3\text{CN}$  solution

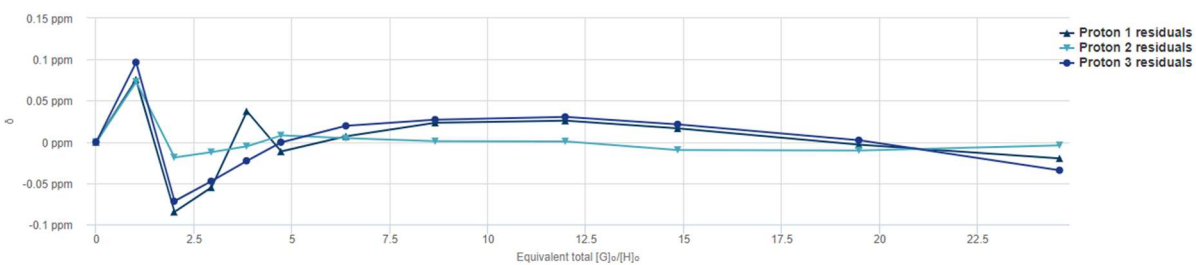

**Figure S95.** Residual plot for  $^1\text{H}$  NMR titration experiment for receptor **3** with TBAOBz in the presence of 1 eq. of potassium cations, 3%  $\text{H}_2\text{O}/\text{CD}_3\text{CN}$  solution



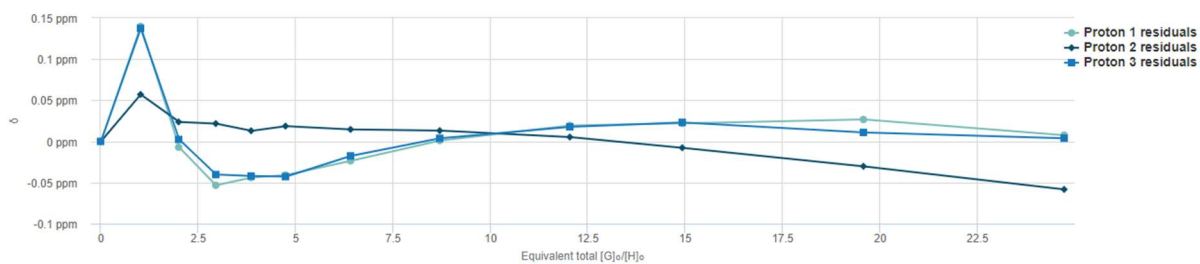

**Figure S96.** Residual plot for  $^1\text{H}$  NMR titration experiment for receptor **4** with TBAOAc, 3%  $\text{H}_2\text{O}/\text{CD}_3\text{CN}$  solution

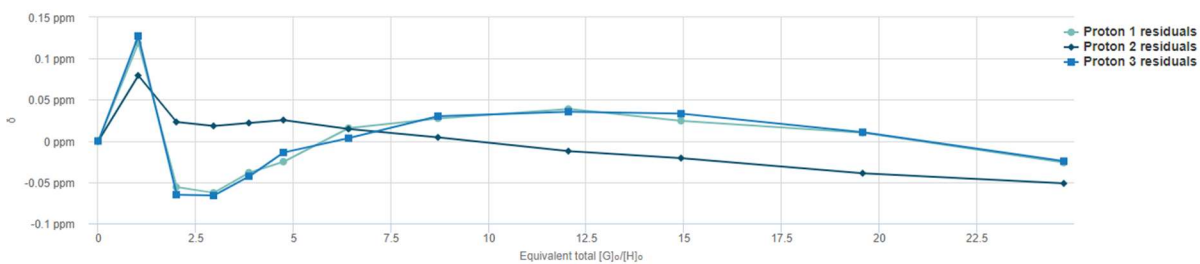

**Figure S97.** Residual plot for  $^1\text{H}$  NMR titration experiment for receptor **4** with TBAOAc in the presence of 1 eq. of potassium cations, 3%  $\text{H}_2\text{O}/\text{CD}_3\text{CN}$  solution

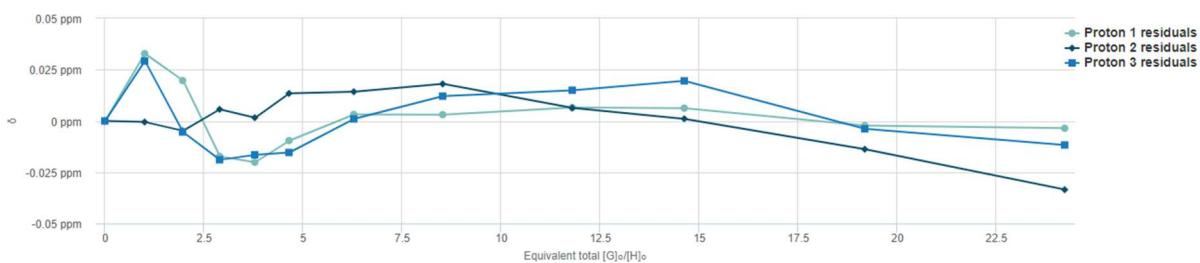

**Figure S98.** Residual plot for  $^1\text{H}$  NMR titration experiment for receptor **4** with TBAOBz, 3%  $\text{H}_2\text{O}/\text{CD}_3\text{CN}$  solution

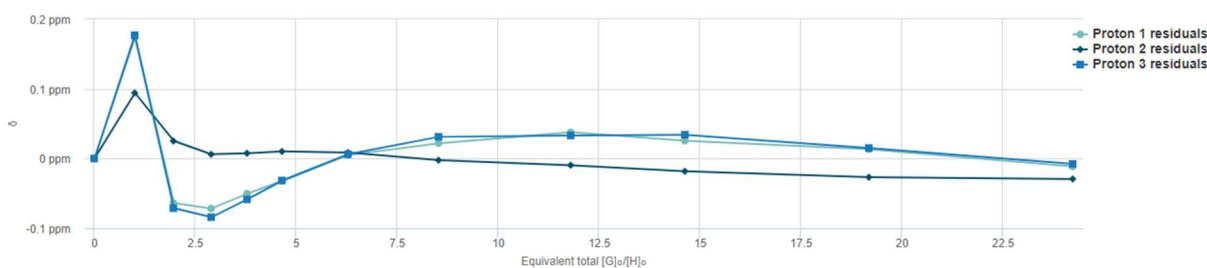

**Figure S99.** Residual plot for  $^1\text{H}$  NMR titration experiment for receptor **4** with TBAOBz in the presence of 1 eq. of potassium cations, 3%  $\text{H}_2\text{O}/\text{CD}_3\text{CN}$  solution

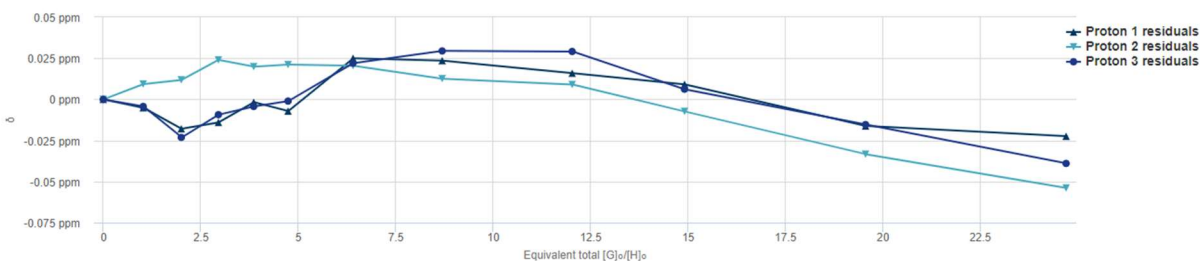

**Figure S100.** Residual plot for  $^1\text{H}$  NMR titration experiment for receptor **5** with TBAOAc, 3%  $\text{H}_2\text{O}/\text{CD}_3\text{CN}$  solution

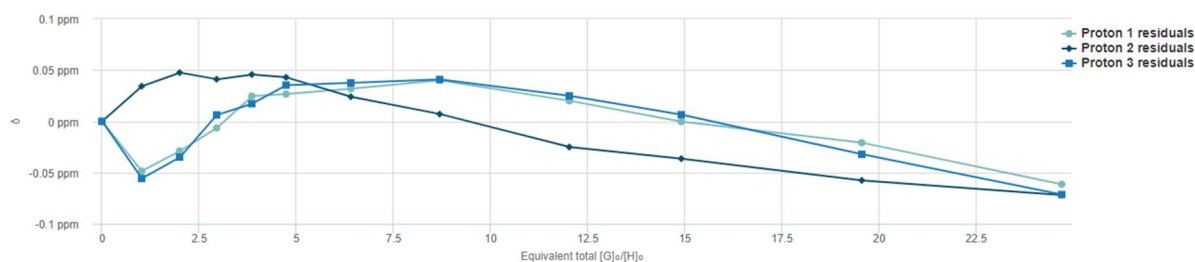

**Figure S101.** Residual plot for  $^1\text{H}$  NMR titration experiment for receptor **5** with TBAOAc in the presence of 1 eq. of potassium cations, 3%  $\text{H}_2\text{O}/\text{CD}_3\text{CN}$  solution

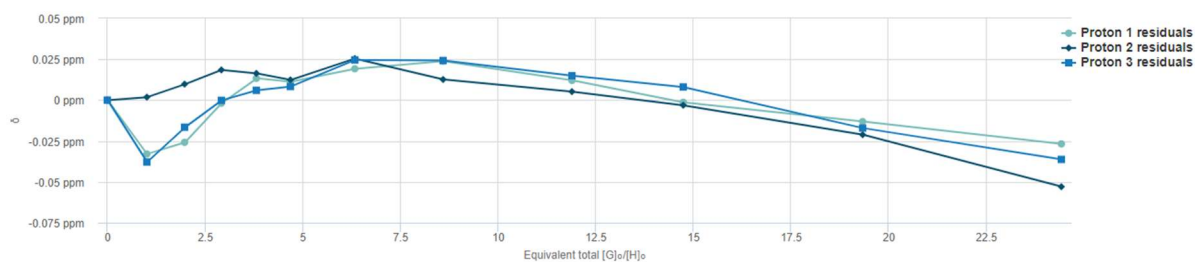

**Figure S102.** Residual plot for  $^1\text{H}$  NMR titration experiment for receptor **5** with TBAOBz, 3%  $\text{H}_2\text{O}/\text{CD}_3\text{CN}$  solution

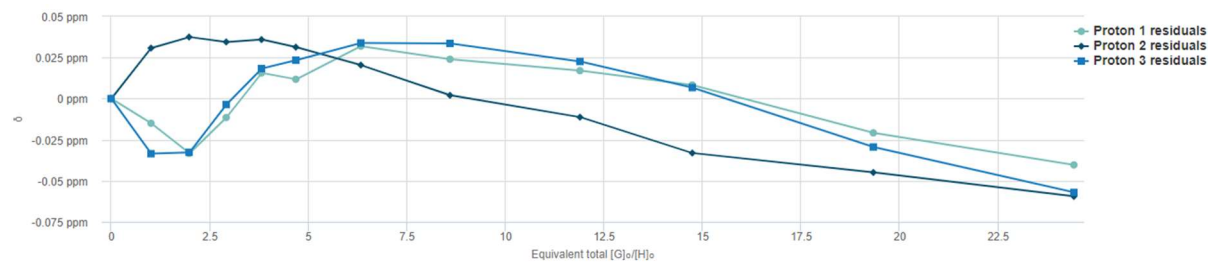

**Figure S103.** Residual plot for  $^1\text{H}$  NMR titration experiment for receptor **5** with TBAOBz in the presence of 1 eq. of potassium cations, 3%  $\text{H}_2\text{O}/\text{CD}_3\text{CN}$  solution

### 3. The $^1\text{H}$ NMR extraction experiments

The  $^1\text{H}$  NMR extraction experiments were performed on a 300 MHz Bruker Avance spectrometer, at 298 K, in  $\text{CDCl}_3$  solution. In each case 0.5 mL of  $1.25\text{--}2.5 \times 10^{-2}$  M solution of the receptor **1-5** was washed with water, then after phase separation, the receptor solution was extracted with aqueous solution of salts for 1 minute. The equivalent of salt in water solution was calculated based on molarity of the receptor in chloroform phase. *For example: 0.5 ml of chloroform solution of the receptor 1 ( $2.5 \times 10^{-2}$  M) was extracted with 0.5 ml of KOAc water solution (1.25 M) which corresponded to 50 eq.* Then chloroform phase containing receptor-salt complex was washed with water ('back' extraction), to prove the reversibility of extraction process. After each step of the experiment  $^1\text{H}$  NMR spectrum was registered. The efficiency of the extraction process was calculated on the basis of the carboxylate alkyl signals integration values, assuming the receptor as an internal standard. The 100% efficiency corresponds to fully salt loaded receptor.

- Control experiment checking salt affinity to aqueous phase. Confirmation that KOAc in LLE experiment condition was not extracted with chloroform.

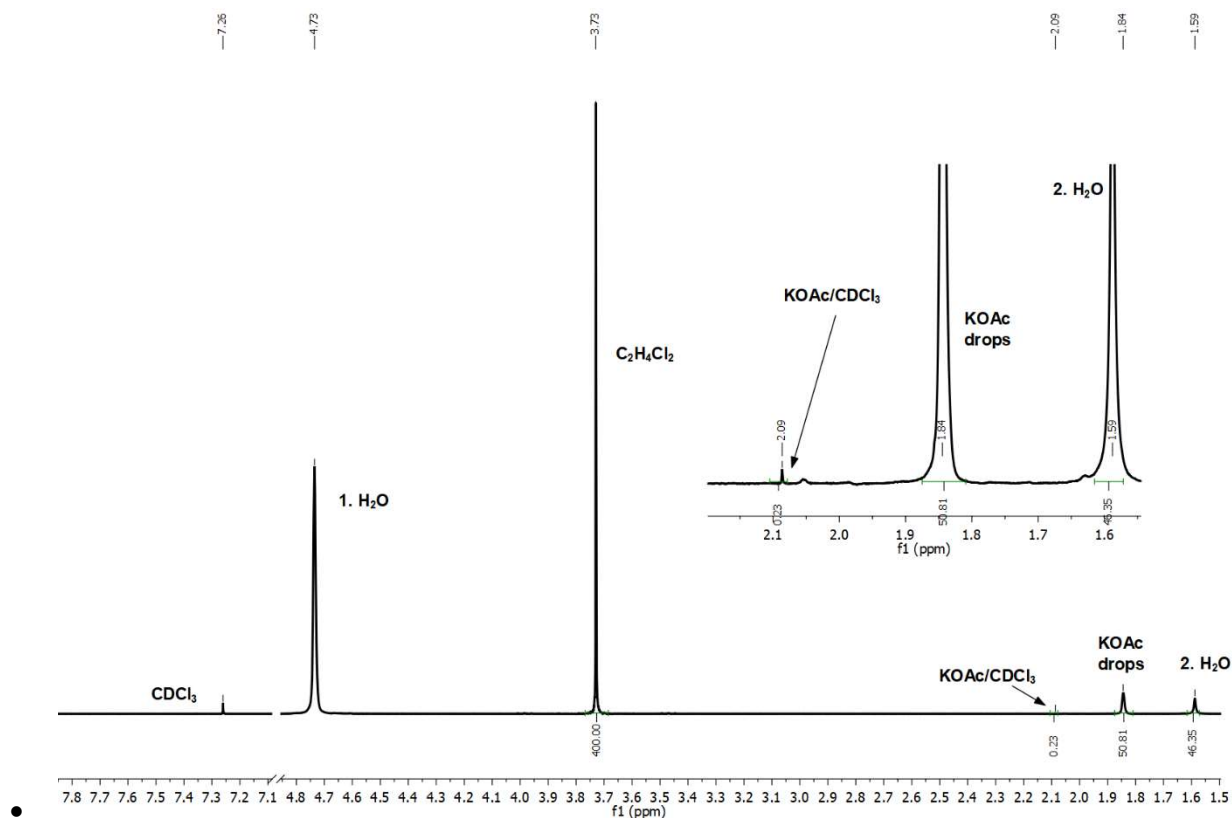

**Figure S104.** Liquid-Liquid extraction of KOAc aqua solution  $C=3.2$  M which corresponds to 130 eq. when the receptor solution is present with  $\text{CDCl}_3$ . 1  $\text{H}_2\text{O}$  is peak corresponding to water in drops on the NMR tubes walls. 2  $\text{H}_2\text{O}$  is water in  $\text{CDCl}_3$ . Potassium acetate concentration was measured based on addition of 10  $\mu\text{L}$  of 1,2-dichloroethane as internal standard and it was  $1.93 \times 10^{-7}$ . The efficiency of this proces was  $6 \times 10^{-6}\%$  based on internal standard.

- On the spectrum above and spectras under the peak 1.84-1.88 can be observed. This peak corresponds to the potassium acetate in water droplets remaining on the walls of NMR tube. The intensity of this signal depended on the concentration of the potassium acetate in water and the quality of phase separation. Nevertheless, the presence of this signal does not affect extraction experiment efficiency and quality, because the peak of potassium acetate in  $\text{CDCl}_3$  has diferent chemical shift 2.09-2.13 ppm. Moreover, we tried to simulate the most realistic conditions of the extraction proces therefore we did not perform any additional treatments of the NMR sample.

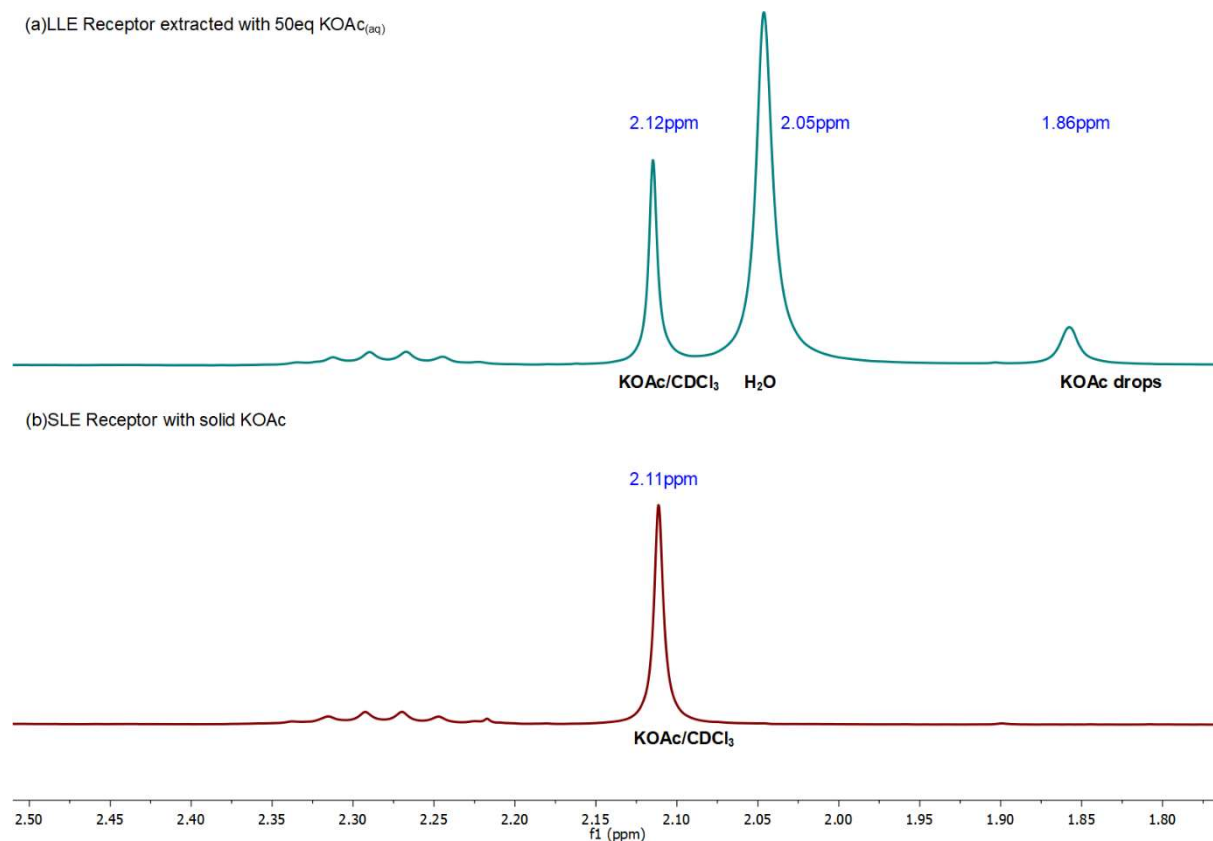

**Figure S105.** Partial <sup>1</sup>H NMR spectrum of the receptor **1** (a) LLE extraction  $C_{\text{receptor}}=2.5 \times 10^{-2} \text{ M}$ ,  $C_{\text{KOAc}}=1.25 \text{ M}$  (b) SLE extraction  $C_{\text{receptor}}=2.5 \times 10^{-2} \text{ M}$ , solid KOAc was added.

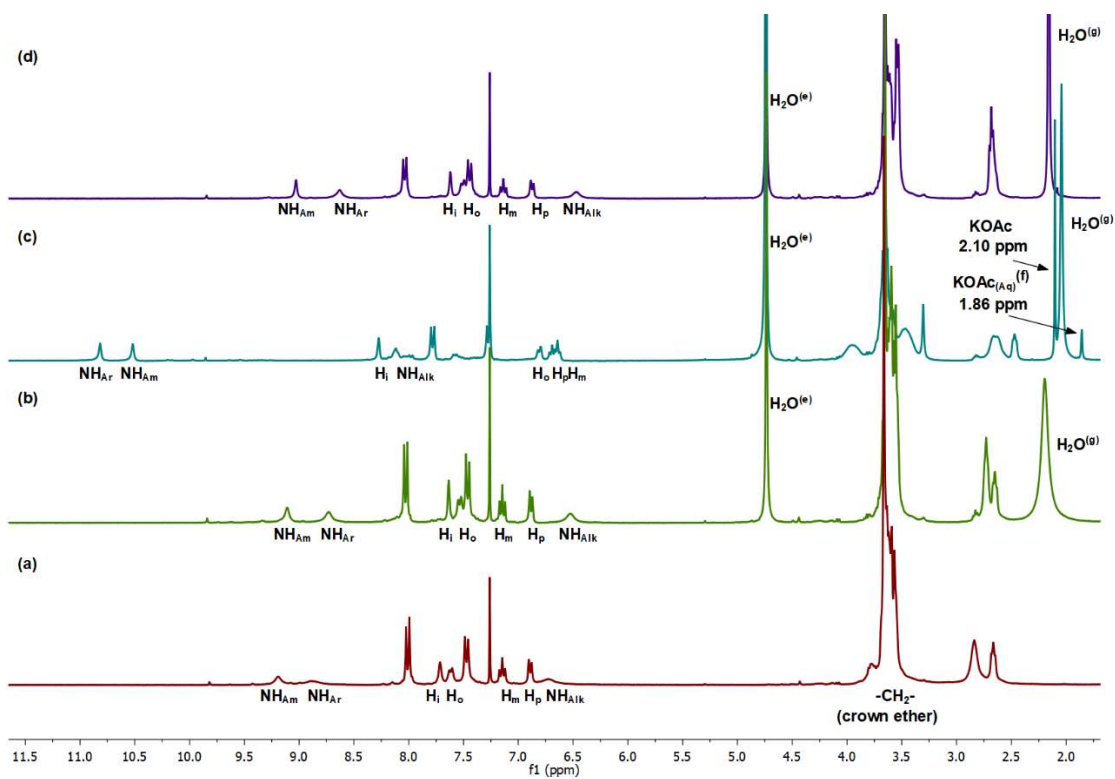

**Figure S106.** <sup>1</sup>H NMR spectra stack of extraction experiments: (a) receptor **2** dissolved in 'dry' CDCl<sub>3</sub> ( $C_{\text{receptor}}=2.5 \times 10^{-2} \text{ M}$ ); (b) receptor **2** solution after being washed with deionized water; (c) receptor **2** solution after extraction with 50 eq. KOAc aqueous solution (1.25 M); (d) receptor **2** solution after back-extraction to deionized water; H<sub>2</sub>O<sup>(e)</sup>- water signal from droplets on NMR tubes walls; H<sub>2</sub>O<sup>(f)</sup>-water signal in CDCl<sub>3</sub>; KOAc<sub>(aq)</sub><sup>(f)</sup> salt present in droplets of water on the NMR tubes walls

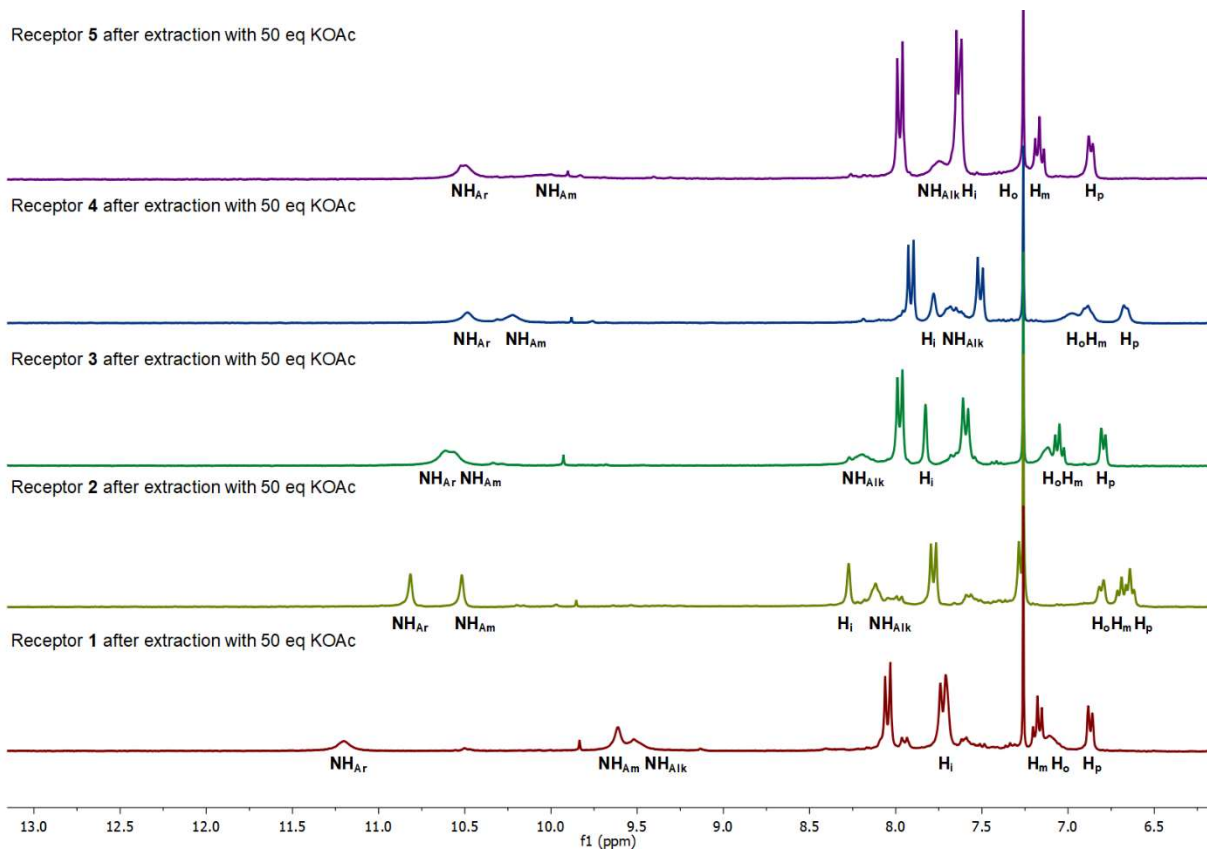

**Figure S107.** Partial  $^1H$  NMR extraction experiment of receptors 1-5 after 1 minute extraction with 50 eq. aqueous solution of potassium acetate (293 K,  $CDCl_3$ ,  $C_{KOAc}=1.25$  M,  $C_{receptor}=2.5 \times 10^{-2}$  M)

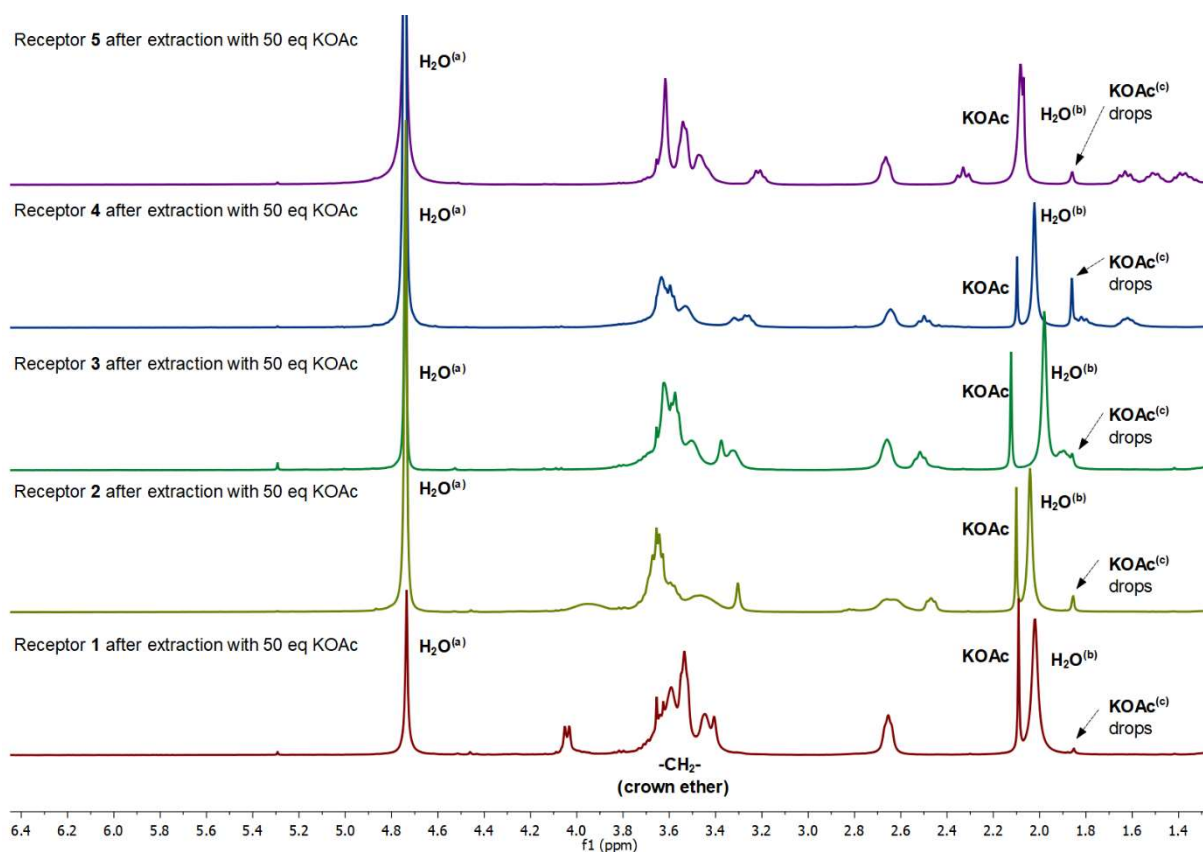

**Figure S108.** Partial  $^1\text{H}$  NMR extraction experiment of receptors 1-5 after 1 minute extraction with 50 eq. aqueous solution of potassium acetate (293 K,  $\text{CDCl}_3$ ,  $C_{\text{KOAc}}=1.25\text{ M}$ ,  $C_{\text{receptor}}=2.5 \times 10^{-2}\text{ M}$ );  $\text{H}_2\text{O}^{(a)}$  - water signal from droplets on NMR tubes walls;  $\text{H}_2\text{O}^{(b)}$ -water signal in  $\text{CDCl}_3$ ;  $\text{KOAc}_{(\text{aq})}^{(c)}$  salt present in droplets of water on the NMR tubes walls

| Receptor | Extraction efficiency for 50 Eq. KOAc <sup>(a)</sup> | Extraction efficiency for 25 Eq. KOAc <sup>(a)</sup> |
|----------|------------------------------------------------------|------------------------------------------------------|
| 1        | 76%                                                  | 58%                                                  |
| 2        | 85%                                                  | 73%                                                  |
| 3        | 71%                                                  | 63%                                                  |
| 4        | 67%                                                  | 34%                                                  |
| 5        | 33%                                                  | 27%                                                  |

**Figure S109.** Efficiency of extraction process in function of salt concentration. Based on  $^1\text{H}$  NMR extraction experiments. (293 K,  $\text{CDCl}_3$ ;  $C_{\text{receptor}}= 2.5 \times 10^{-2}\text{ M}$ ;  $C_{\text{KOAc}}=1.25\text{ M}$  (50eq.) or  $C_{\text{KOAc}}=0.625\text{ M}$  (25eq.)); <sup>(a)</sup>units of moles of salt vs. units of moles of the receptor in 0.5 ml of solutions; Extraction efficiency calculated from the integral value of acetate methyl group. Assuming that 100% efficiency is the value of the integral 3.

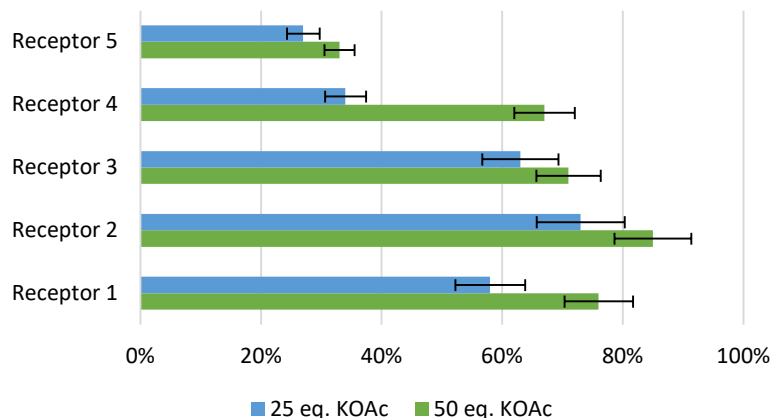

**Figure S110.** Efficiency of extraction process in function of salt concentration with errors. Based on  $^1\text{H}$  NMR extraction experiments (293 K,  $\text{CDCl}_3$ ;  $C_{\text{receptor}} = 2.5 \times 10^{-2}$  M;  $C_{\text{KOAc}} = 1.25$  M (50eq.) or  $C_{\text{KOAc}} = 0.625$  M (25eq.))

#### 4. The 2D NMR ROESY experiment

2D NMR ROESY experiment was performed on 500 MHz Avance spectrometer, at 298 K in  $\text{CDCl}_3$  solution. The receptor **2** or **4** solution  $C_{\text{receptor}} = 3.2 \times 10^{-2}$  M in chloroform was extracted with KOAc aqueous solution  $C_{\text{KOAc}} = 3$  M (complex spectres) or with deionized water (ligand spectres). Then after phase separation organic phase was retracted through hydrophobic filter and placed in NMR tube. Filtration was performed to dispose water drops on the NMR tube's walls.

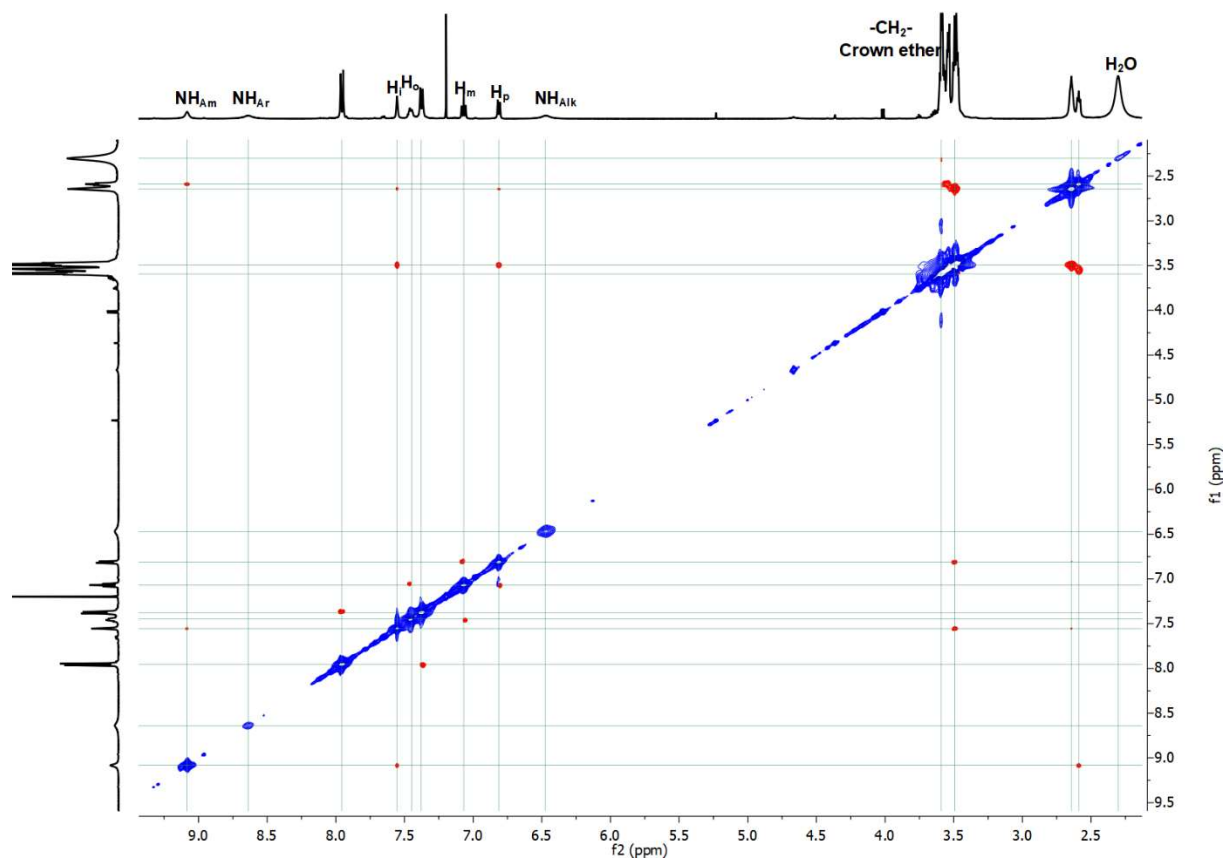

**Figure S111.** 2D ROESY spectrum of receptor 2 'free' ligand CDCl<sub>3</sub> after extraction with deionized water (500 MHz; CDCl<sub>3</sub>; 293 K)

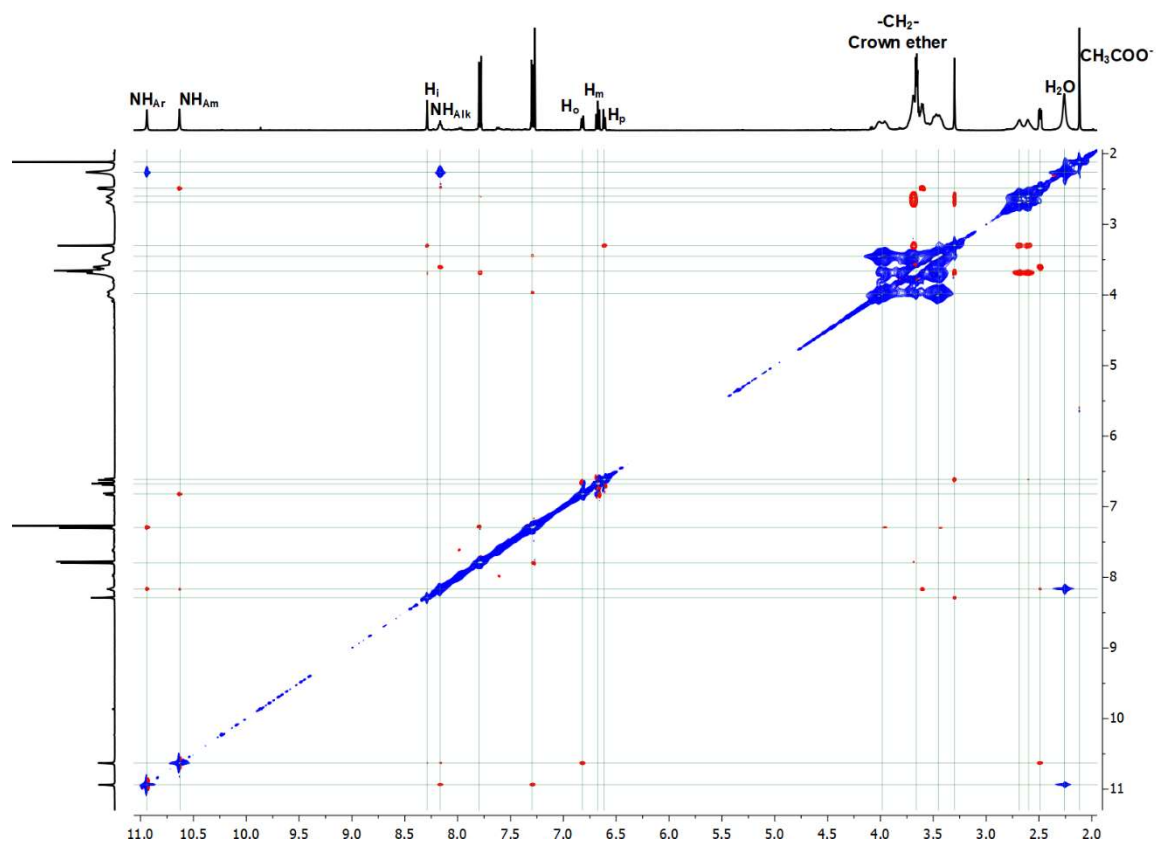

**Figure S112.** 2D ROESY spectrum of receptor 2•KOAc complex (500 MHz; CDCl<sub>3</sub>; 293 K)



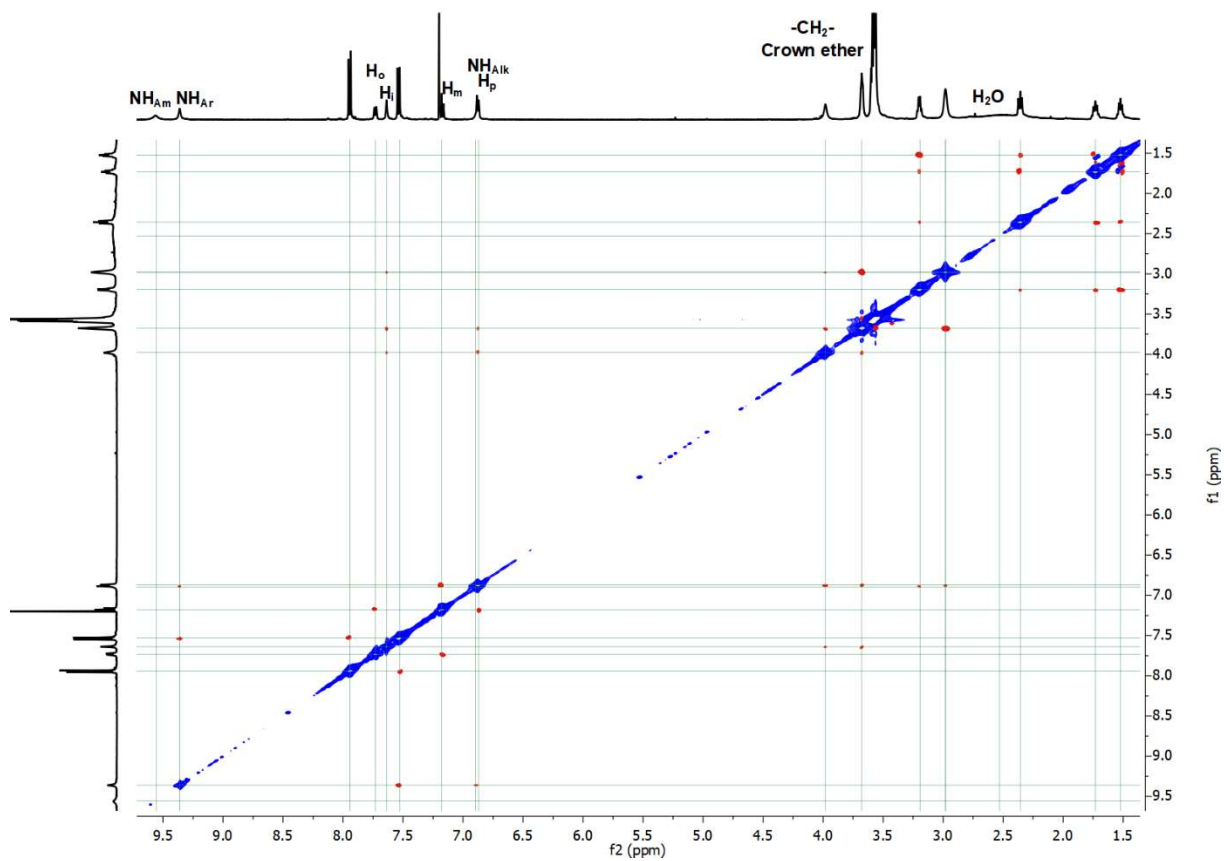

**Figure S113.** 2D ROESY spectrum of receptor **4** 'free' ligand CDCl<sub>3</sub> after extraction with deionized water (500 MHz; CDCl<sub>3</sub>; 293 K)

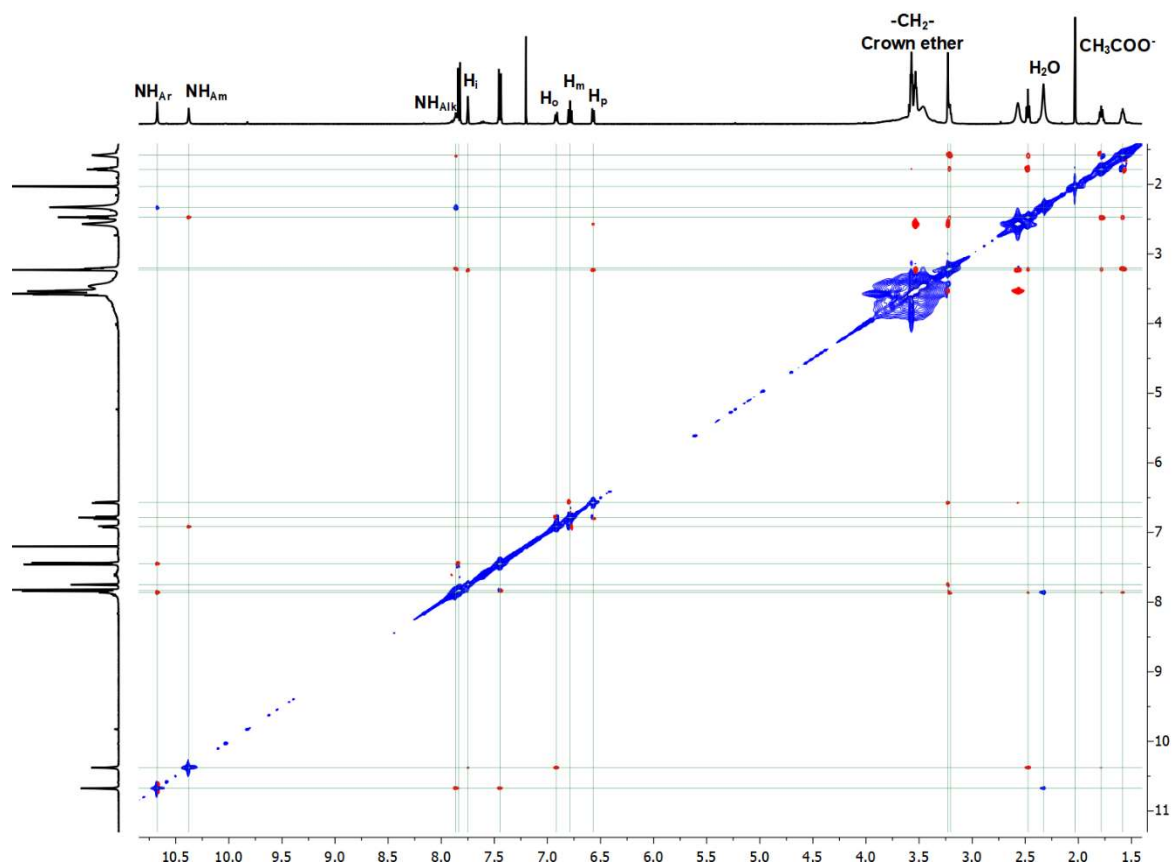

Figure S114. 2D ROESY spectrum of receptor **4**•KOAc complex, (500 MHz; CDCl<sub>3</sub>; 293 K)

## 5. DFT calculation

Theoretical calculations for **2**•KOAc and **4**•KOAc were performed with ORCA Version 4.2.1<sup>3</sup> The initial (starting point) geometry has been established based on 2D ROESY NMR results and was obtained by preoptimization of complexes with universal force field and steepest descent algorithm implemented in Avogadro 1.2.<sup>4</sup> Geometry optimization were done with aim of the B3LYP and dev2-SVP basis set.<sup>5,6</sup> Evaluated energies for obtained final geometries were  $-8230663.3521759 \text{ kJ} \times \text{mol}^{-1}$  for **2**•KOAc complex and  $-8436798.23543657 \text{ kJ} \times \text{mol}^{-1}$  for **4**•KOAc.

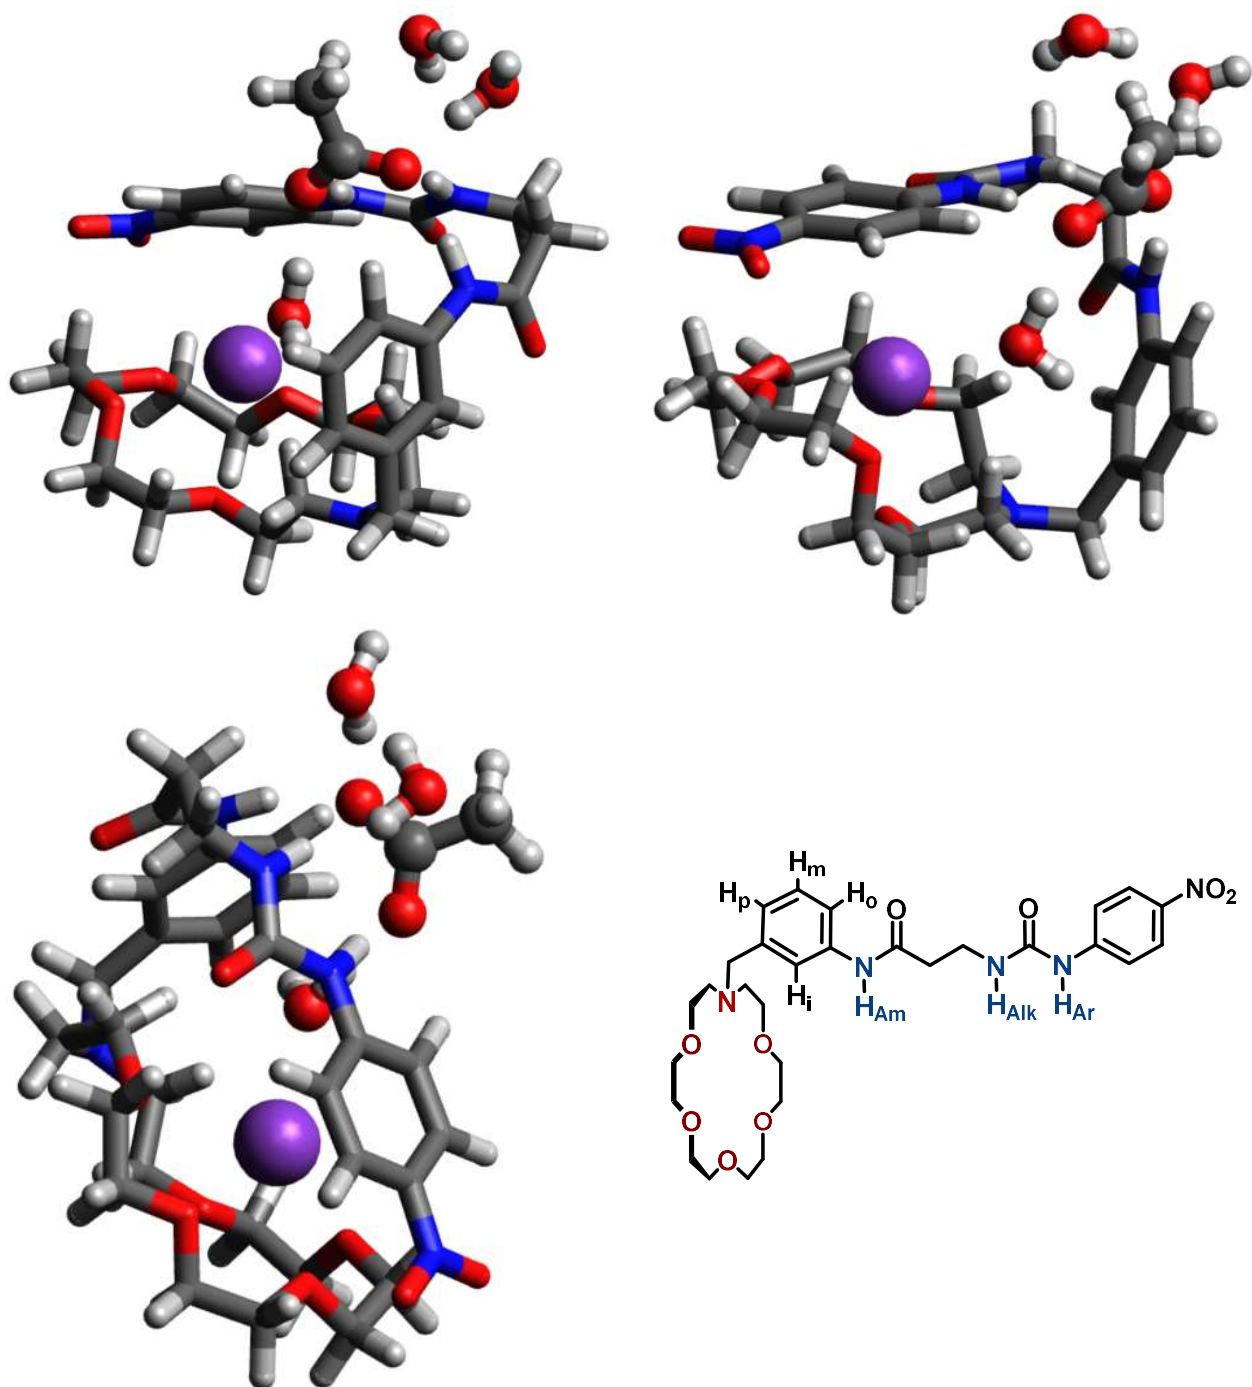

**Figure S115.** The structures of receptor **2** in complex with KOAc.

| Atoms                                                                      | Distance [Å]                     |
|----------------------------------------------------------------------------|----------------------------------|
| O(CH <sub>3</sub> COO <sup>-</sup> )Y-shape---N(NH <sub>Alk</sub> )        | 3.097; ∠ <sub>NHO</sub> 168°     |
| O(CH <sub>3</sub> COO <sup>-</sup> )Y-shape---N(NH <sub>Alk</sub> )        | 3.582; ∠ <sub>NHO</sub> 132°     |
| O(CH <sub>3</sub> COO <sup>-</sup> )Y-shape---N(NH <sub>Ar</sub> )         | 2.806; ∠ <sub>NHO</sub> 171°     |
| O(CH <sub>3</sub> COO <sup>-</sup> )Y-shape---N(NH <sub>Ar</sub> )         | 3.829; ∠ <sub>NHO</sub> 140°     |
| O(CH <sub>3</sub> COO <sup>-</sup> )Y-shape---N(NH <sub>Am</sub> )         | 2.873; ∠ <sub>NHO</sub> 164°     |
| O(CH <sub>3</sub> COO <sup>-</sup> )Y-shape---N(NH <sub>Am</sub> )         | 4.059; ∠ <sub>NHO</sub> 126°     |
| O(CH <sub>3</sub> COO <sup>-</sup> )Y-shape---H(Bridging H <sub>2</sub> O) | 1.784; ∠ <sub>ACO-H-O</sub> 173° |
| O(CH <sub>3</sub> COO <sup>-</sup> )Y-shape---H(Bridging H <sub>2</sub> O) | 4.252; ∠ <sub>ACO-H-O</sub> 80°  |
| K <sup>+</sup> --- O(Bridging H <sub>2</sub> O)                            | 2.731                            |
| O(CH <sub>3</sub> COO <sup>-</sup> )Y-shape---K <sup>+</sup>               | 4.894                            |

|                                                                           |       |
|---------------------------------------------------------------------------|-------|
| O(CH <sub>3</sub> COO <sup>-</sup> )Y-shape---K <sup>+</sup>              | 6.561 |
| Crown ether-Ar <sub>ring</sub> π---K <sup>+</sup>                         | 5.584 |
| NO <sub>2</sub> -Ar <sub>ring</sub> π---K <sup>+</sup>                    | 3.521 |
| H <sub>o</sub> ---H(CH <sub>3</sub> COO <sup>-</sup> )                    | 4.029 |
| H <sub>o</sub> ---H(CH <sub>3</sub> COO <sup>-</sup> )                    | 4.590 |
| H <sub>o</sub> ---H(CH <sub>3</sub> COO <sup>-</sup> )                    | 5.004 |
| Crown ether -CH <sub>2</sub> - --- H(NO <sub>2</sub> Ar <sub>ring</sub> ) | 2.801 |
| Crown ether -CH <sub>2</sub> - --- H(NO <sub>2</sub> Ar <sub>ring</sub> ) | 2.841 |
| Crown ether -CH <sub>2</sub> - --- H(NO <sub>2</sub> Ar <sub>ring</sub> ) | 2.891 |
| Crown ether -CH <sub>2</sub> - --- H(NO <sub>2</sub> Ar <sub>ring</sub> ) | 3.120 |

Figure S116. Distances between atoms for 2•KOAc complex

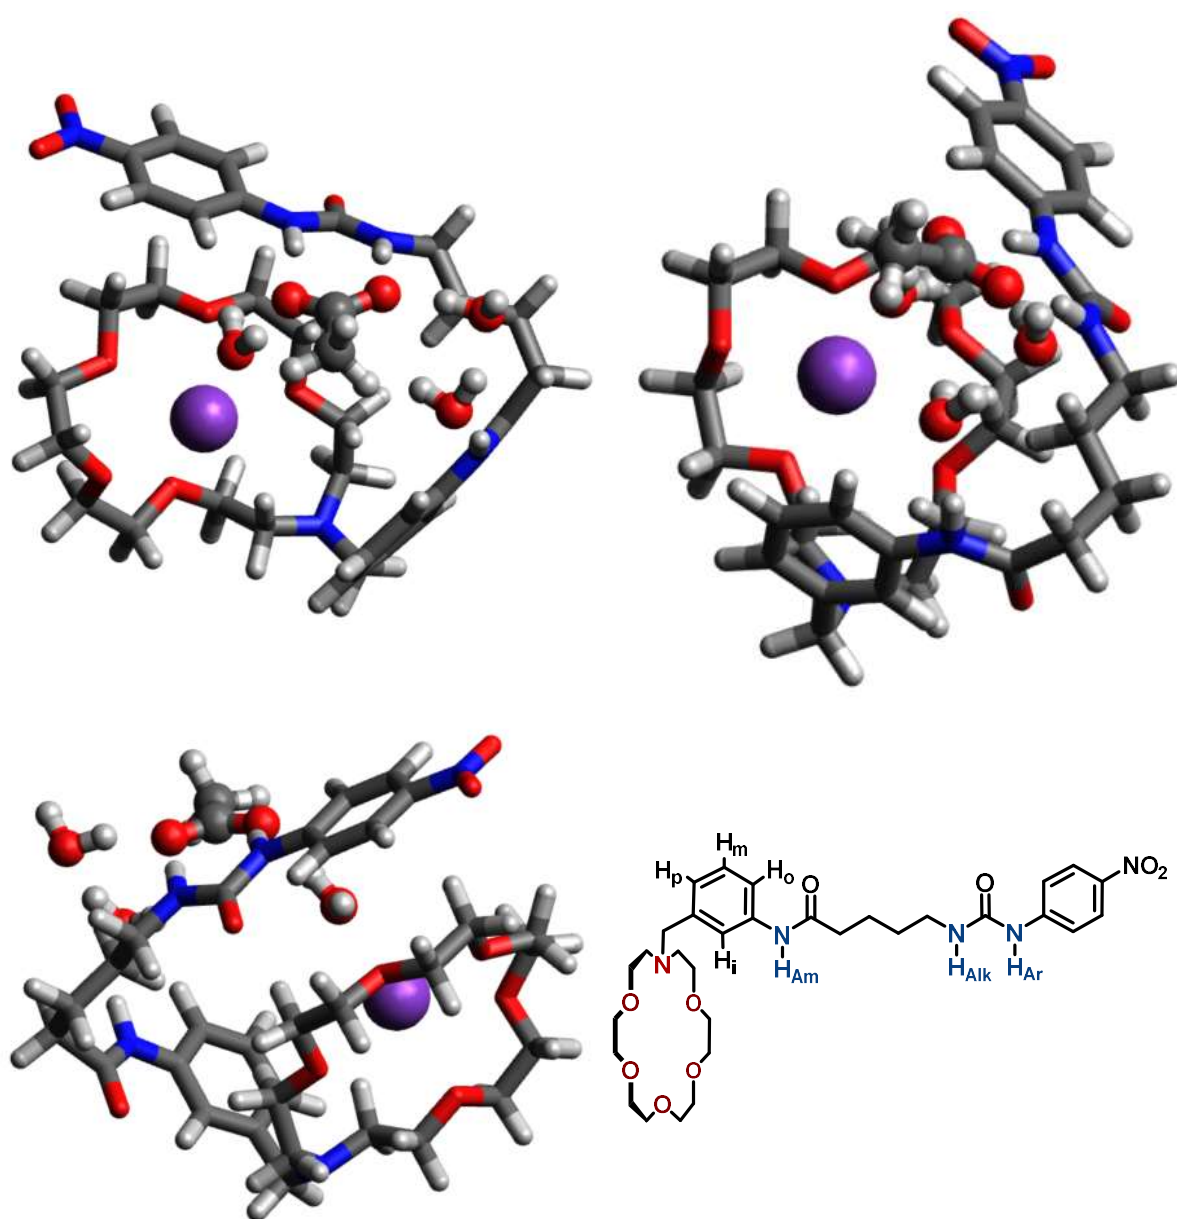

Figure S117. The structures of receptor 4 in complex with KOAc.

| Atoms                                                                      | Distance [Å]                     |
|----------------------------------------------------------------------------|----------------------------------|
| O(CH <sub>3</sub> COO <sup>-</sup> )Y-shape---N(NH <sub>Alk</sub> )        | 2.882; ∠ <sub>NHO</sub> 168°     |
| O(CH <sub>3</sub> COO <sup>-</sup> )Y-shape---N(NH <sub>Alk</sub> )        | 3.572; ∠ <sub>NHO</sub> 128°     |
| O(CH <sub>3</sub> COO <sup>-</sup> )Y-shape---N(NH <sub>Ar</sub> )         | 2.825; ∠ <sub>NHO</sub> 167°     |
| O(CH <sub>3</sub> COO <sup>-</sup> )Y-shape---N(NH <sub>Ar</sub> )         | 3.629; ∠ <sub>NHO</sub> 137°     |
| O(CH <sub>3</sub> COO <sup>-</sup> )Y-shape---N(NH <sub>Am</sub> )         | 5.332; ∠ <sub>NHO</sub> 127°     |
| O(CH <sub>3</sub> COO <sup>-</sup> )Y-shape---N(NH <sub>Am</sub> )         | 6.425; ∠ <sub>NHO</sub> 114°     |
| O(CH <sub>3</sub> COO <sup>-</sup> )Y-shape---H(Bridging H <sub>2</sub> O) | 1.745; ∠ <sub>AcO-H-O</sub> 166° |
| O(CH <sub>3</sub> COO <sup>-</sup> )Y-shape---H(Bridging H <sub>2</sub> O) | 3.546; ∠ <sub>AcO-H-O</sub> 145° |
| K <sup>+</sup> --- O(Bridging H <sub>2</sub> O)                            | 2.590                            |
| O(CH <sub>3</sub> COO <sup>-</sup> )Y-shape---K <sup>+</sup>               | 5.263                            |
| O(CH <sub>3</sub> COO <sup>-</sup> )Y-shape---K <sup>+</sup>               | 6.649                            |
| Crown ether-Ar <sub>ring</sub> π—K <sup>+</sup>                            | 5.324                            |
| NO <sub>2</sub> -Ar <sub>ring</sub> π—K <sup>+</sup>                       | 5.584                            |
| H <sub>o</sub> ---H(CH <sub>3</sub> COO <sup>-</sup> )                     | 3.961                            |
| H <sub>o</sub> ---H(CH <sub>3</sub> COO <sup>-</sup> )                     | 5.154                            |
| H <sub>o</sub> ---H(CH <sub>3</sub> COO <sup>-</sup> )                     | 5.731                            |
| Crown ether -CH <sub>2</sub> - --- H(NO <sub>2</sub> Ar <sub>ring</sub> )  | 3.296                            |
| Crown ether -CH <sub>2</sub> - --- H(NO <sub>2</sub> Ar <sub>ring</sub> )  | 3.368                            |
| Crown ether -CH <sub>2</sub> - --- H(NO <sub>2</sub> Ar <sub>ring</sub> )  | 4.407                            |
| Crown ether -CH <sub>2</sub> - --- H(NO <sub>2</sub> Ar <sub>ring</sub> )  | 4.837                            |

Figure S118. Distances between atoms for 4•KOAc complex

## 6. References

1. M. Zakrzewski, D. Załubiniak and P. Piątek, *Dalton Trans.*, 2018, **47**, 323–330
2. The titration curves were fitted using Bindfit program <http://supramolecular.org> (a)P. Thordarson, *Chem. Soc. Rev.*, 2011, **40**, 1305–1323; (b) D. Brynn Hibbert and P. Thordarson, *Chemical Communications*, 2016, **52**, 12792–12805.
3. (a)F. Neese, *WIREs Comput Mol Sci*, 2012, **2**, 73–78; (b) F. Neese, *WIREs Comput Mol Sci*, , DOI:[10.1002/wcms.1327](https://doi.org/10.1002/wcms.1327)
4. M. D. Hanwell, D. E. Curtis, D. C. Lonie, T. Vandermeersch, E. Zurek and G. R. Hutchison, *J Cheminform*, 2012, **4**, 17.
5. (a) A. D. Becke, *The Journal of Chemical Physics*, 1993, **98**, 5648–5652; (b)C. Lee, W. Yang and R. G. Parr, *Phys. Rev. B*, 1988, **37**, 785–789; (c) S. H. Vosko, L. Wilk and M. Nusair, *Can. J. Phys.*, 1980, **58**, 1200–1211; (d)P. J. Stephens, F. J. Devlin, C. F. Chabalowski and M. J. Frisch, *J. Phys. Chem.*, 1994, **98**, 11623–11627
6. F. Weigend and R. Ahlrichs, *Phys. Chem. Chem. Phys.*, 2005, **7**, 3297
